# Supplementary material for: Fibration symmetries uncover the building blocks of biological networks
Source: PubMed Central journal article supplement — Proc Natl Acad Sci U S A. 2020 Mar 31;117(15):8306–14. doi: 10.1073/pnas.1914628117 (PMC7165483; doi:10.1073/pnas.1914628117), 2020-03-31

Id = 1

$|n = 0, \ell = 1\rangle$

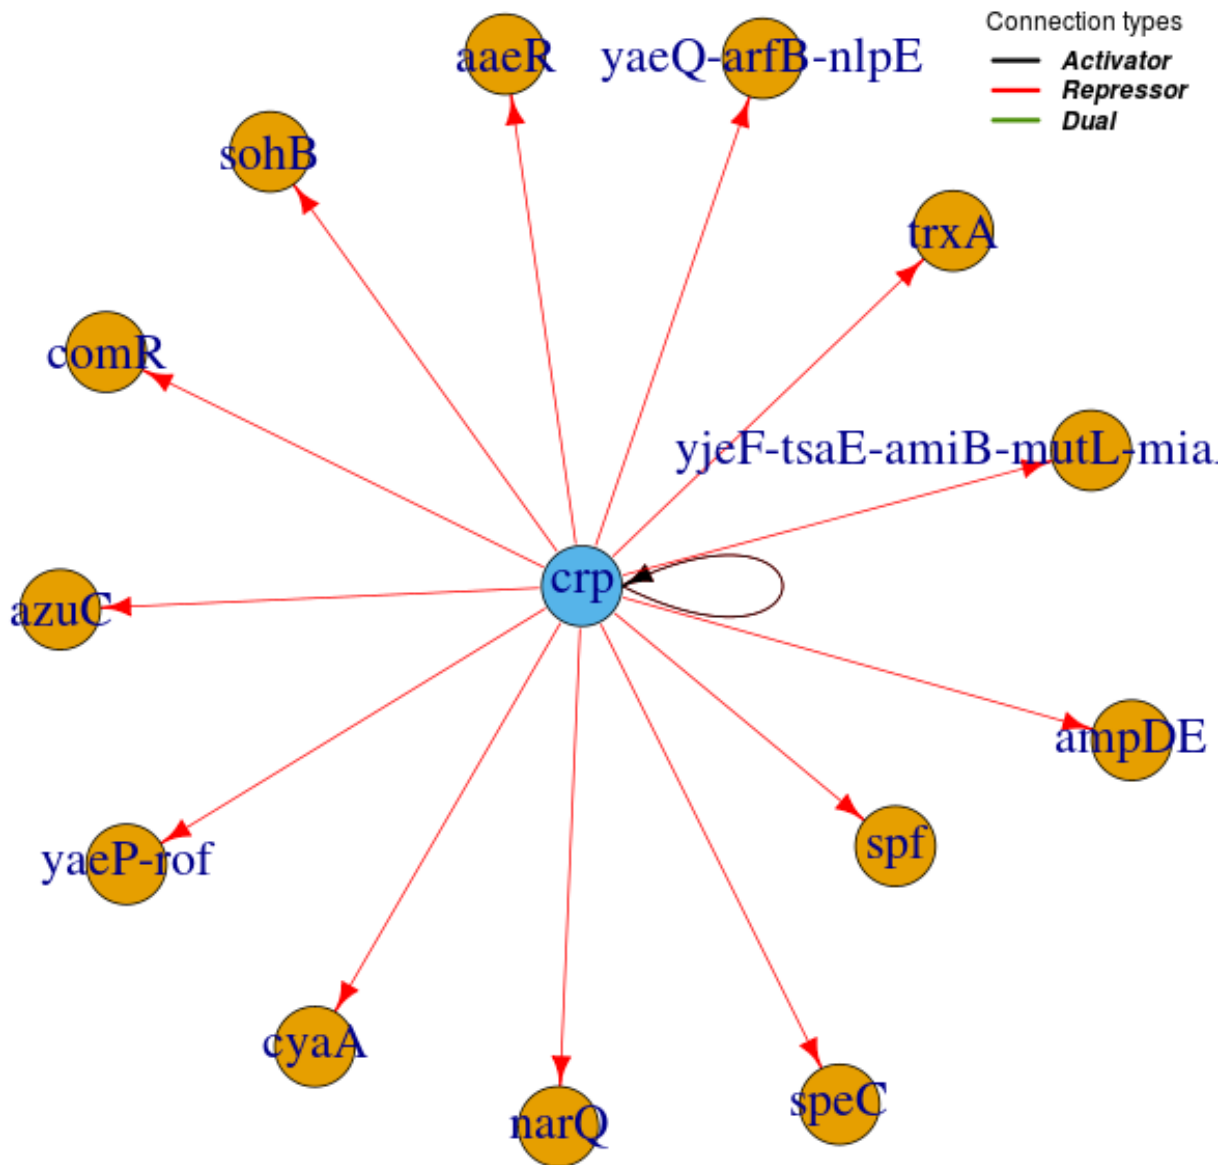

Id = 2

$|n = 0, \ell = 1\rangle$

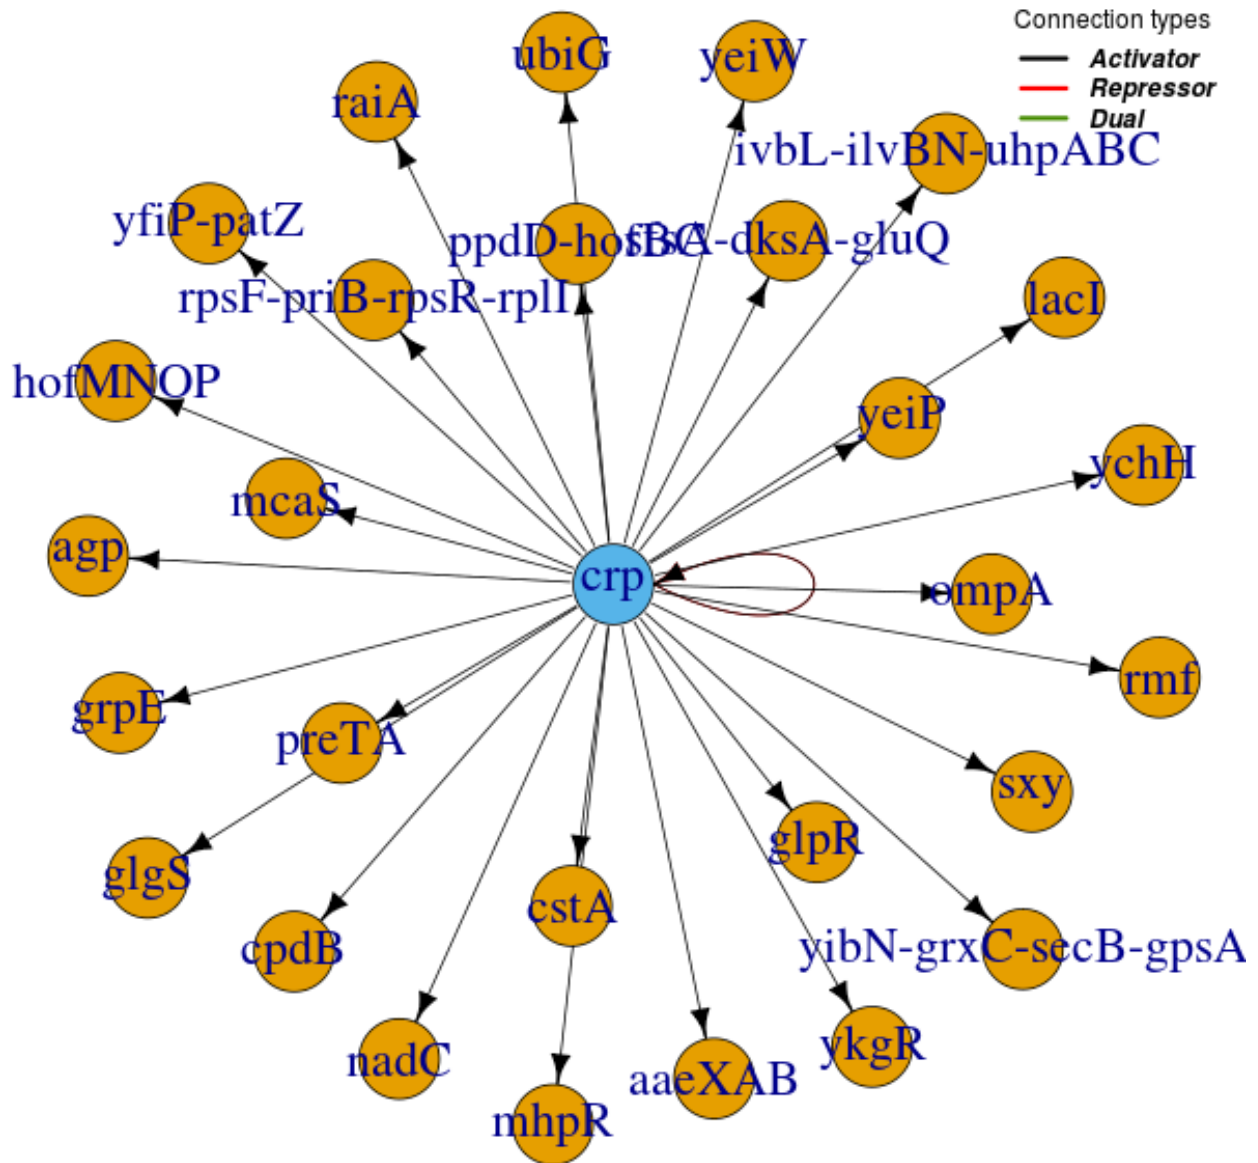

Id = 3

$|n = 1, \ell = 0\rangle$

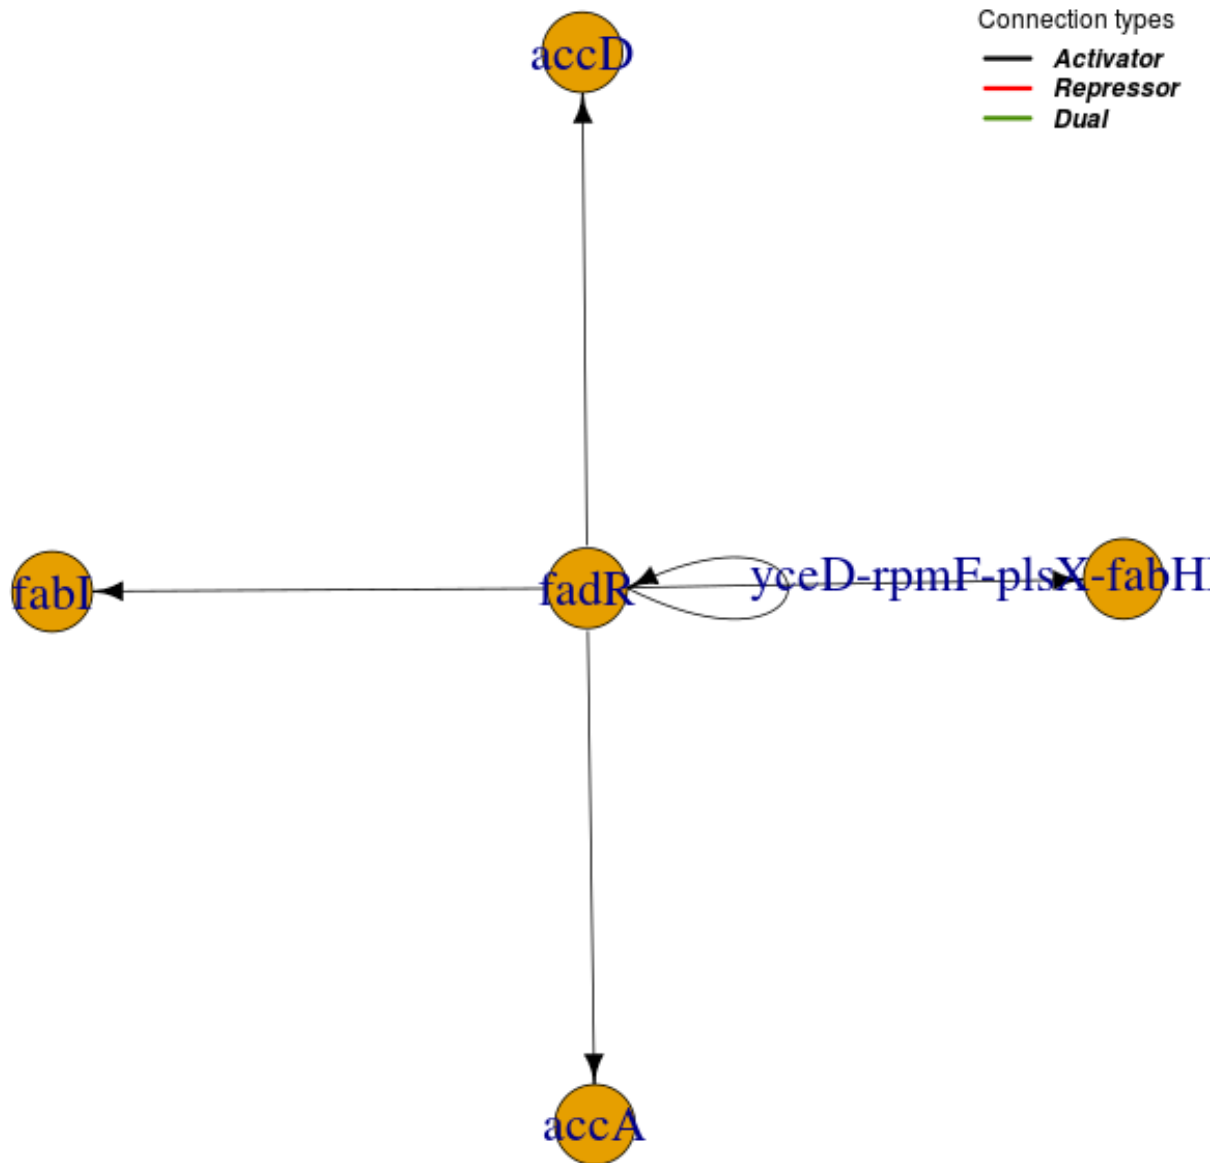

Id = 4

$|n = 1, \ell = 1\rangle$

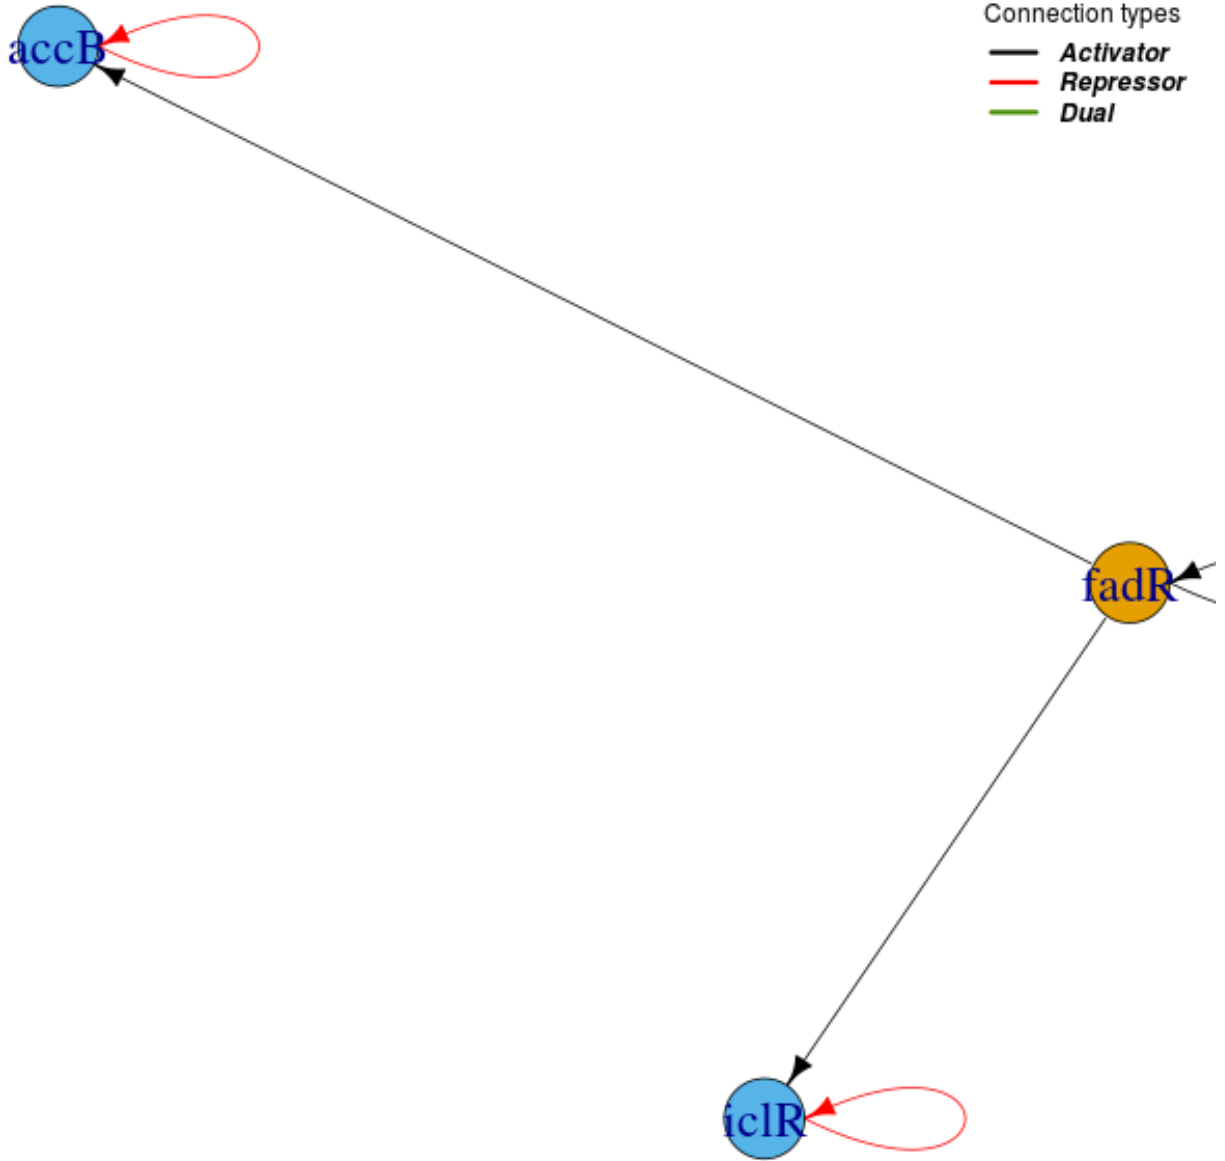

Id = 5

$|n = 0, \ell = 2\rangle$

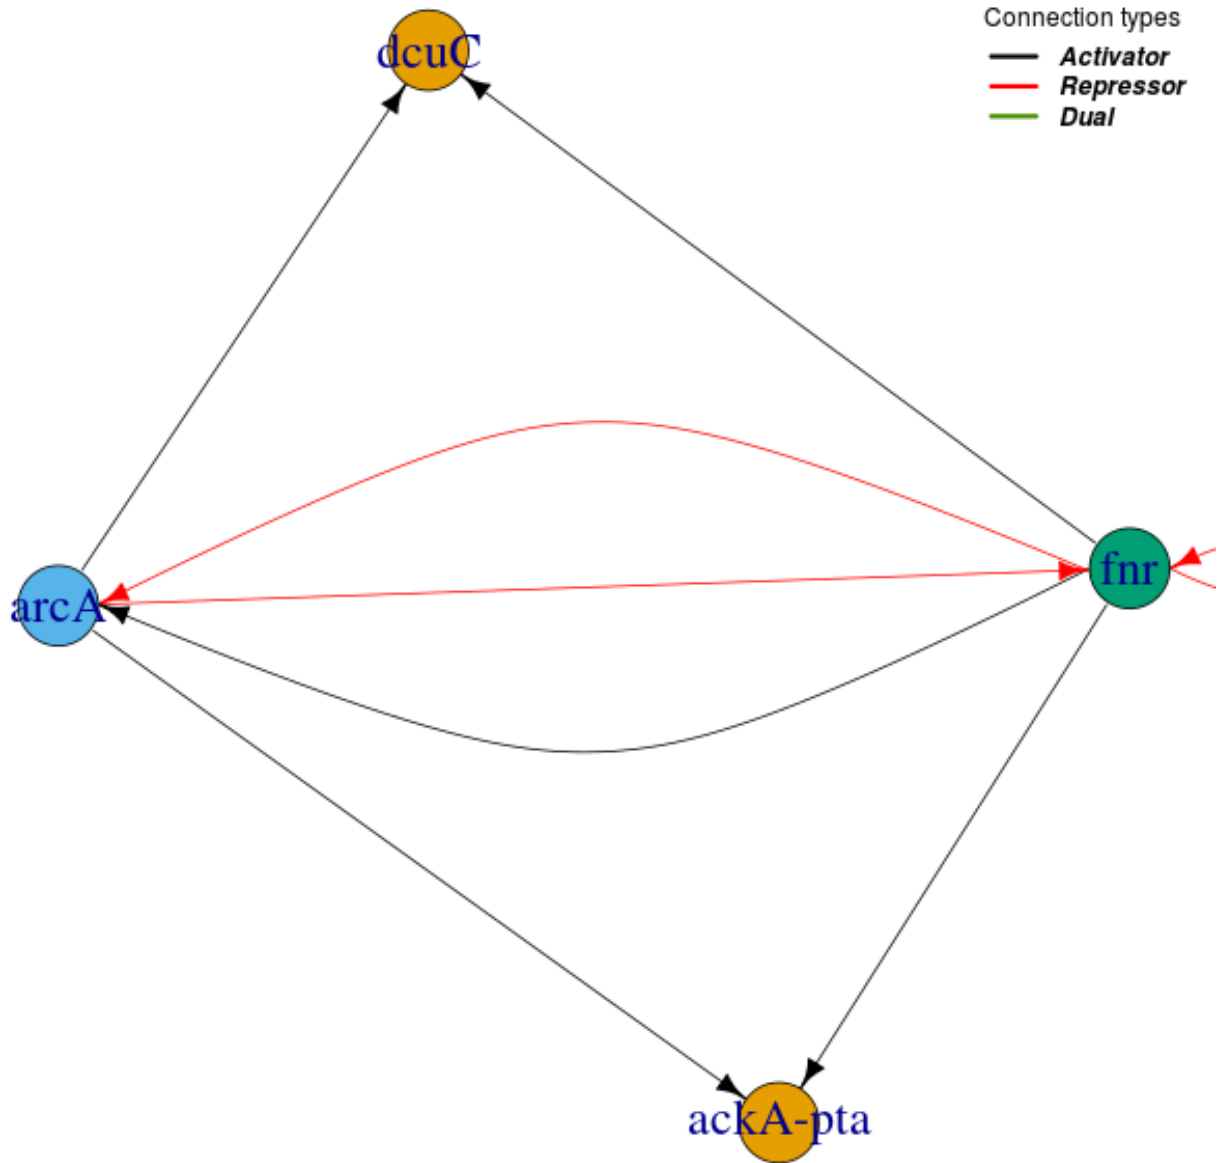

Id = 6

$|n = 0, \ell = 3\rangle$

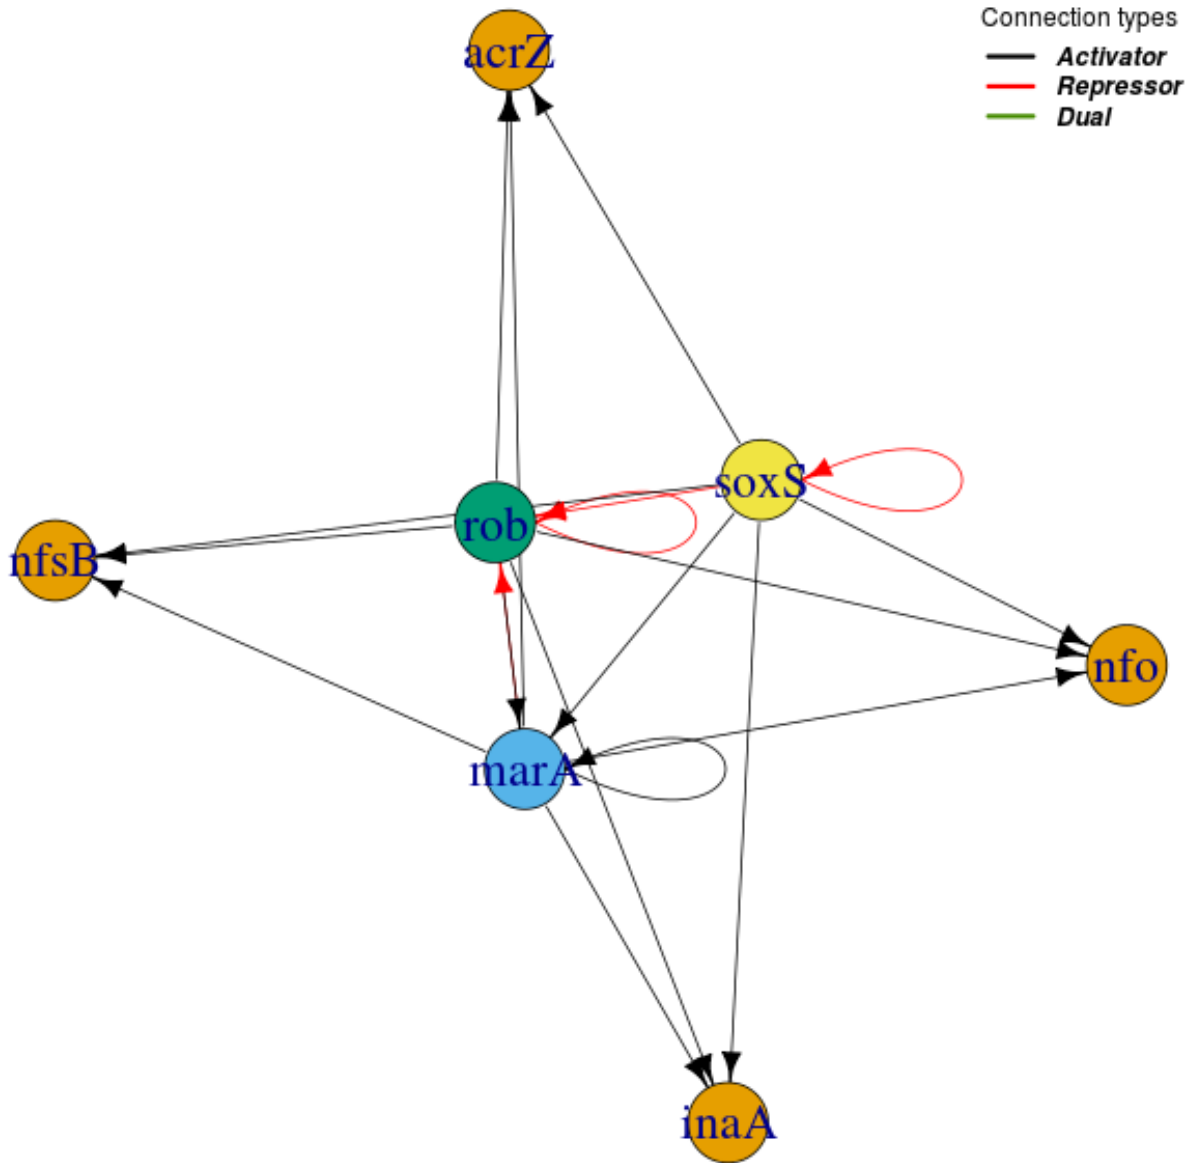

Id = 7

$|n = 0, l = 1\rangle \oplus |n = 1, l = 1\rangle$

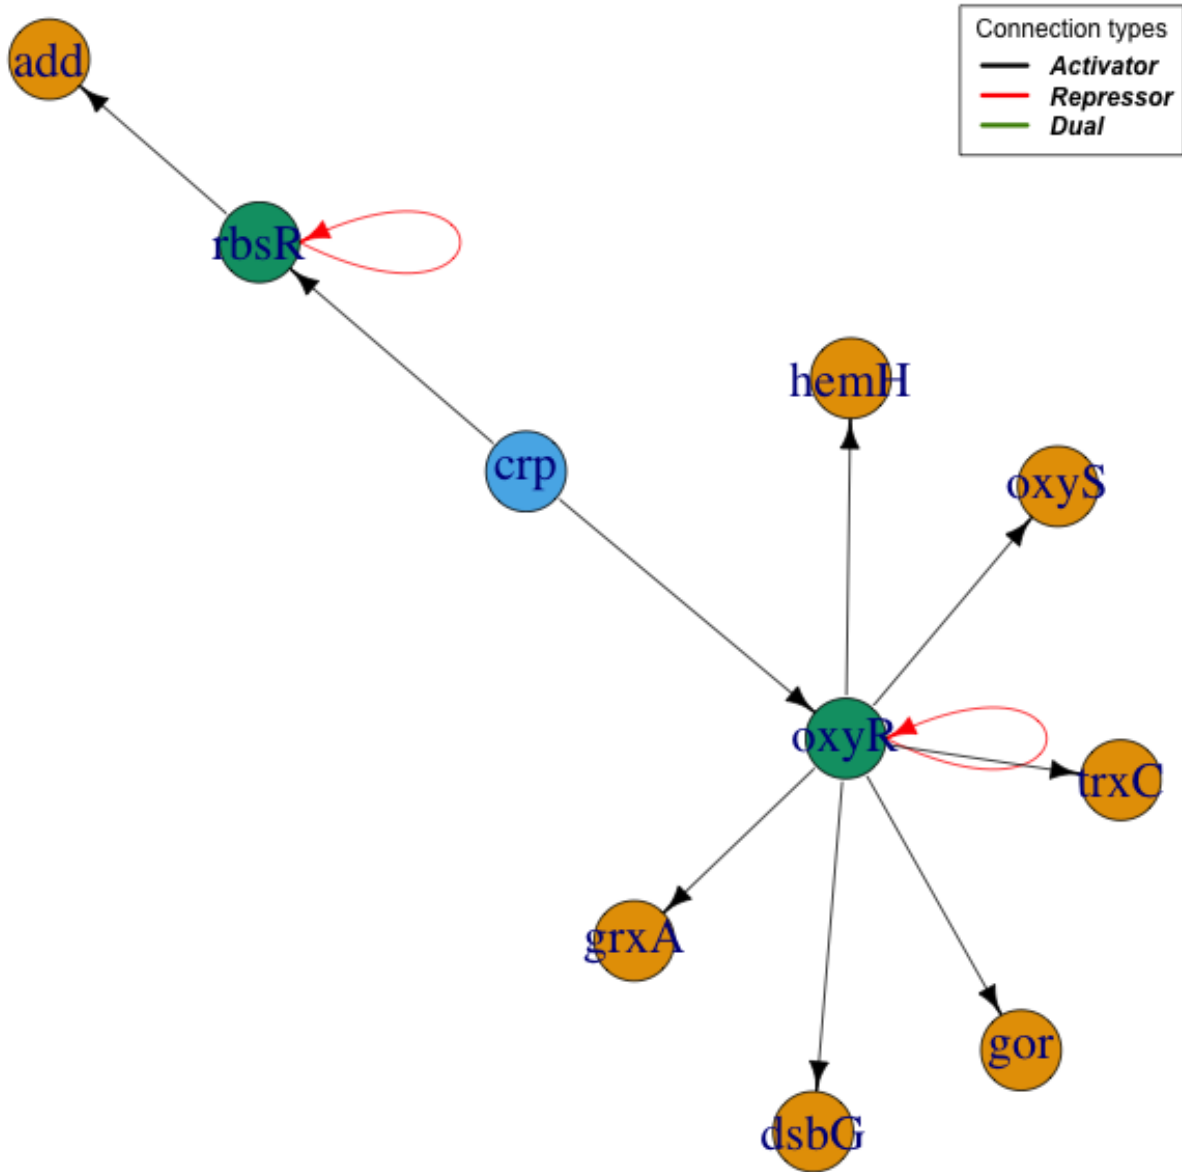

Id = 8

$|\varphi_d = 1.4655\dots, \ell = 1\rangle$

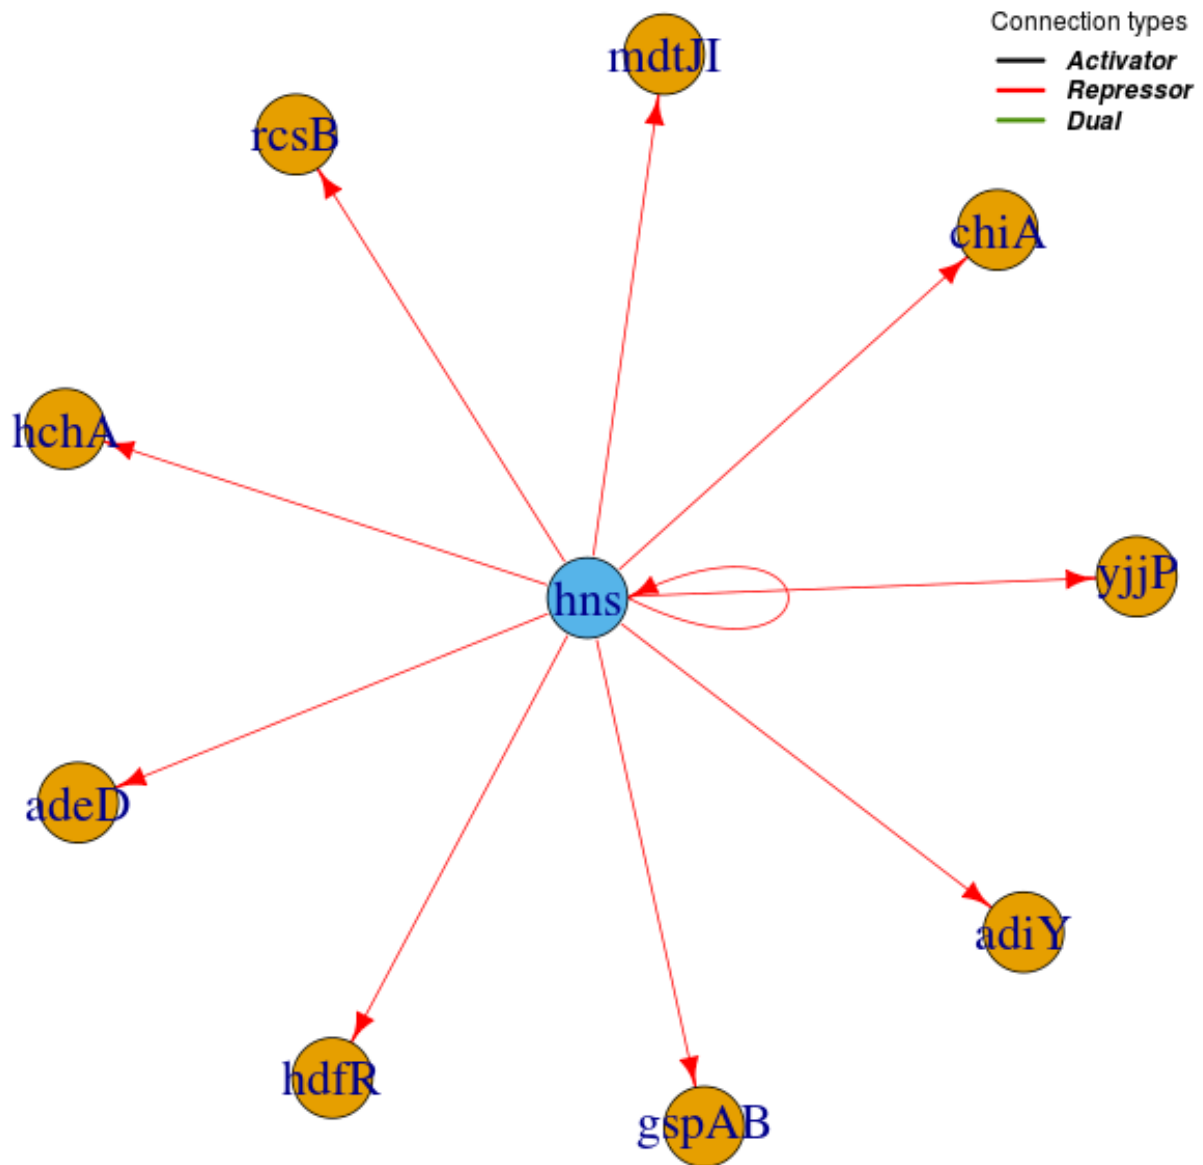



Id = 9

$|n = 1, \ell = 0\rangle$

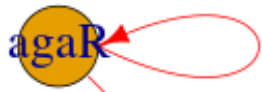

Connection types

- **Activator**
- **Repressor**
- **Dual**

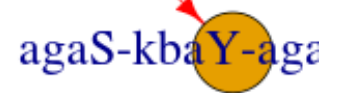

Id = 10

$|n = 0, \ell = 1\rangle$

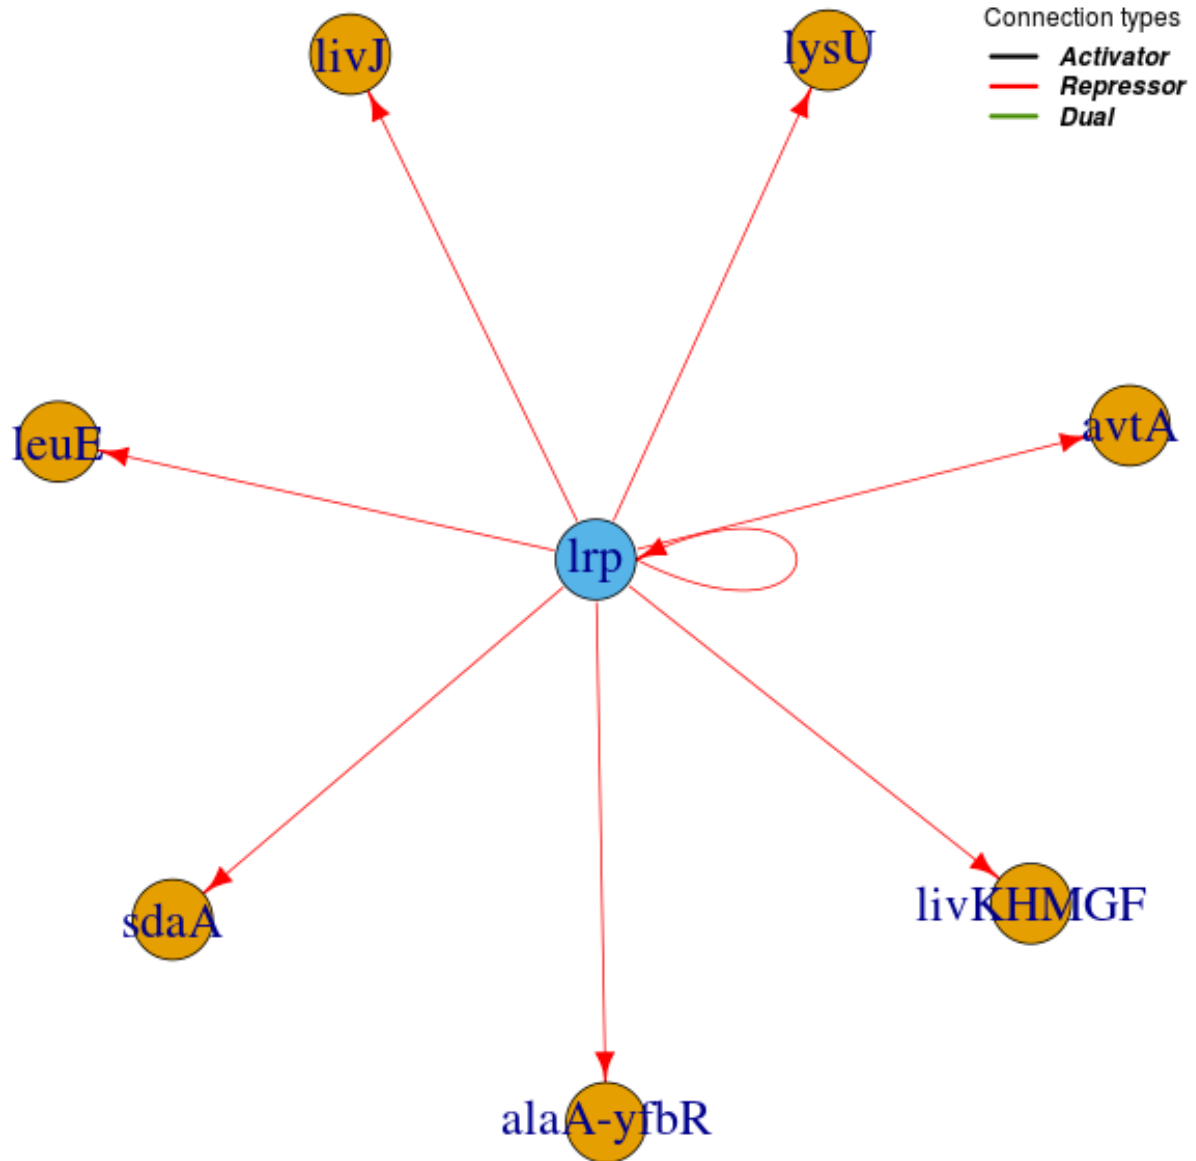

Id = 11

$|n = 0, \ell = 1\rangle$

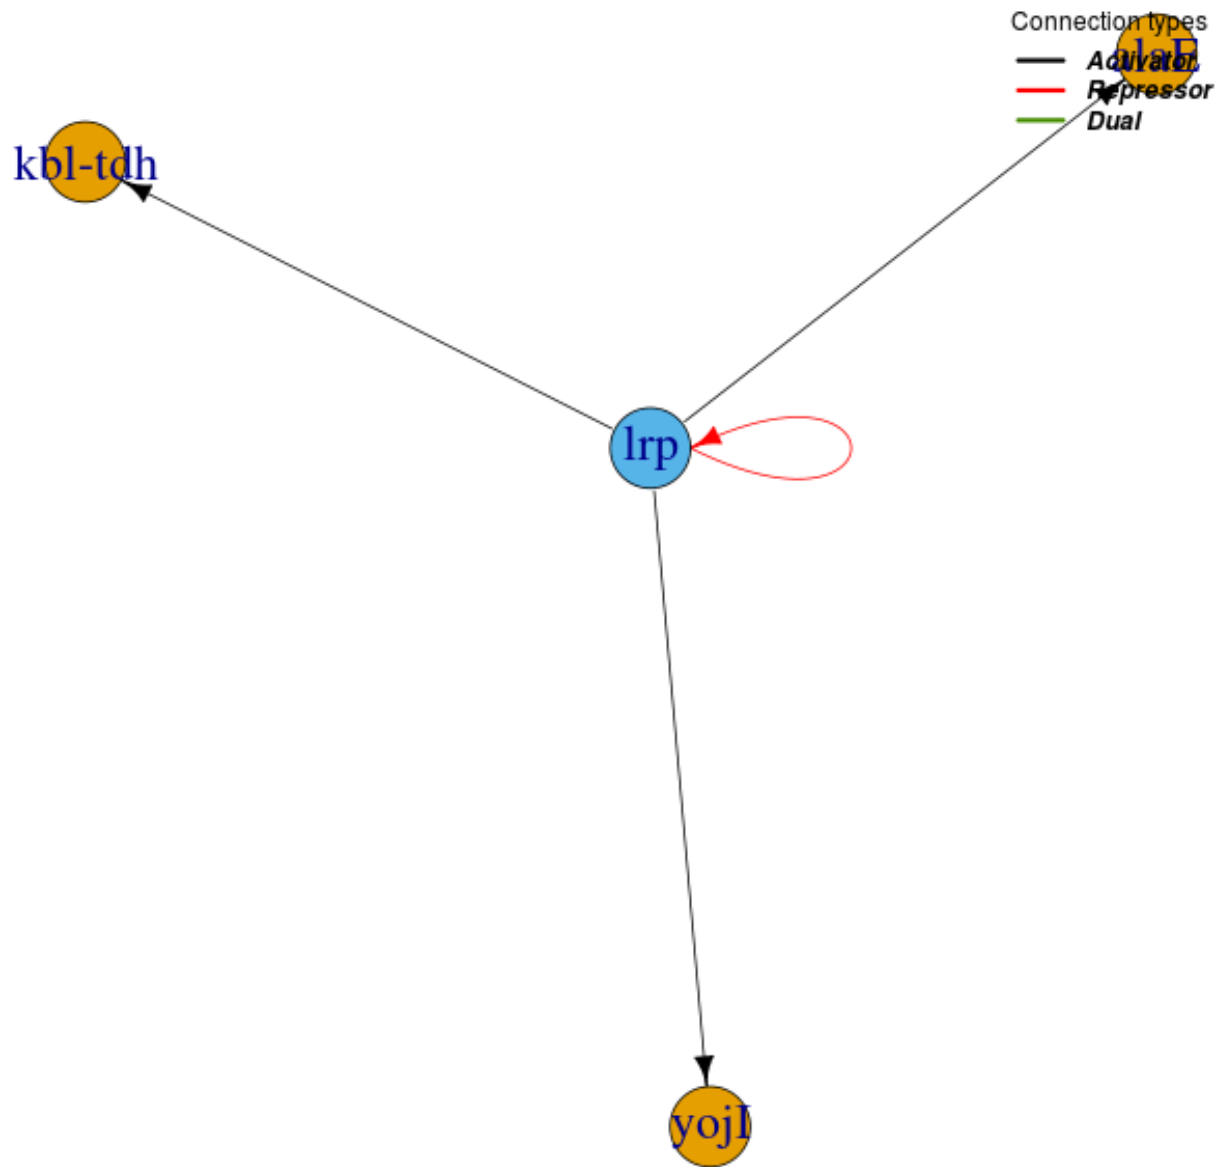





Id = 14

$|n = 0, \ell = 1\rangle$

gcl-hyi-glxR-ybbW-allB-ybbY-glxK

Connection types

— *Activator*

— *Repressor*

— *Dual*

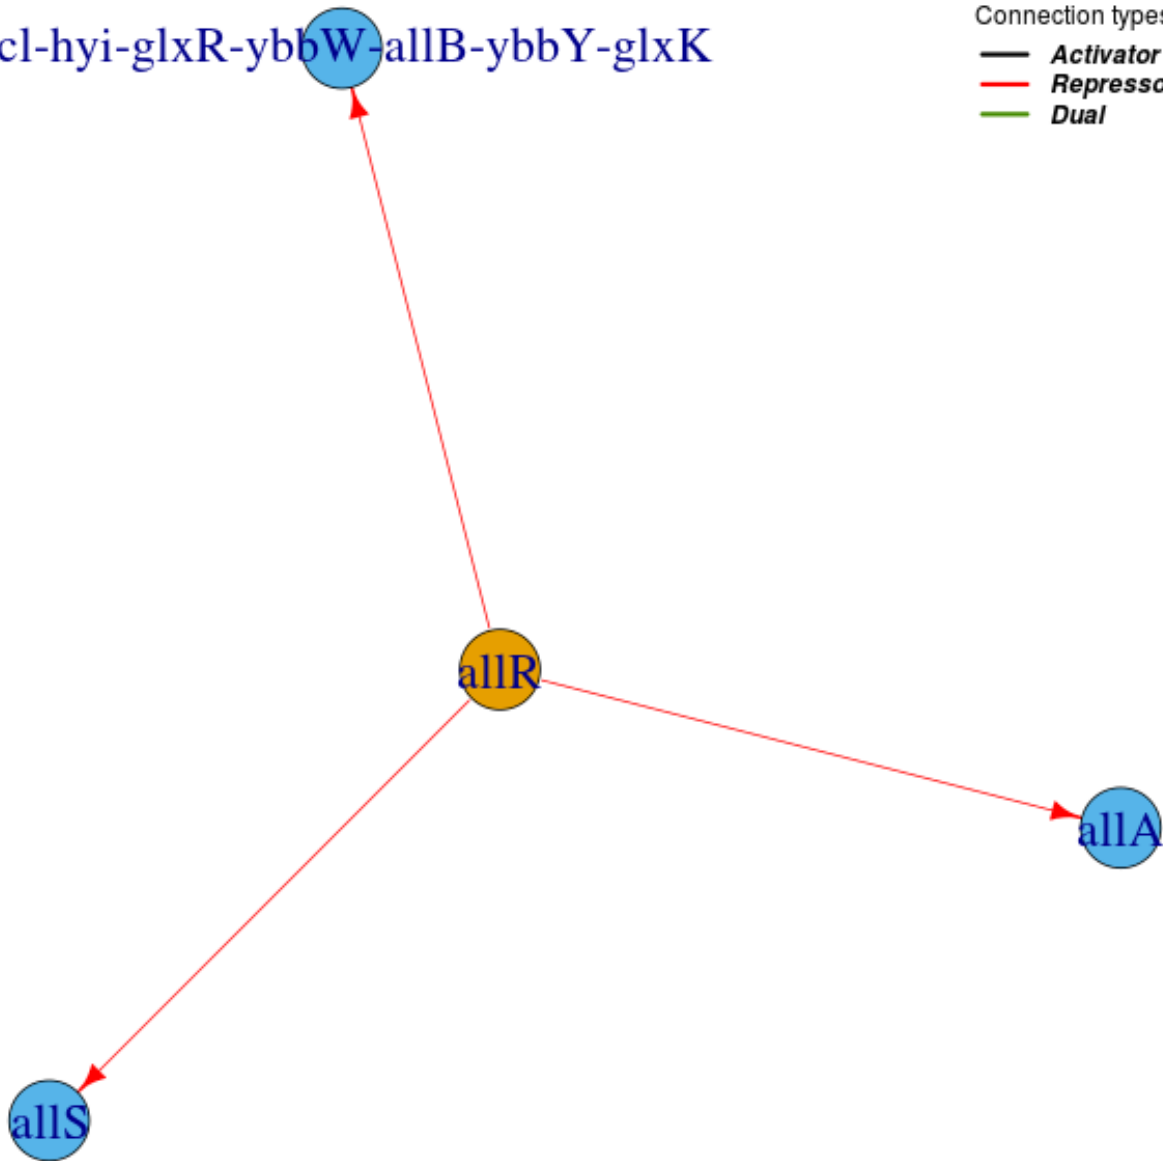

Id = 15

$|n = 1, \ell = 0\rangle$

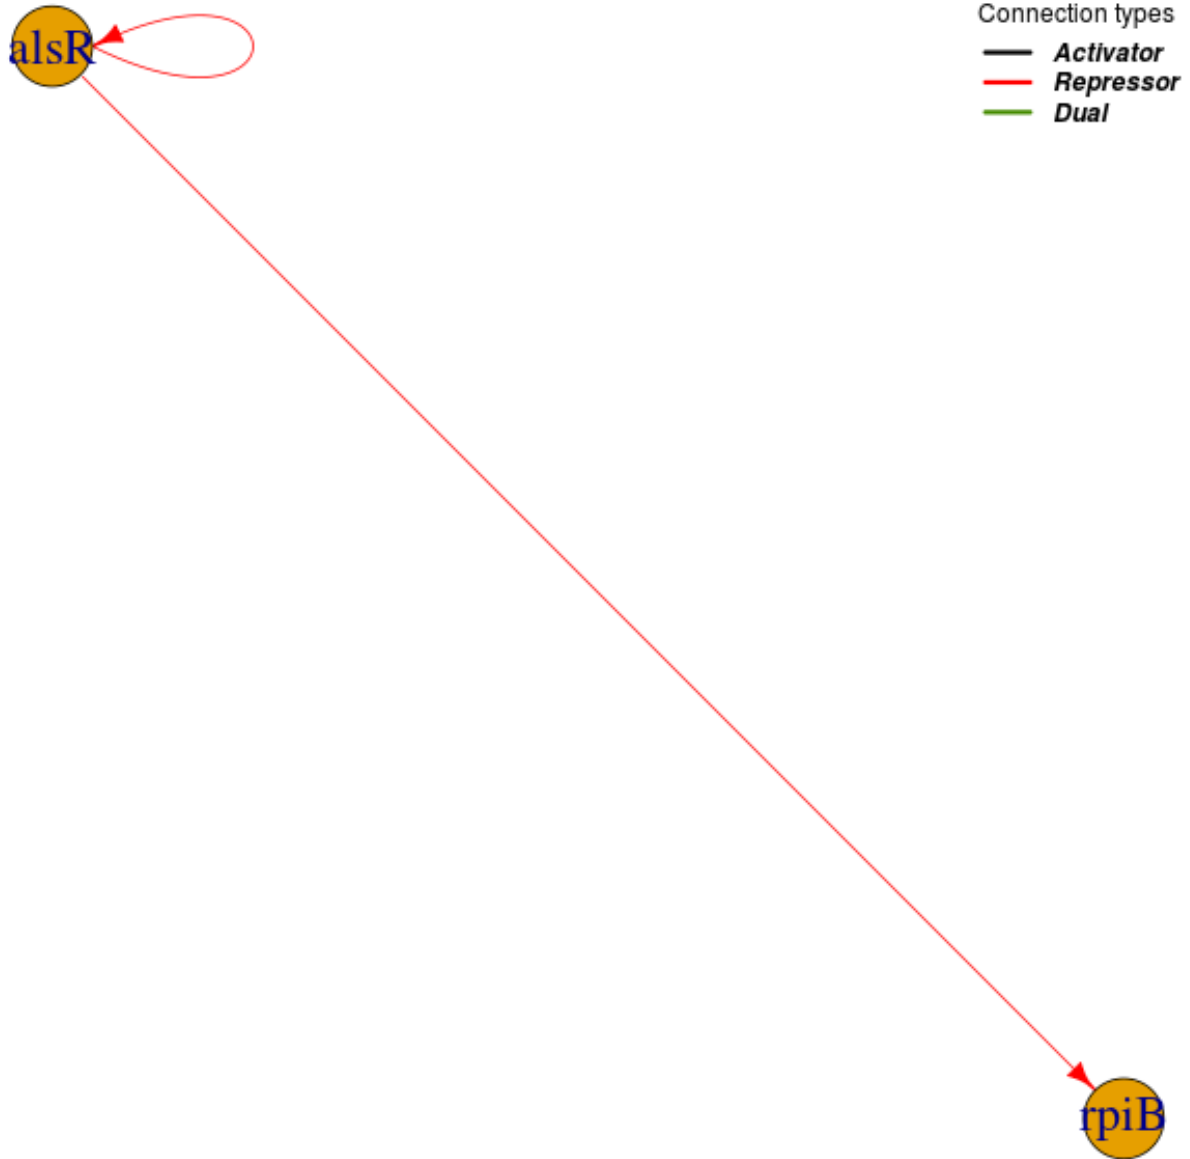

Id = 16

$|n = 0, \ell = 1\rangle$

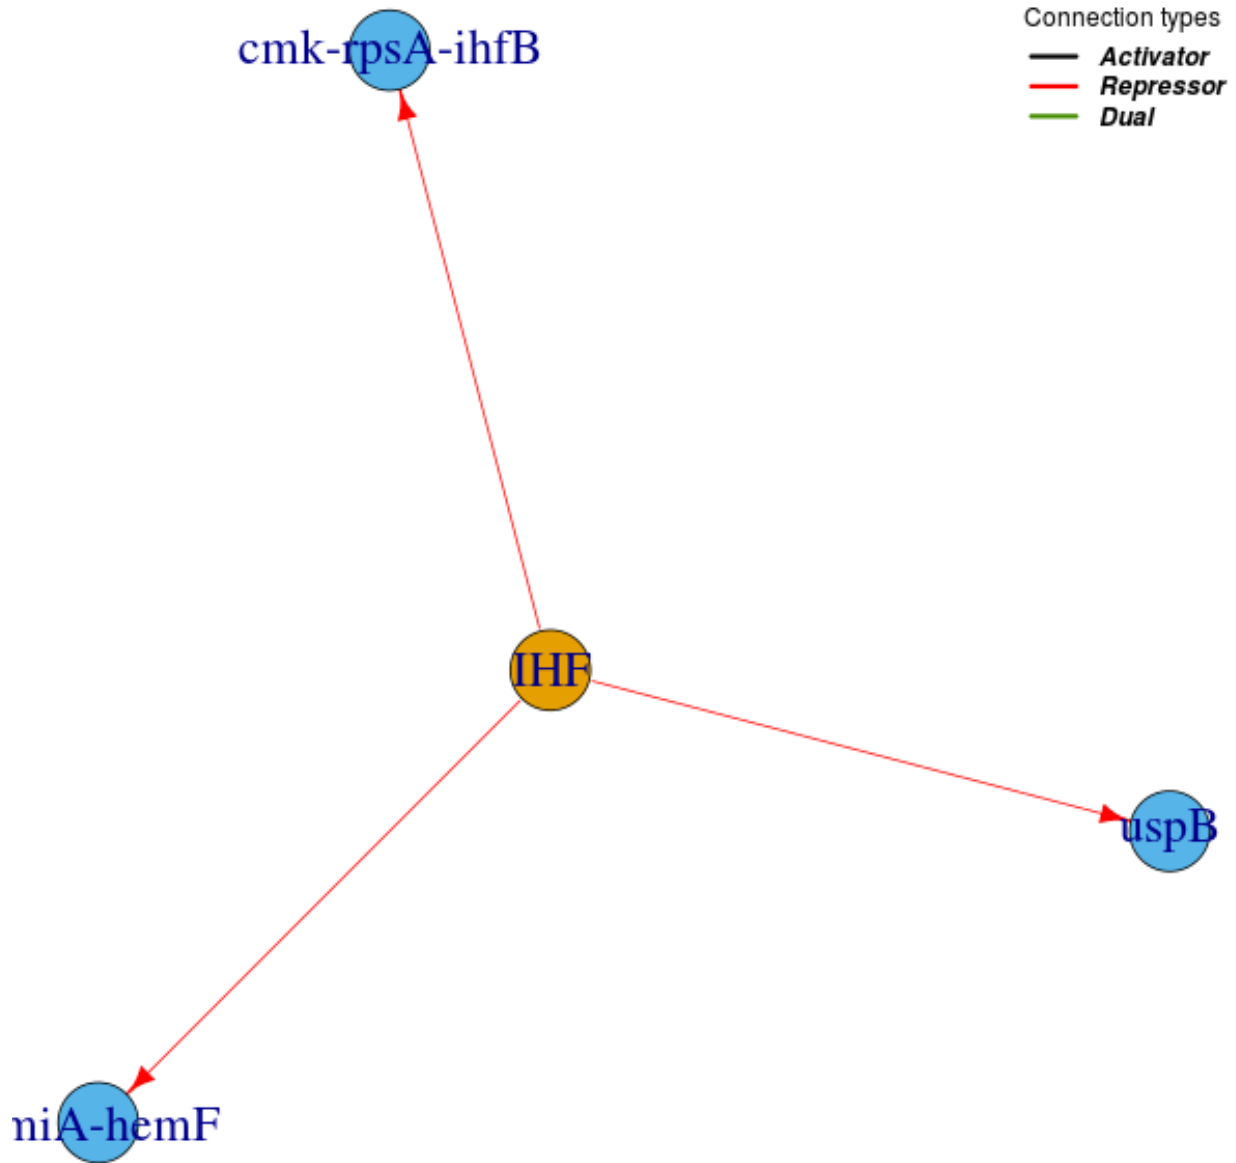



Id = 17

$|n = 1, \ell = 0\rangle$

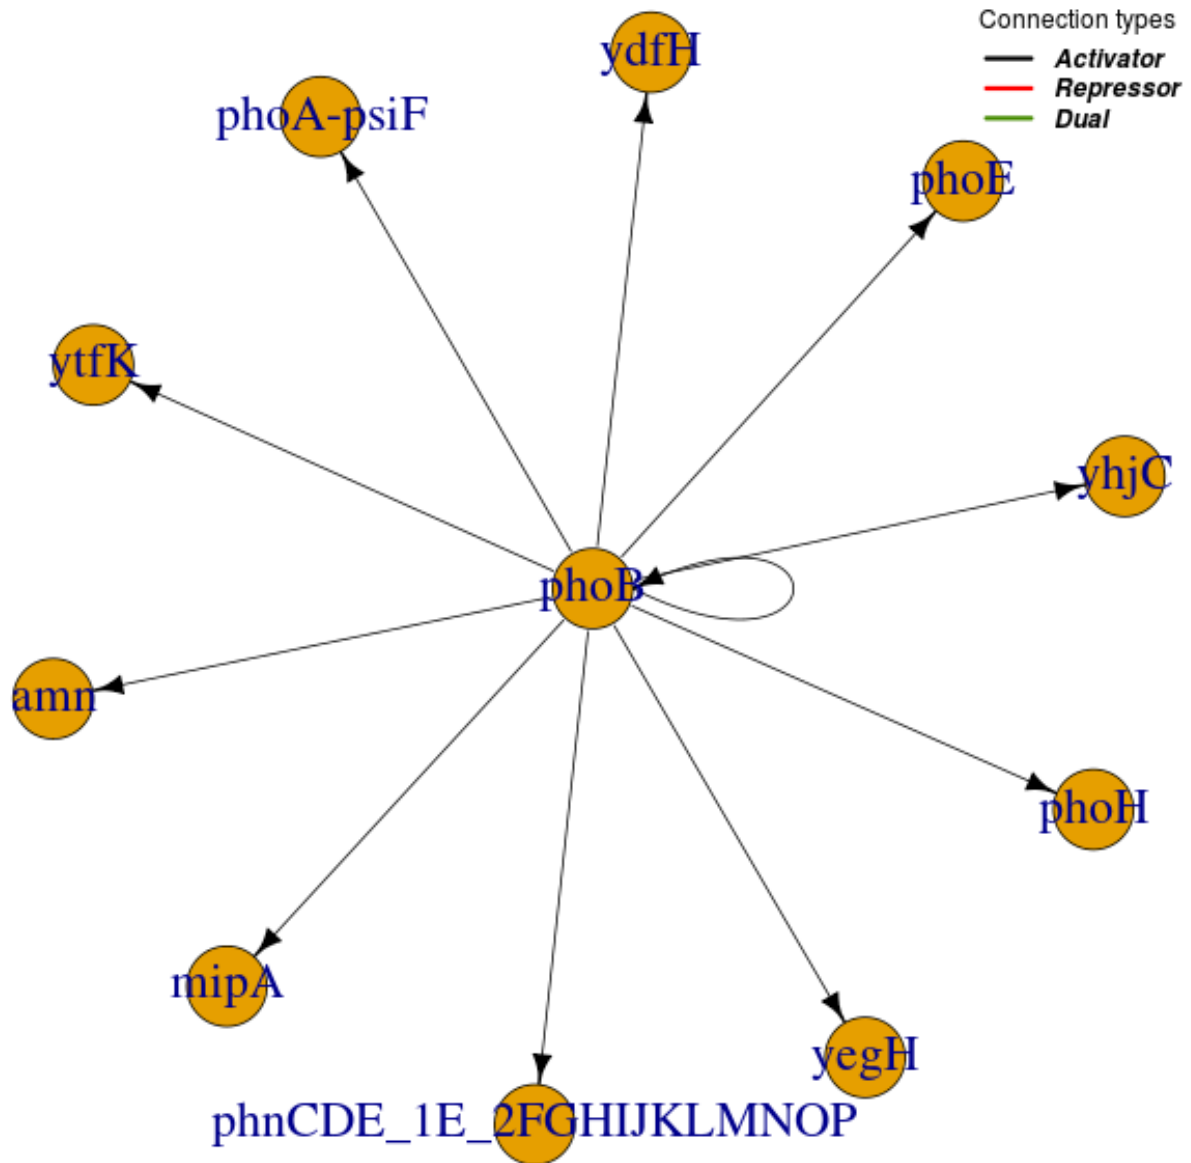

Id = 18

$|n = 0, \ell = 1\rangle$

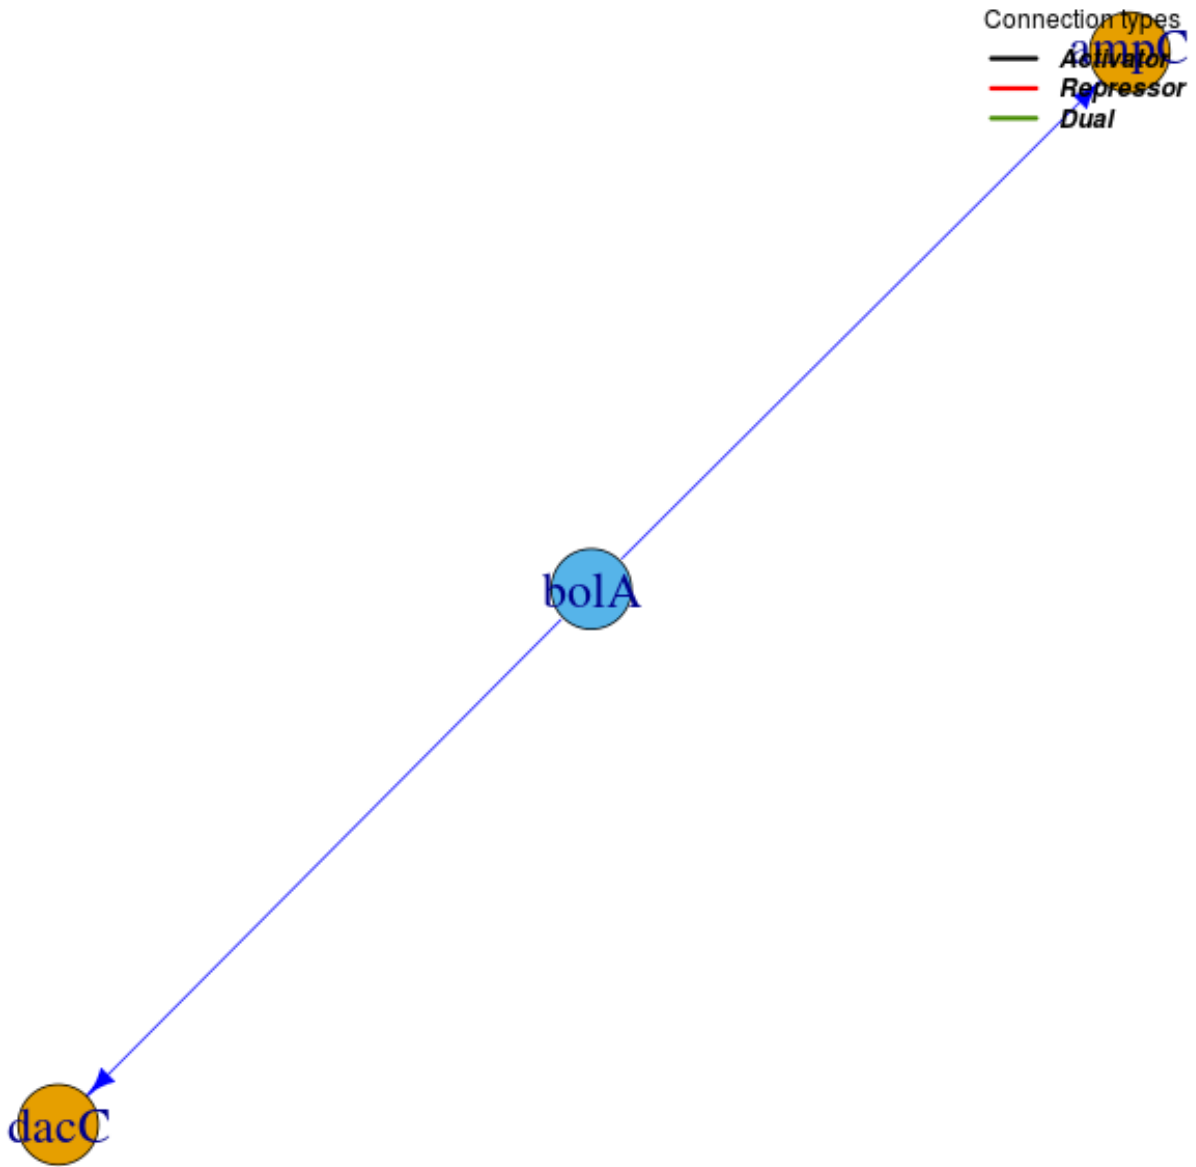

Id = 19

$|n = 0, \ell = 2\rangle$

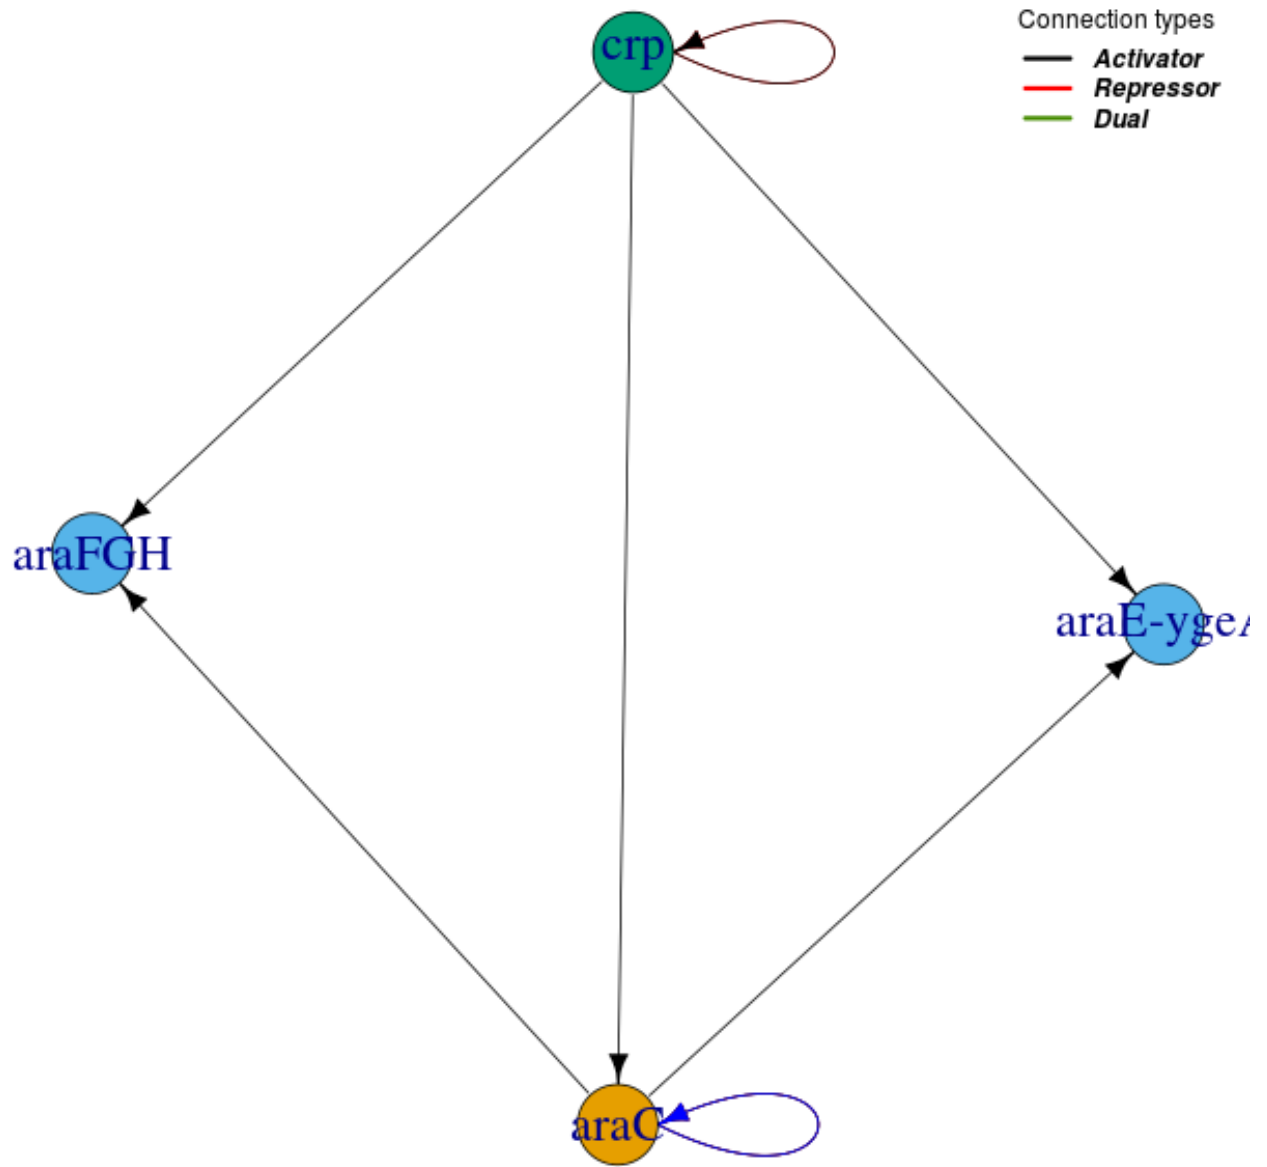

Id = 20

$|n = 0, \ell = 1\rangle$

ydeA

Connection types

— *Activator*

— *Repressor*

— *Dual*

arcA

arcZ

Id = 21

$|n = 1, \ell = 0\rangle$

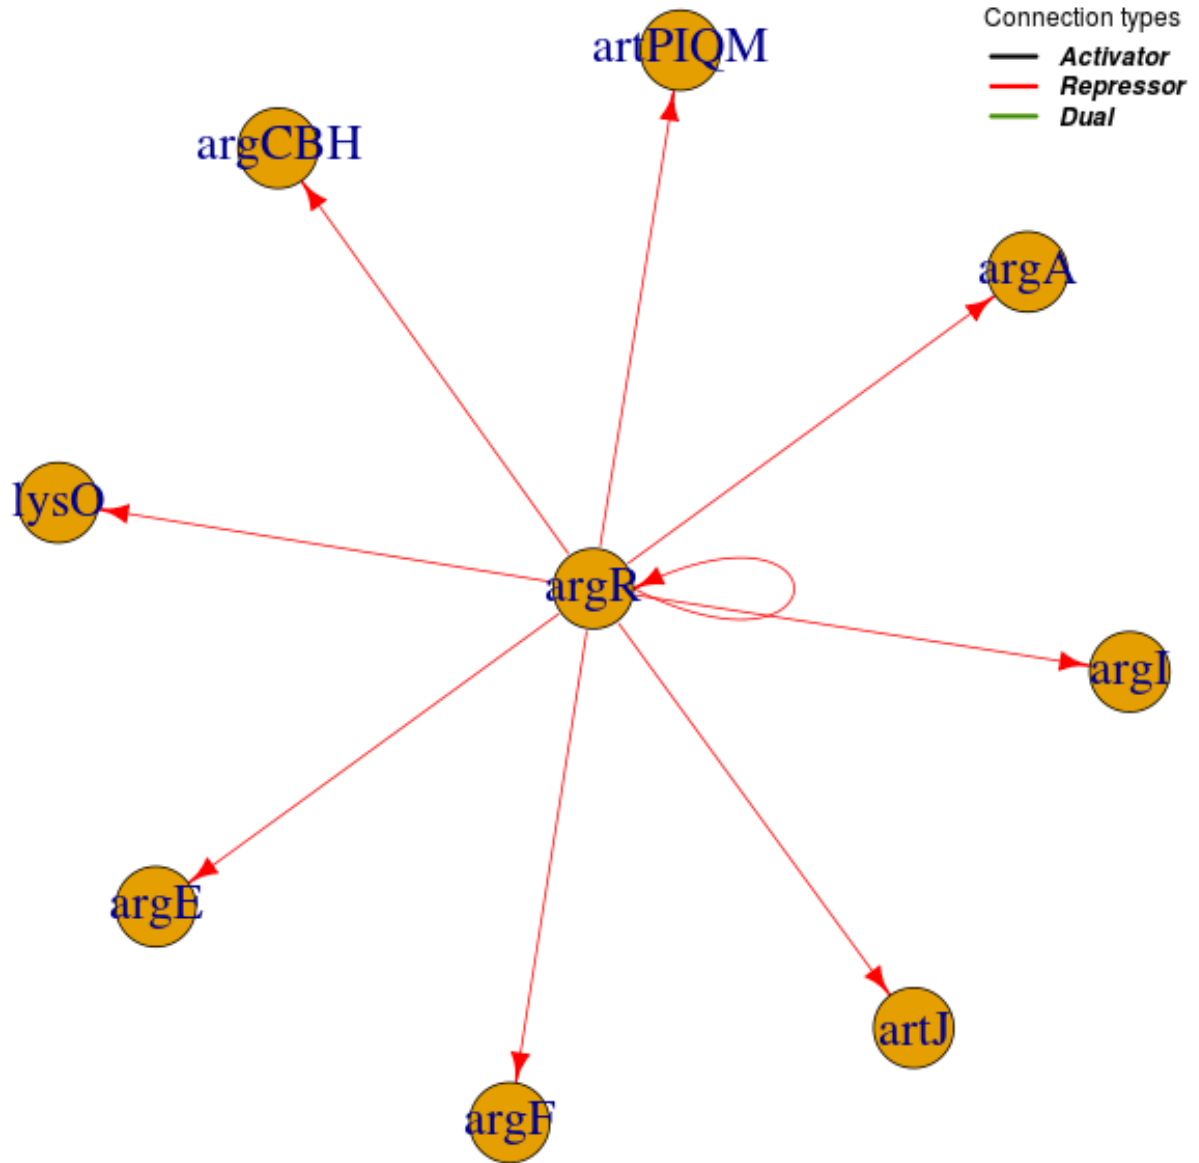

Id = 22

$|n = 0, \ell = 2\rangle$

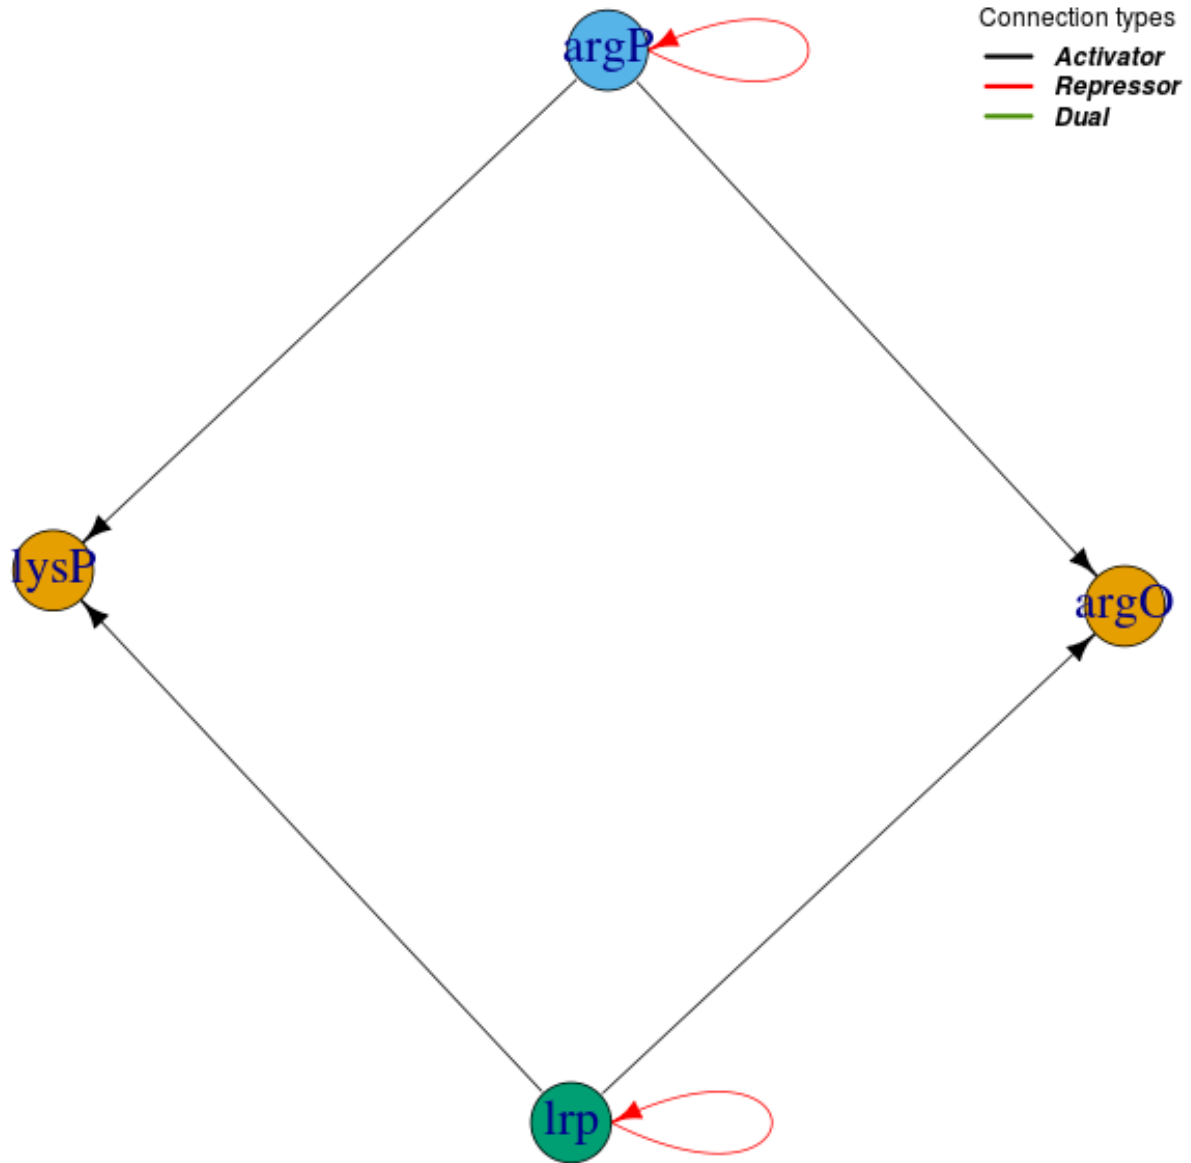

Id = 23

$|n = 0, \ell = 1\rangle$

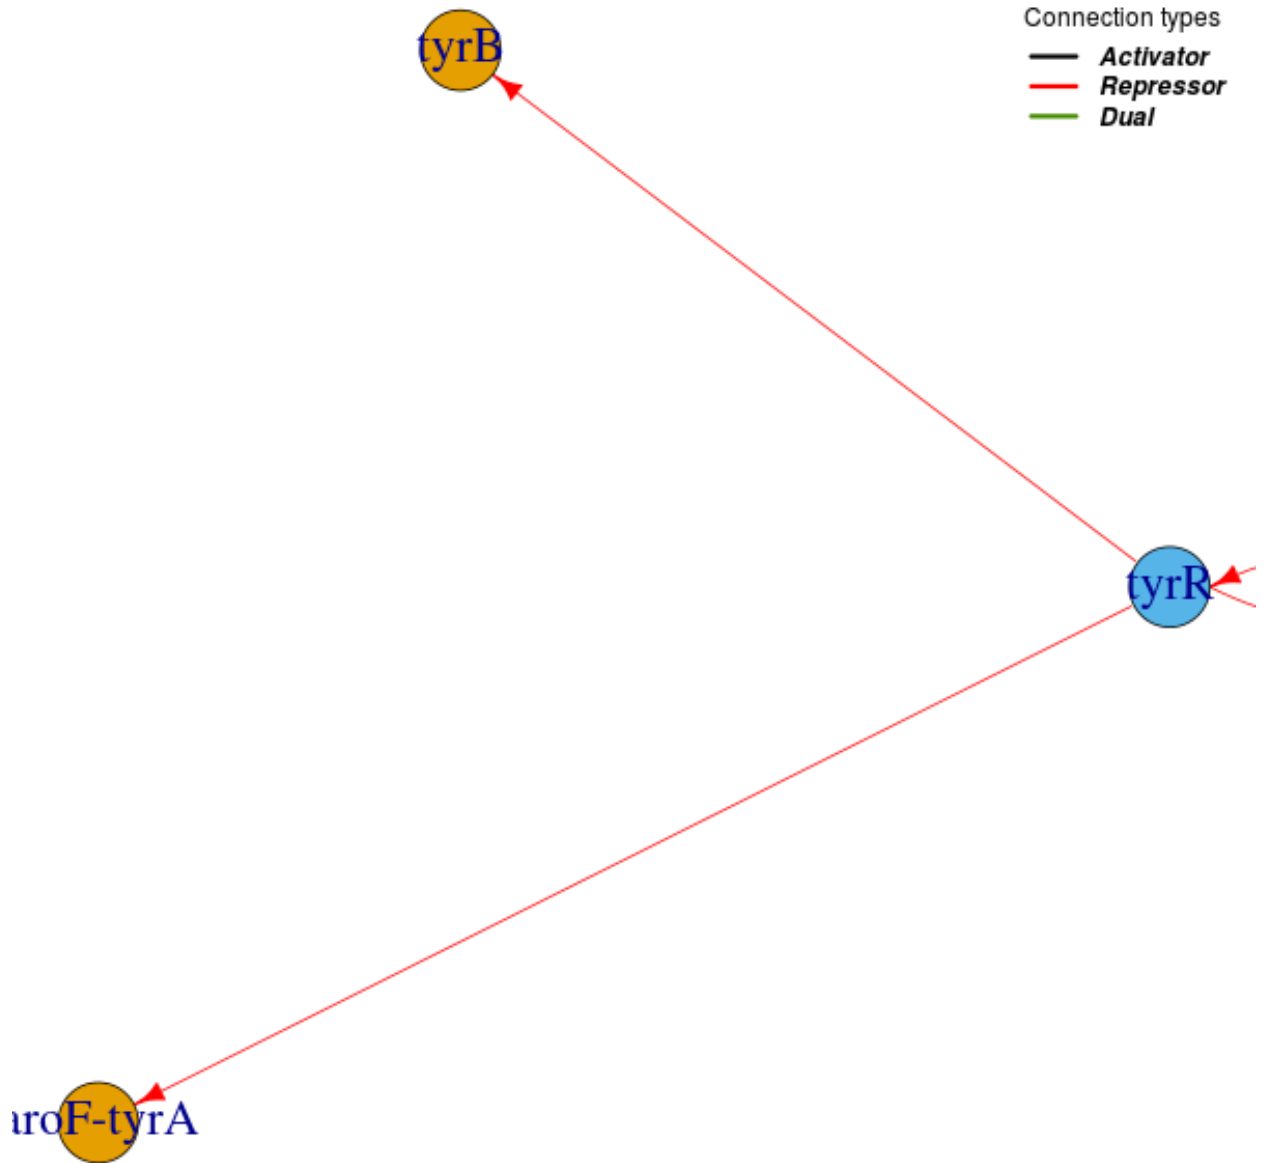

Id = 24  
 $|n = 1, \ell = 0\rangle$

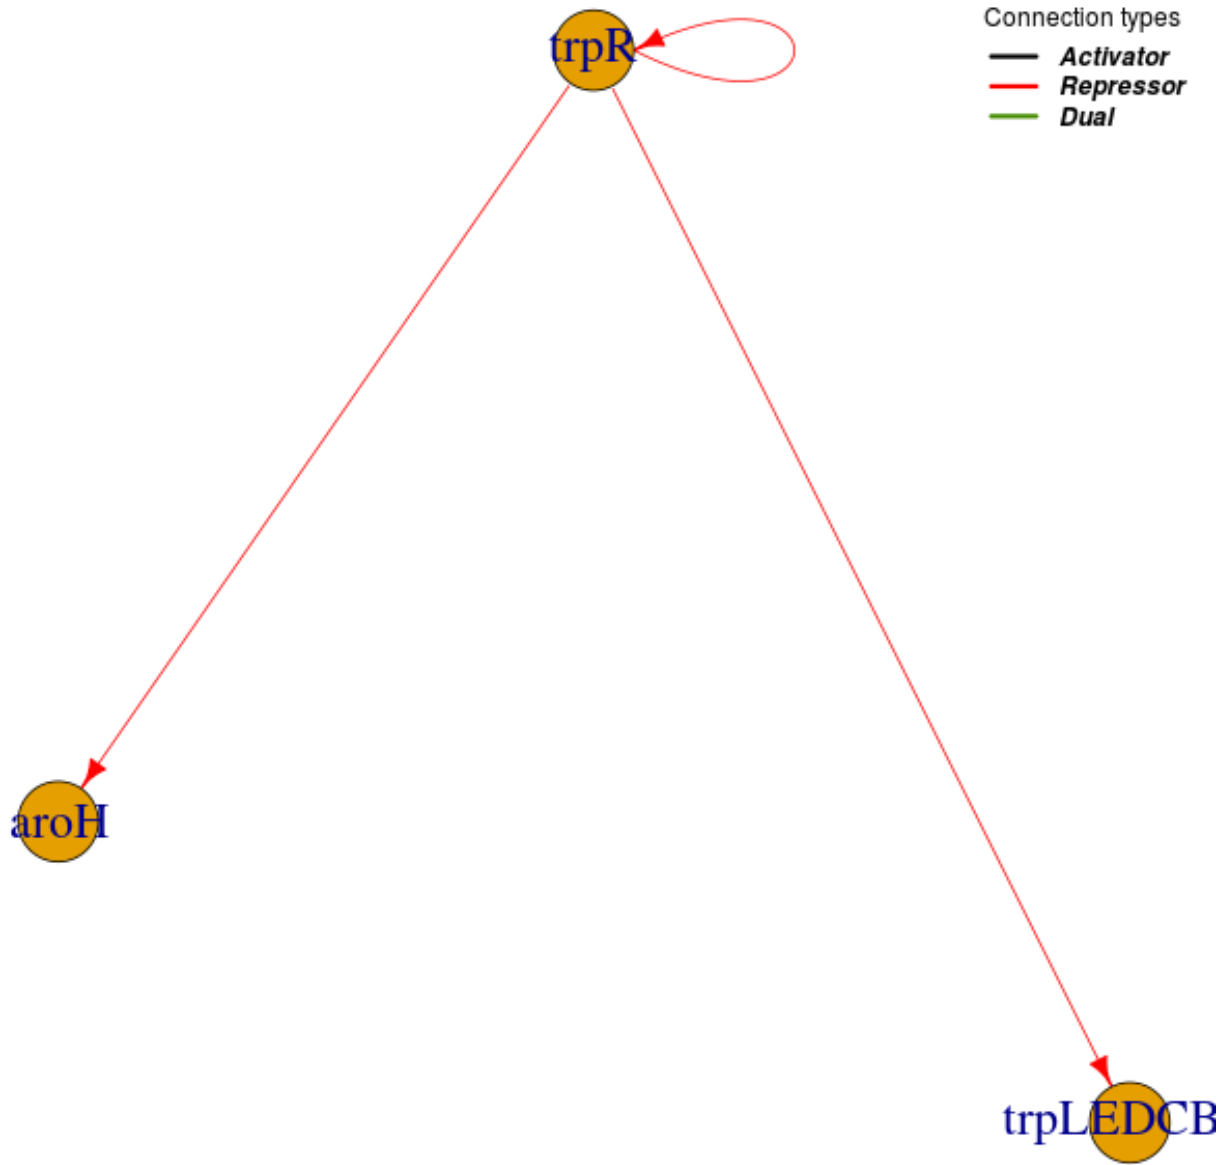



Id = 25

$|n = 0, \ell = 1\rangle$

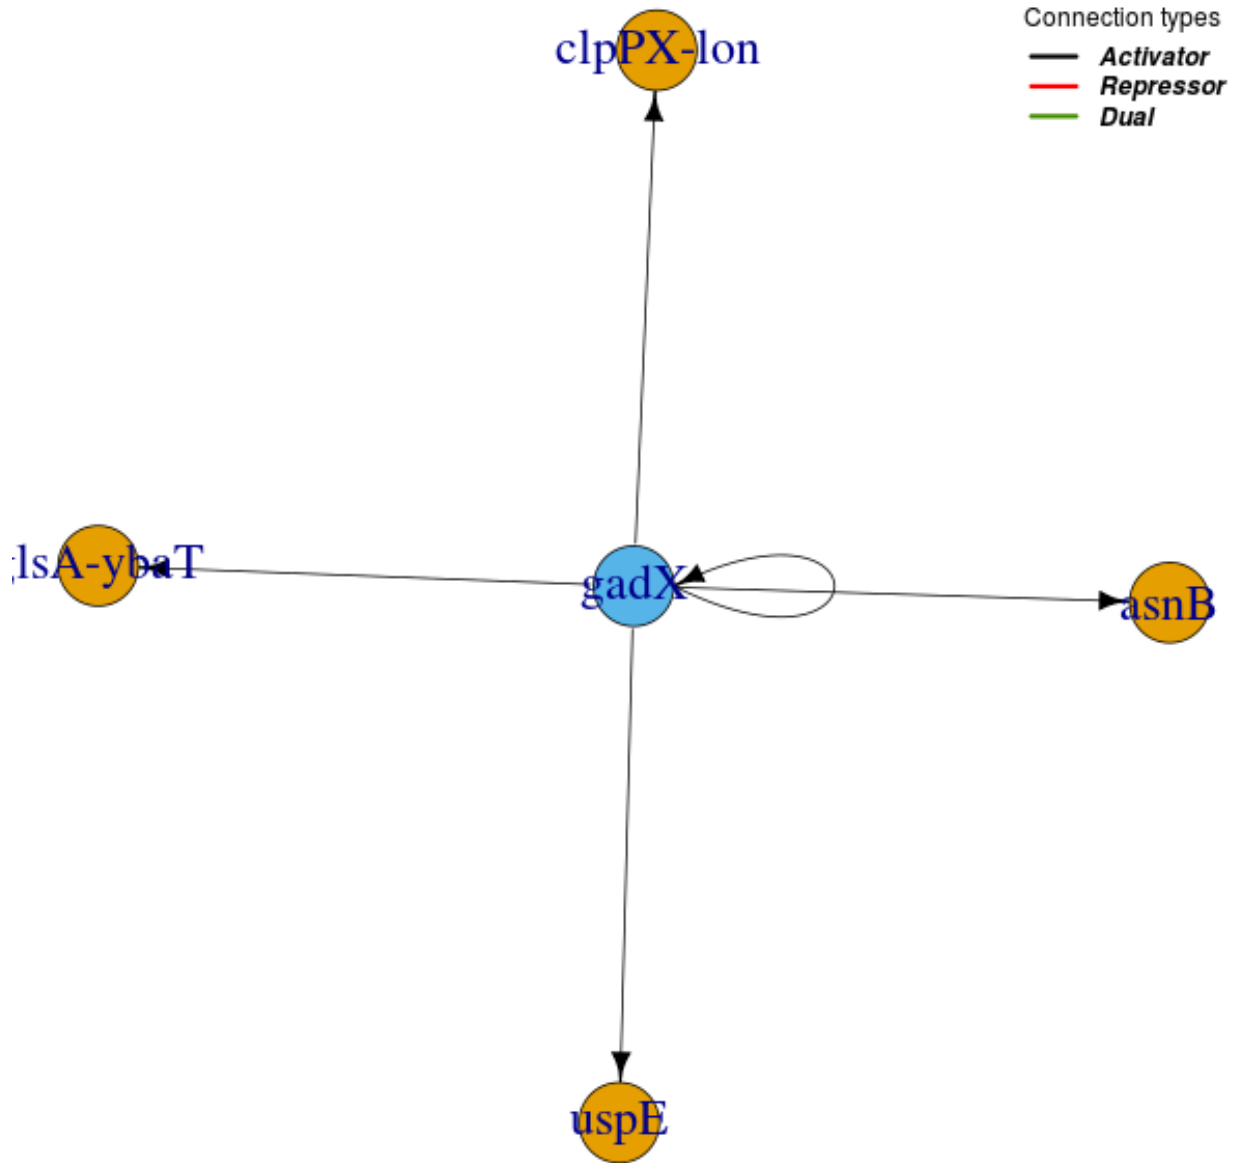

Id = 26

$|n = 0, \ell = 3\rangle$

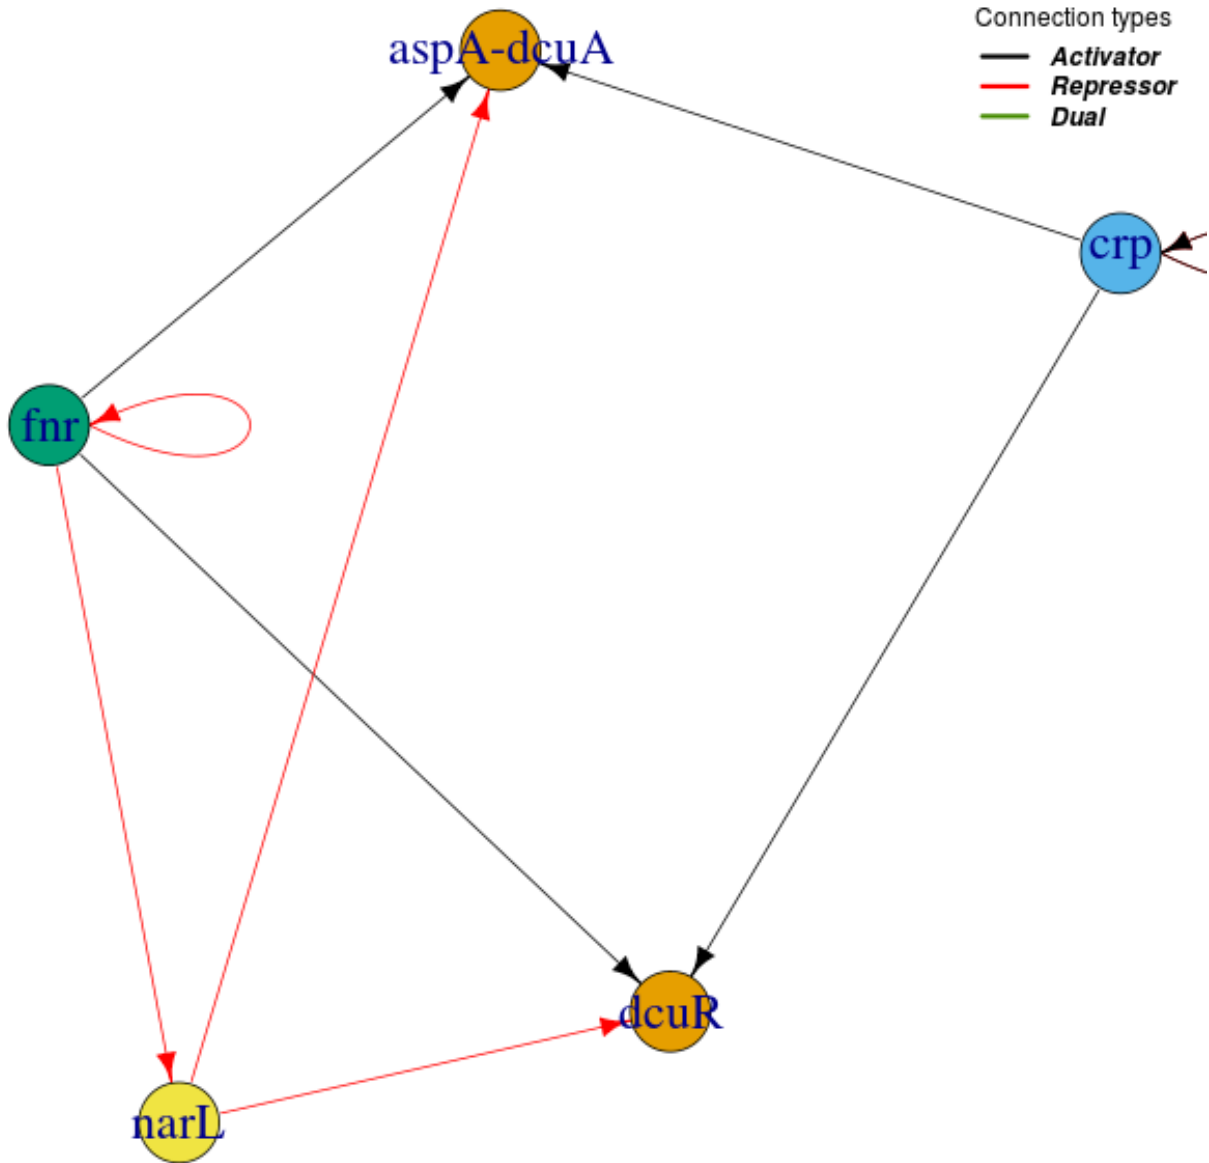

Id = 27

$|n = 1, \ell = 0\rangle$

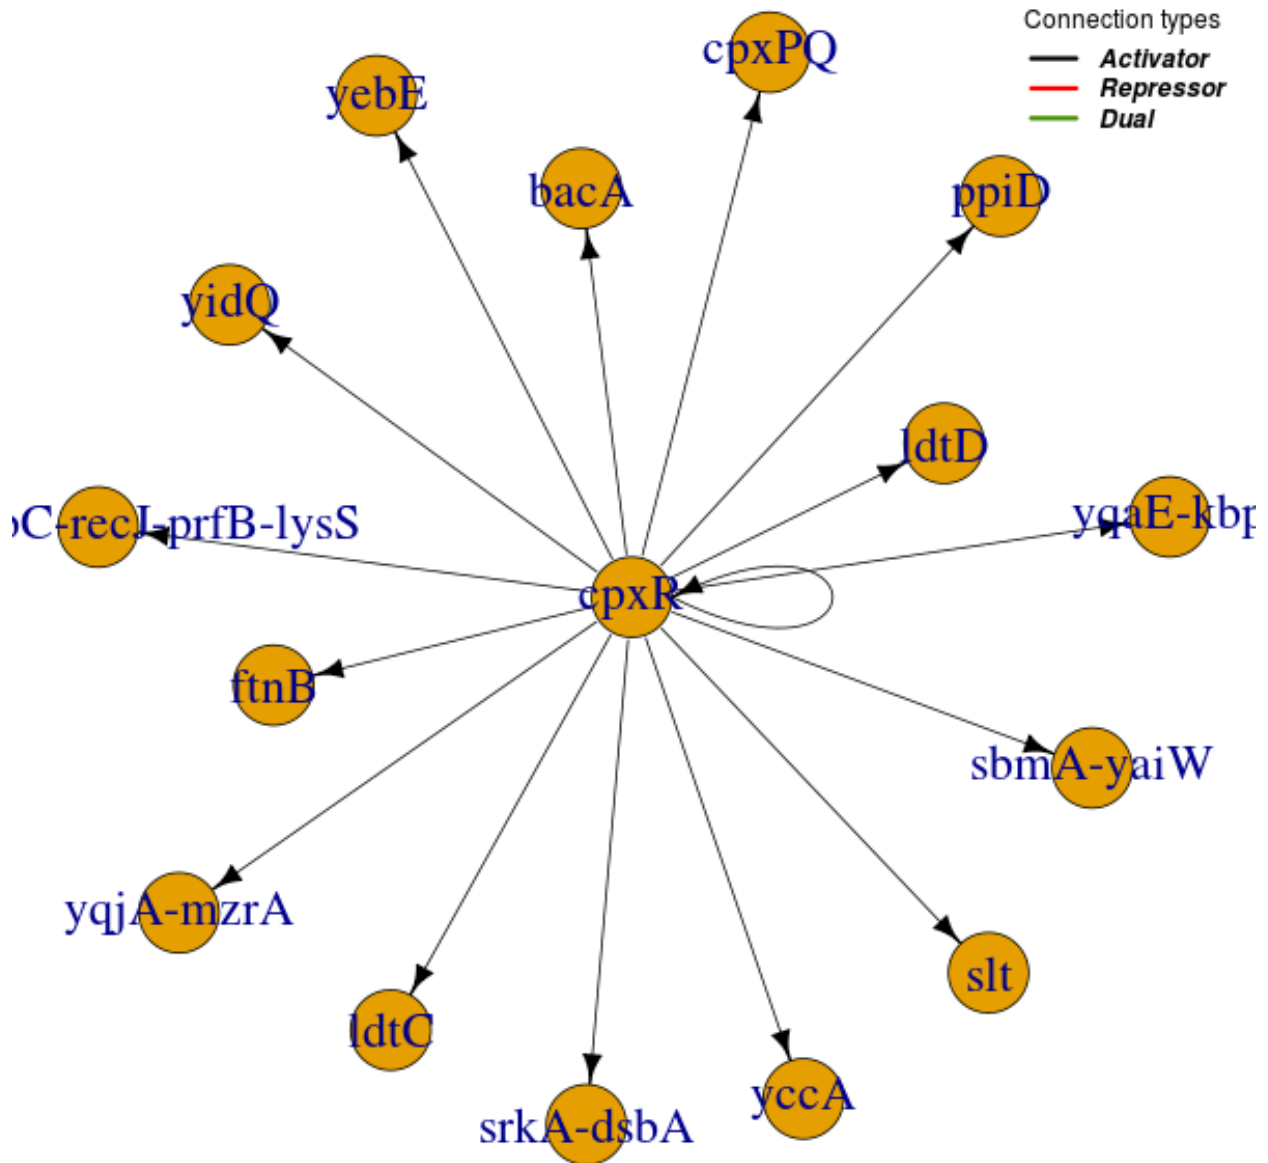

Id = 28

$|n = 1, \ell = 1\rangle$

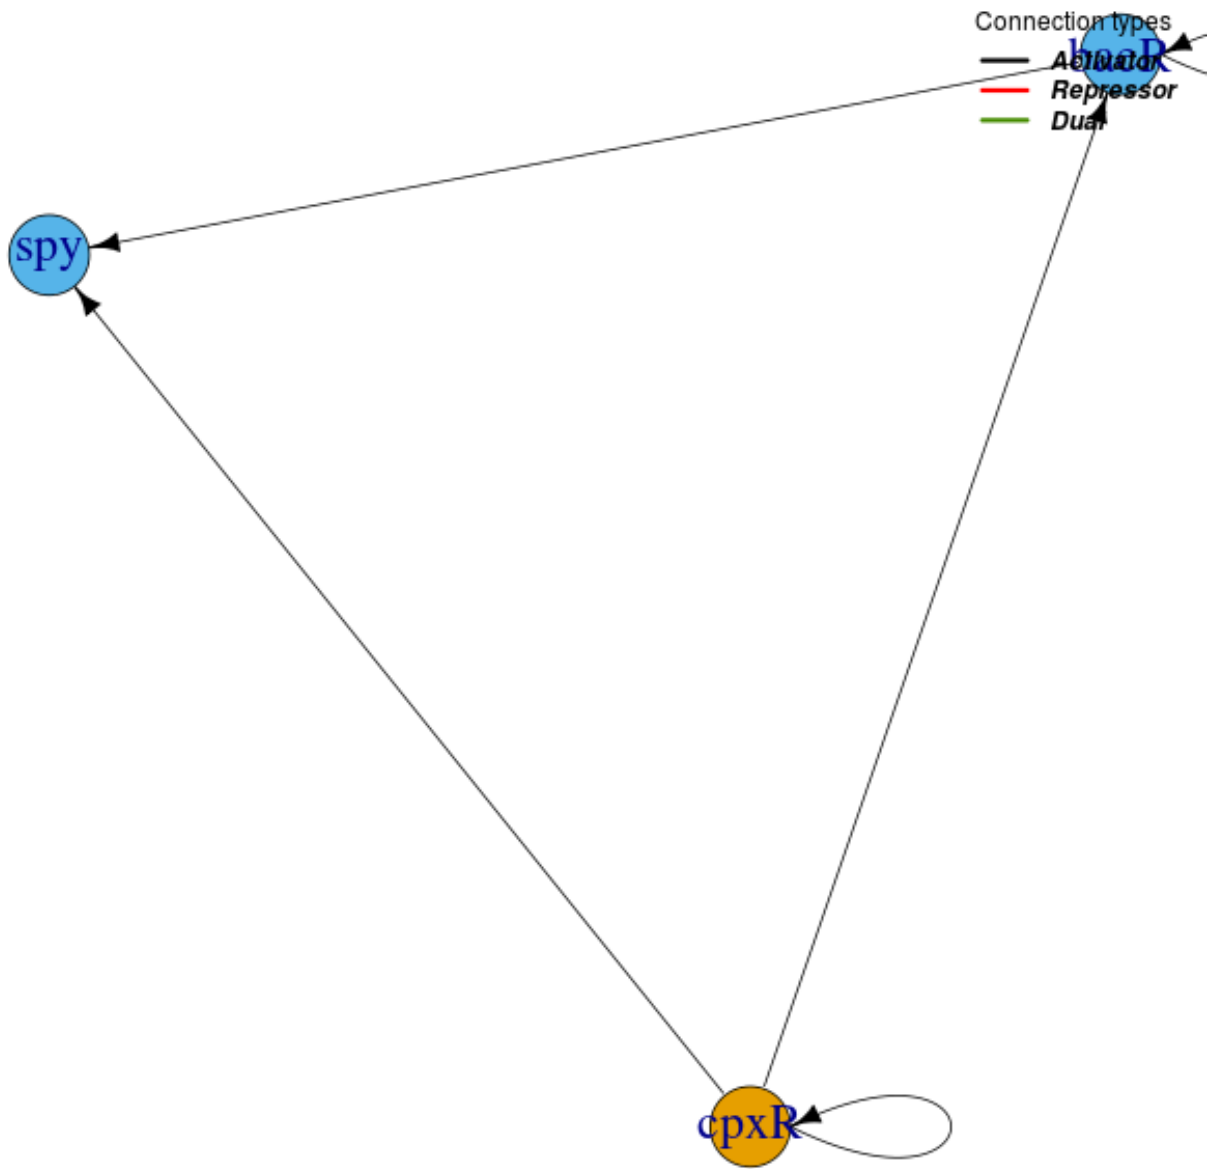

Id = 29

$|n = 0, \ell = 1\rangle$

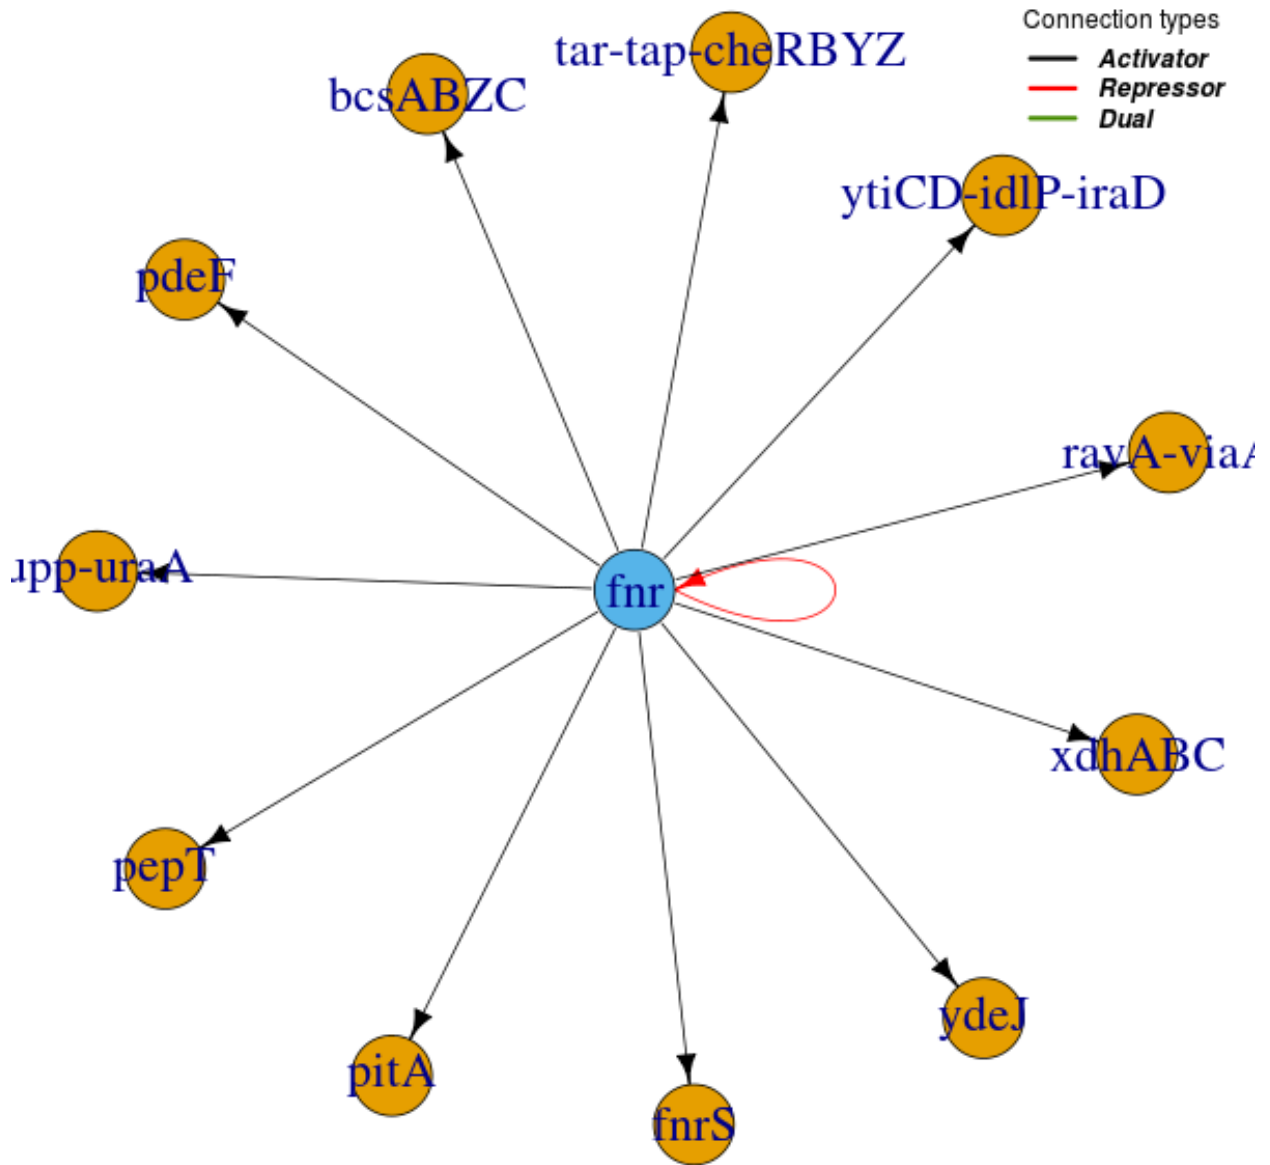

Id = 30

$|n = 0, \ell = 1\rangle$

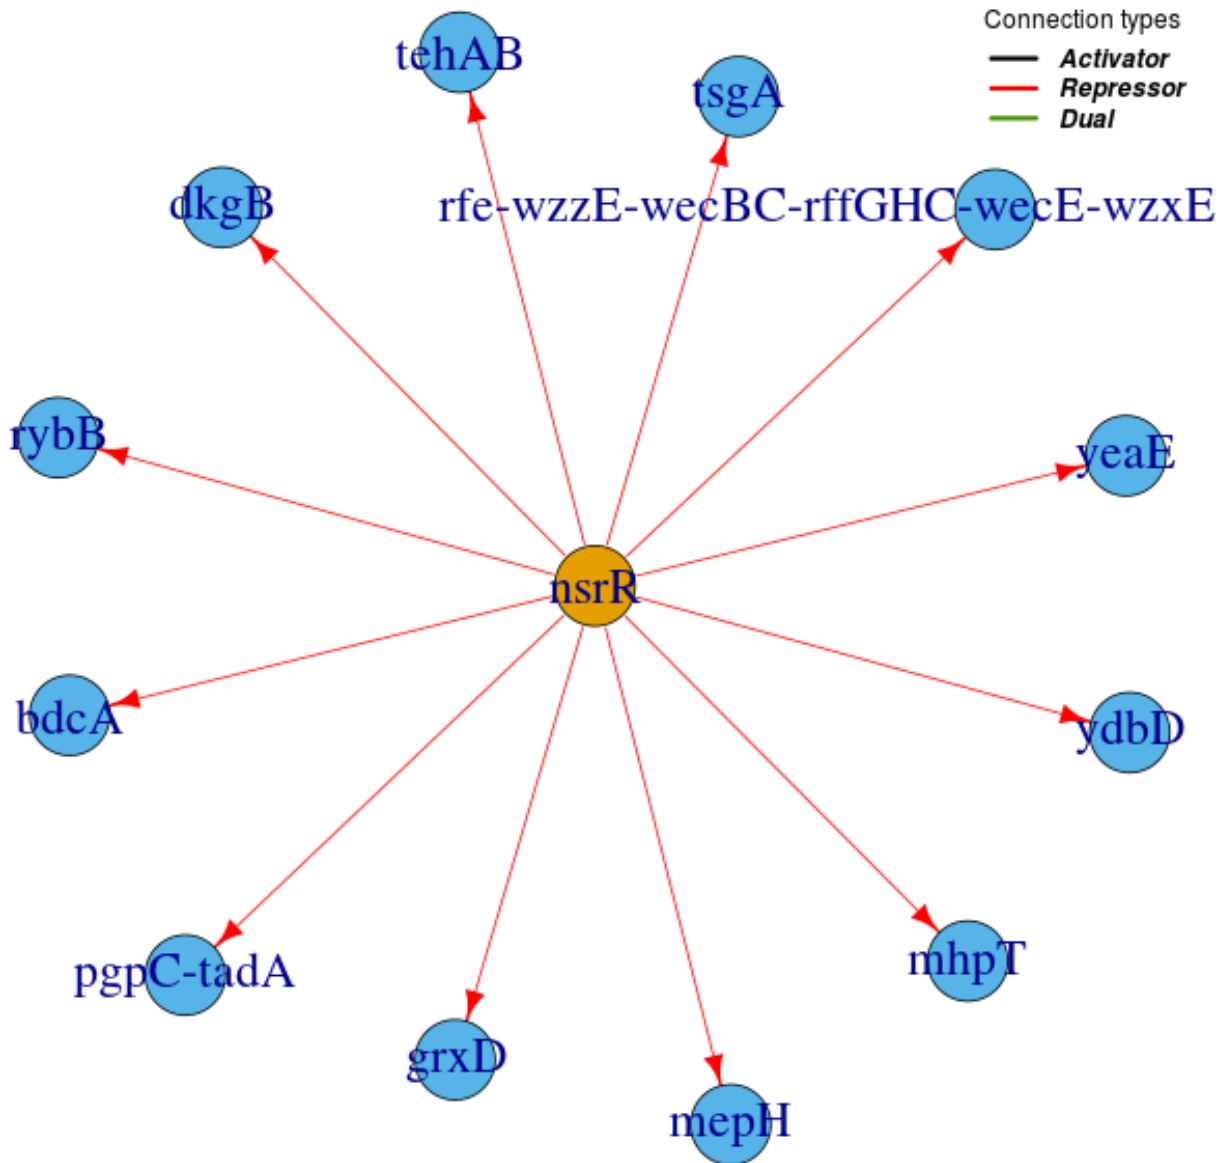

Id = 31

$|n = 1, \ell = 2\rangle$

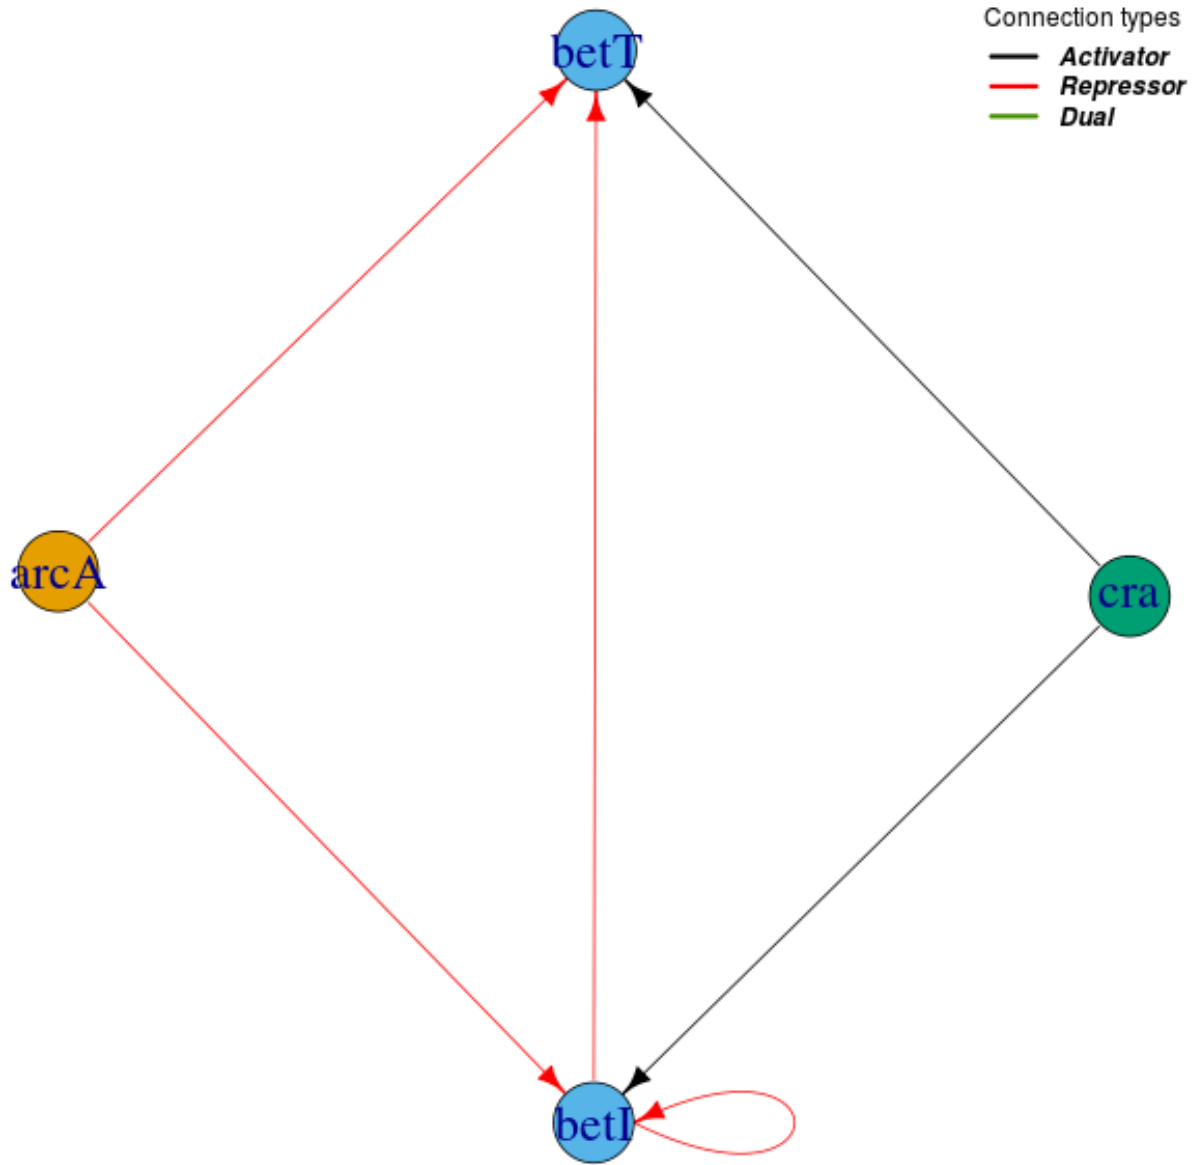

Id = 32

$|n = 0, \ell = 1\rangle$

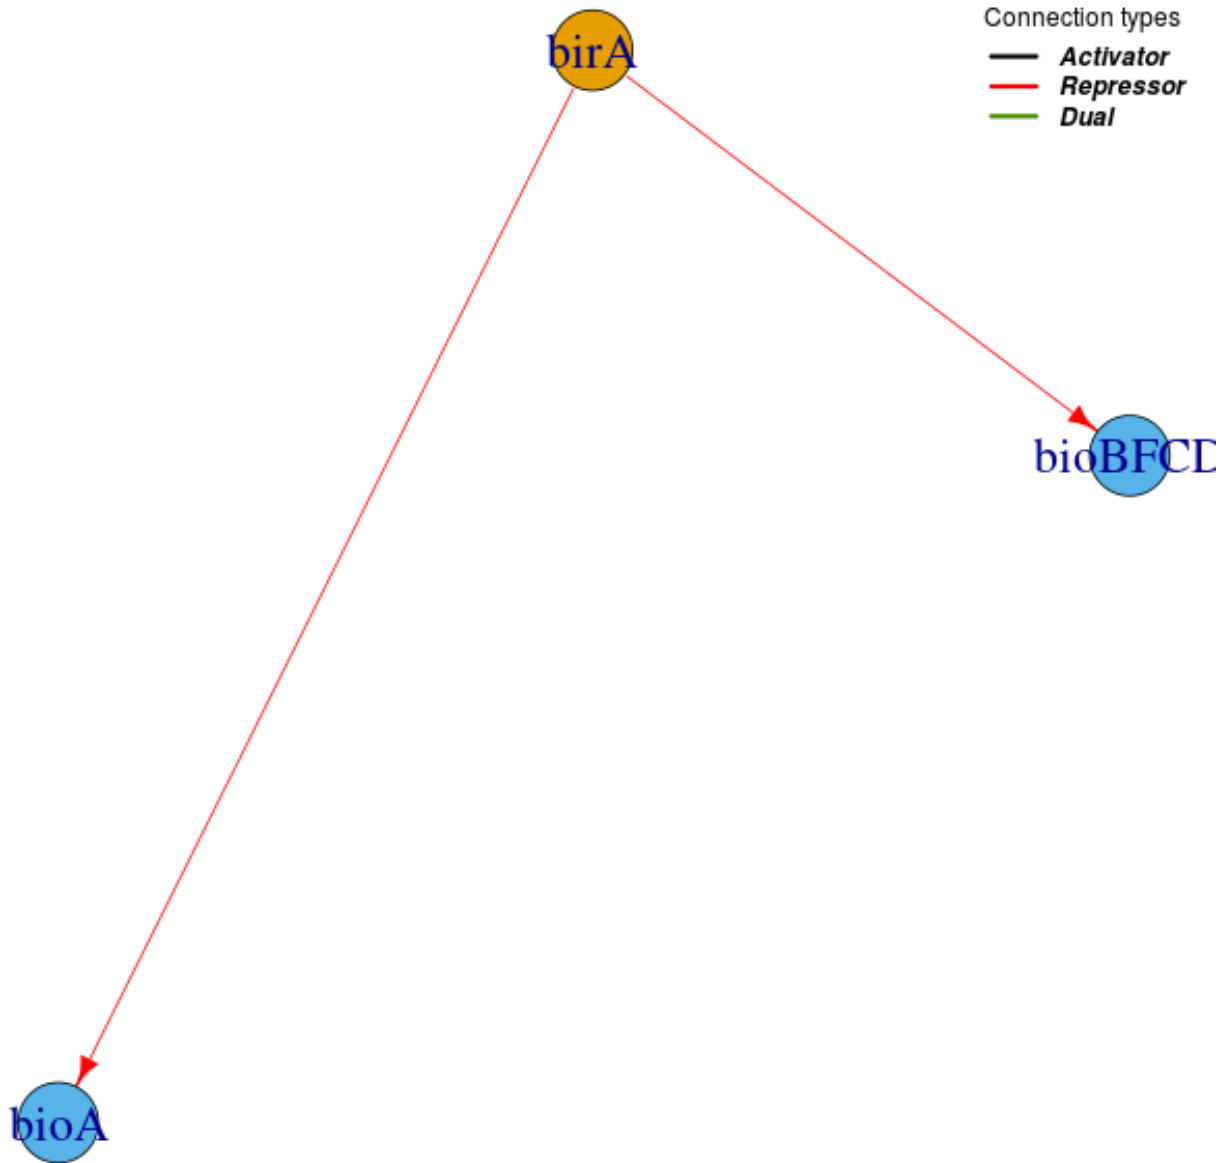



Id = 33

$|n = 0, \ell = 1\rangle$

bluF

Connection types

— *Activator*

— *Repressor*

— *Dual*

rcdA

ydeI

Id = 34

$|n = 0, \ell = 1\rangle$

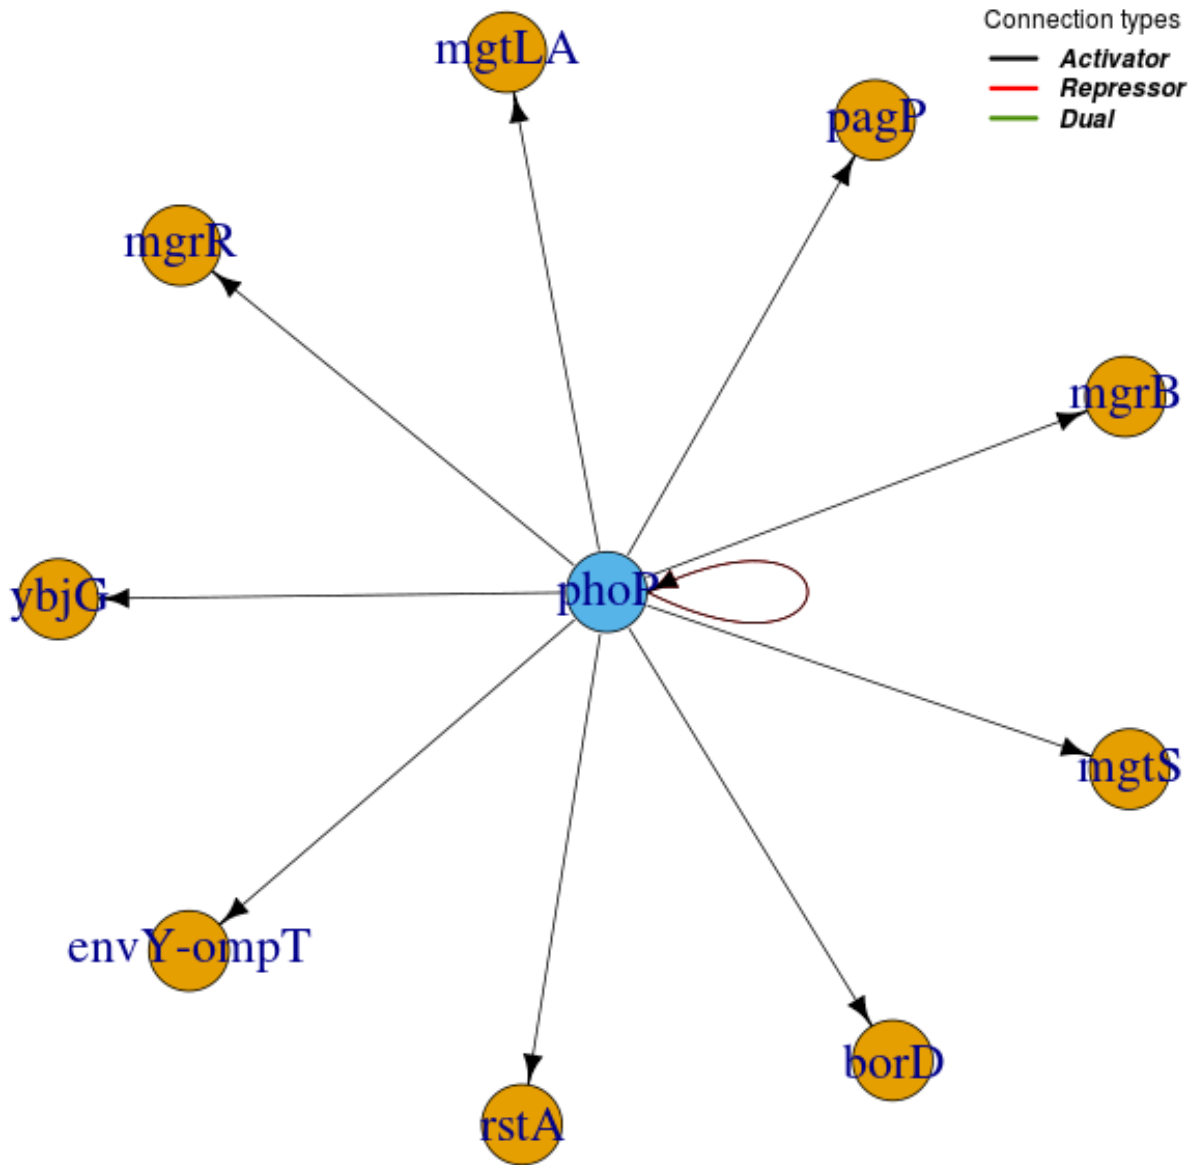

Id = 35

$|n = 0, \ell = 1\rangle$

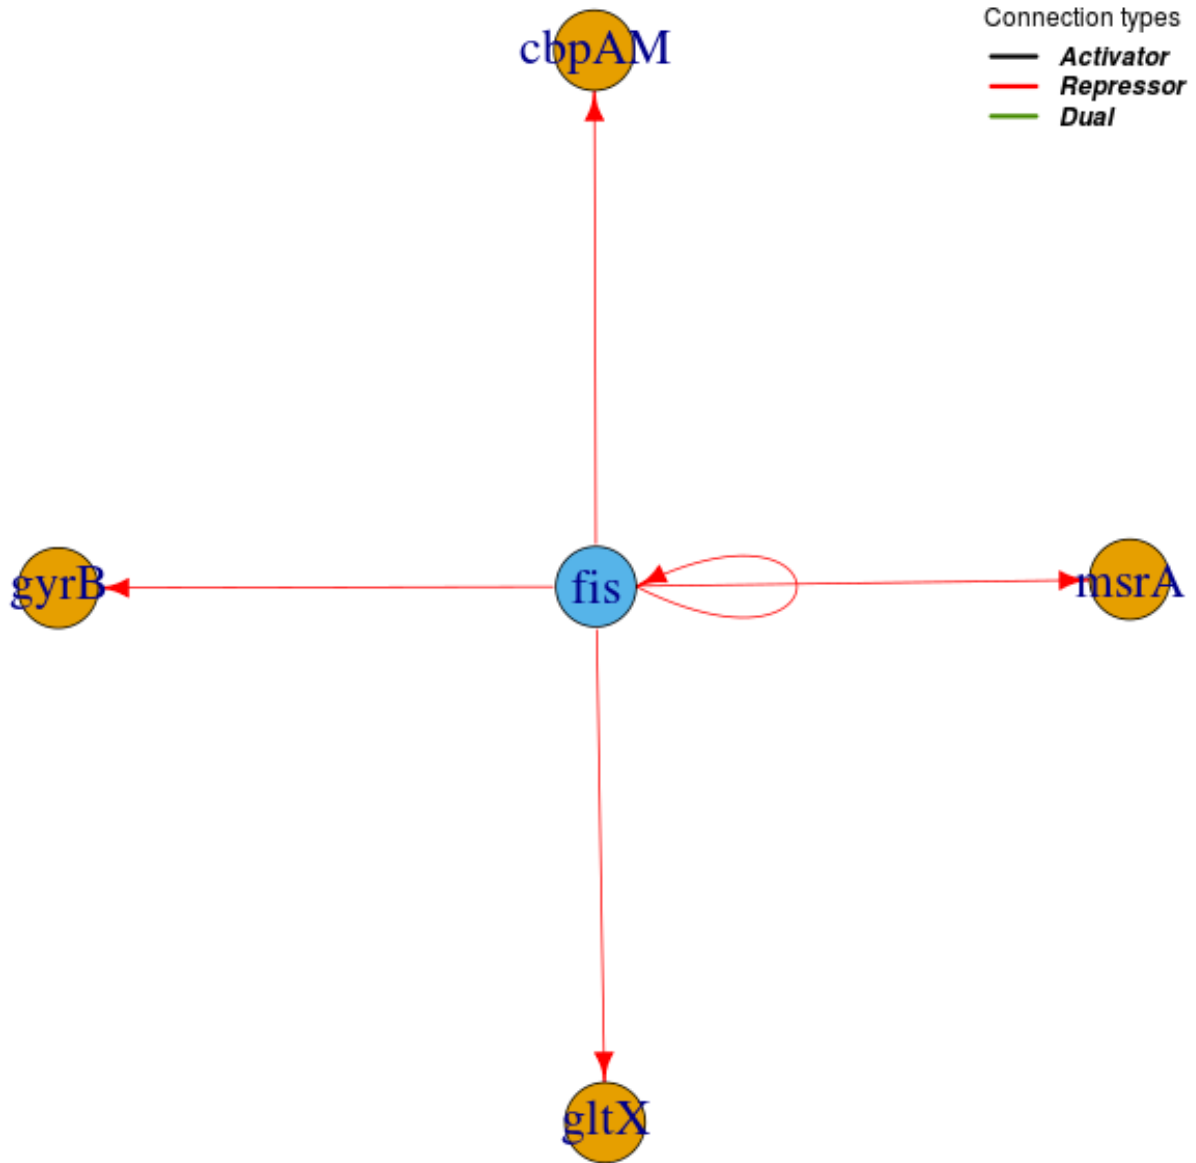

Id = 36

$|n = 1, \ell = 0\rangle$

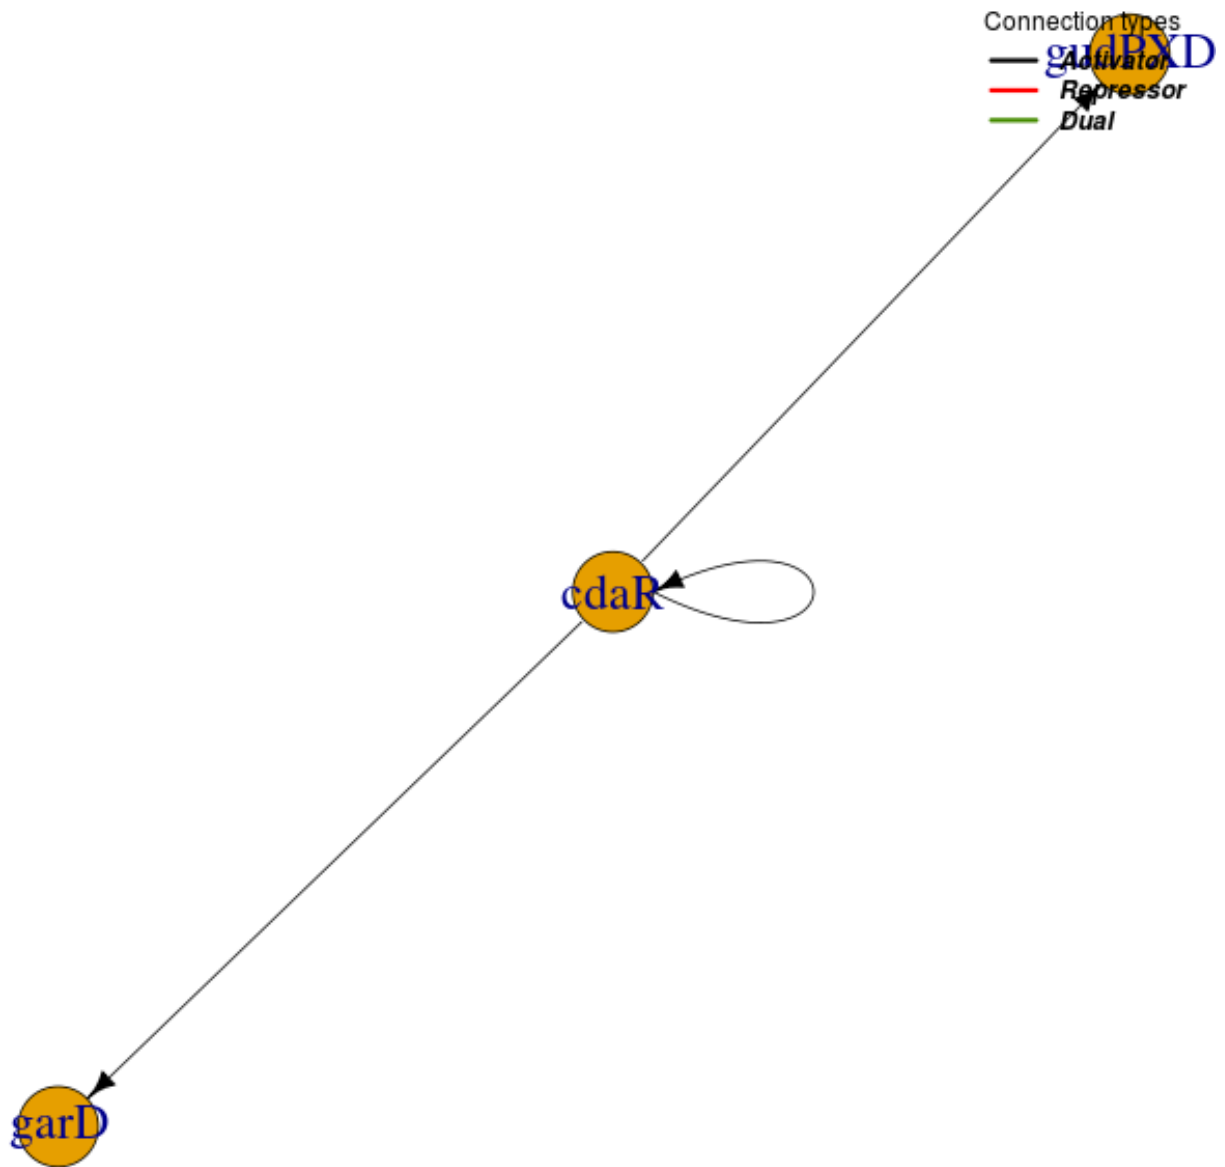

Id = 37

$|n = 1, \ell = 0\rangle$

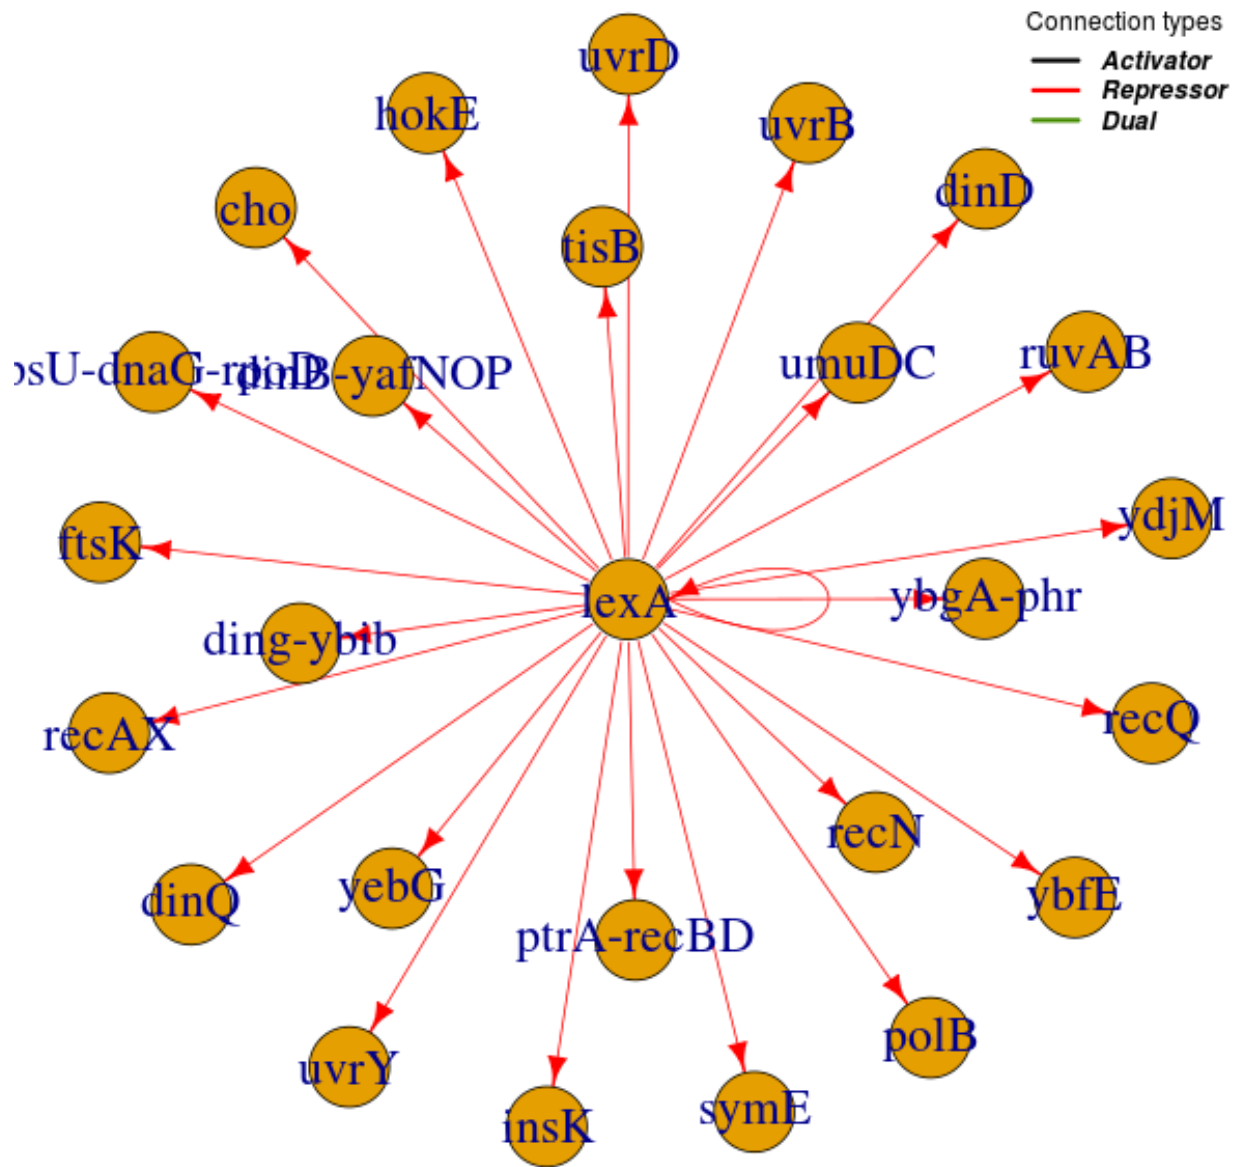

Id = 38

$|n = 0, \ell = 2\rangle$

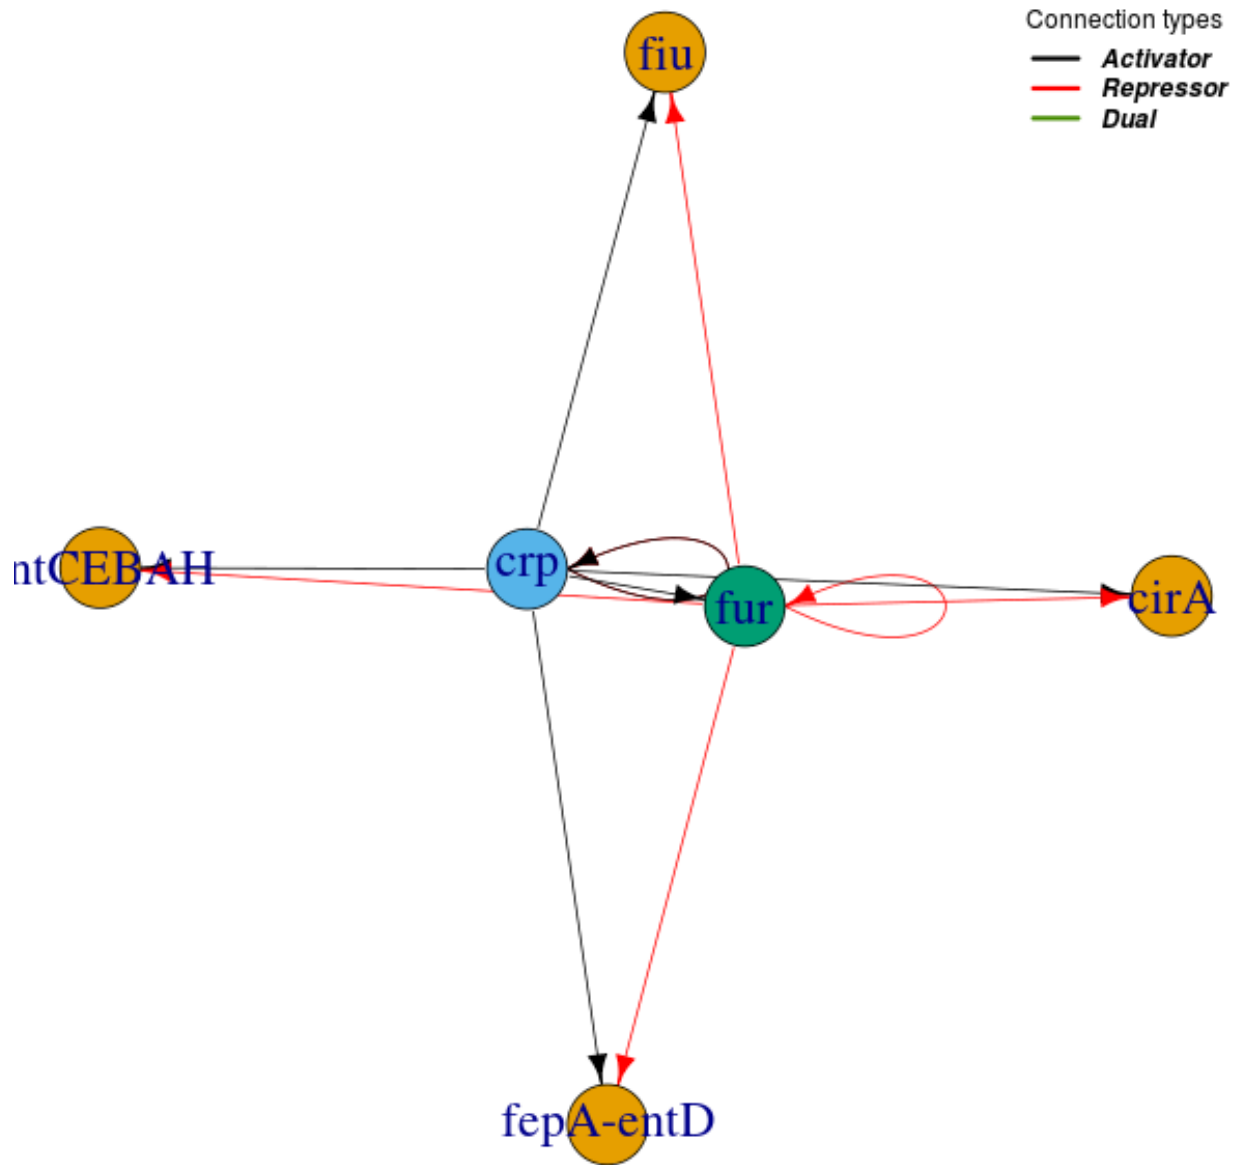

Id = 39

$|n = 0, \ell = 1\rangle$

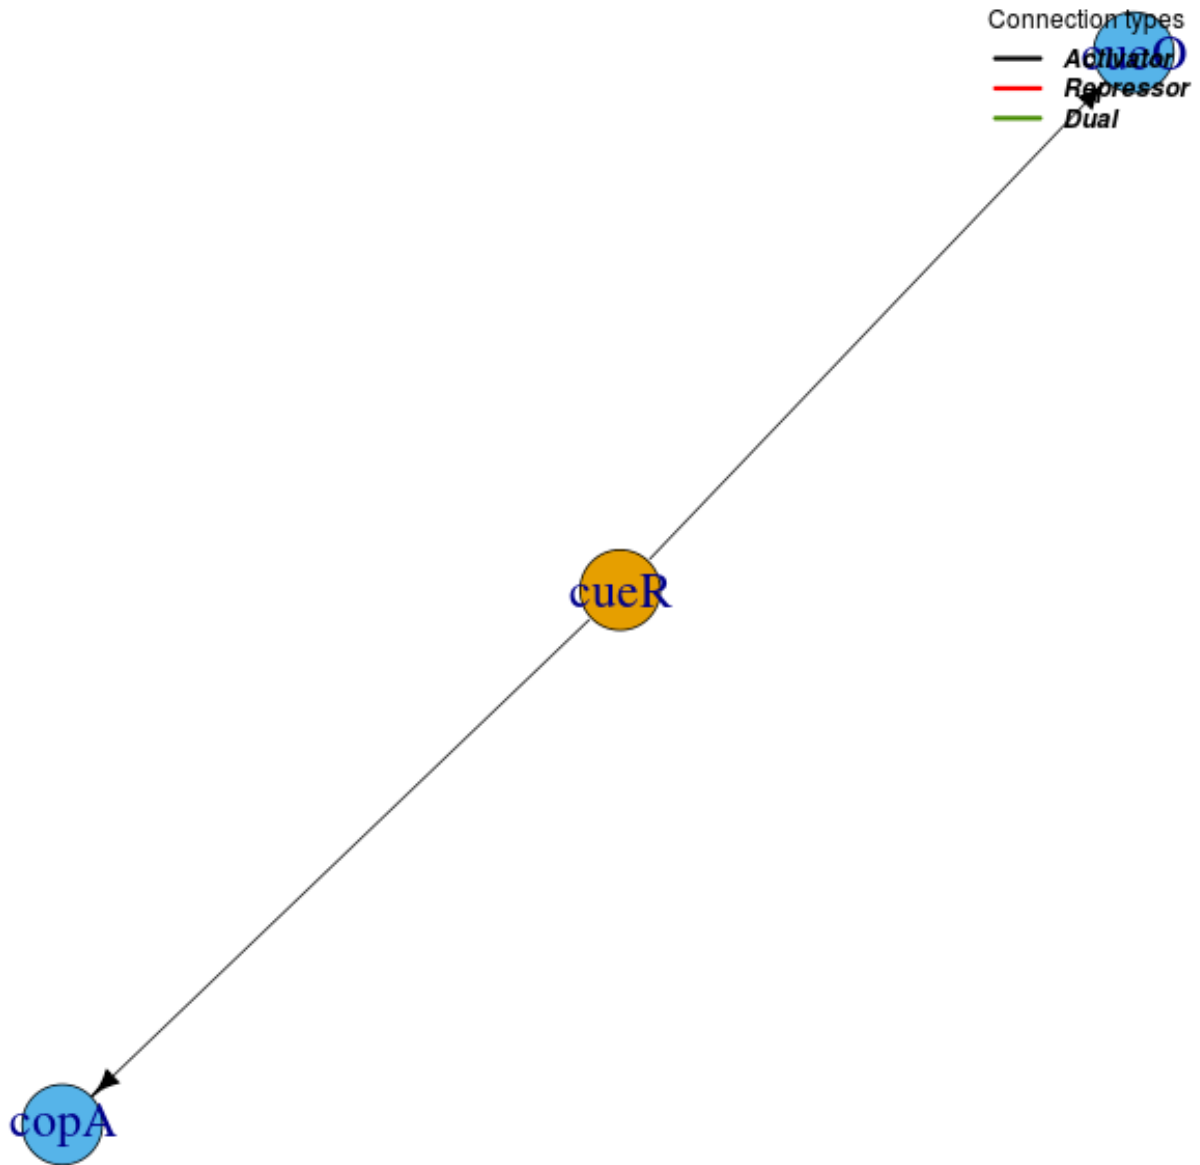

Id = 40

$|n = 0, \ell = 1\rangle$

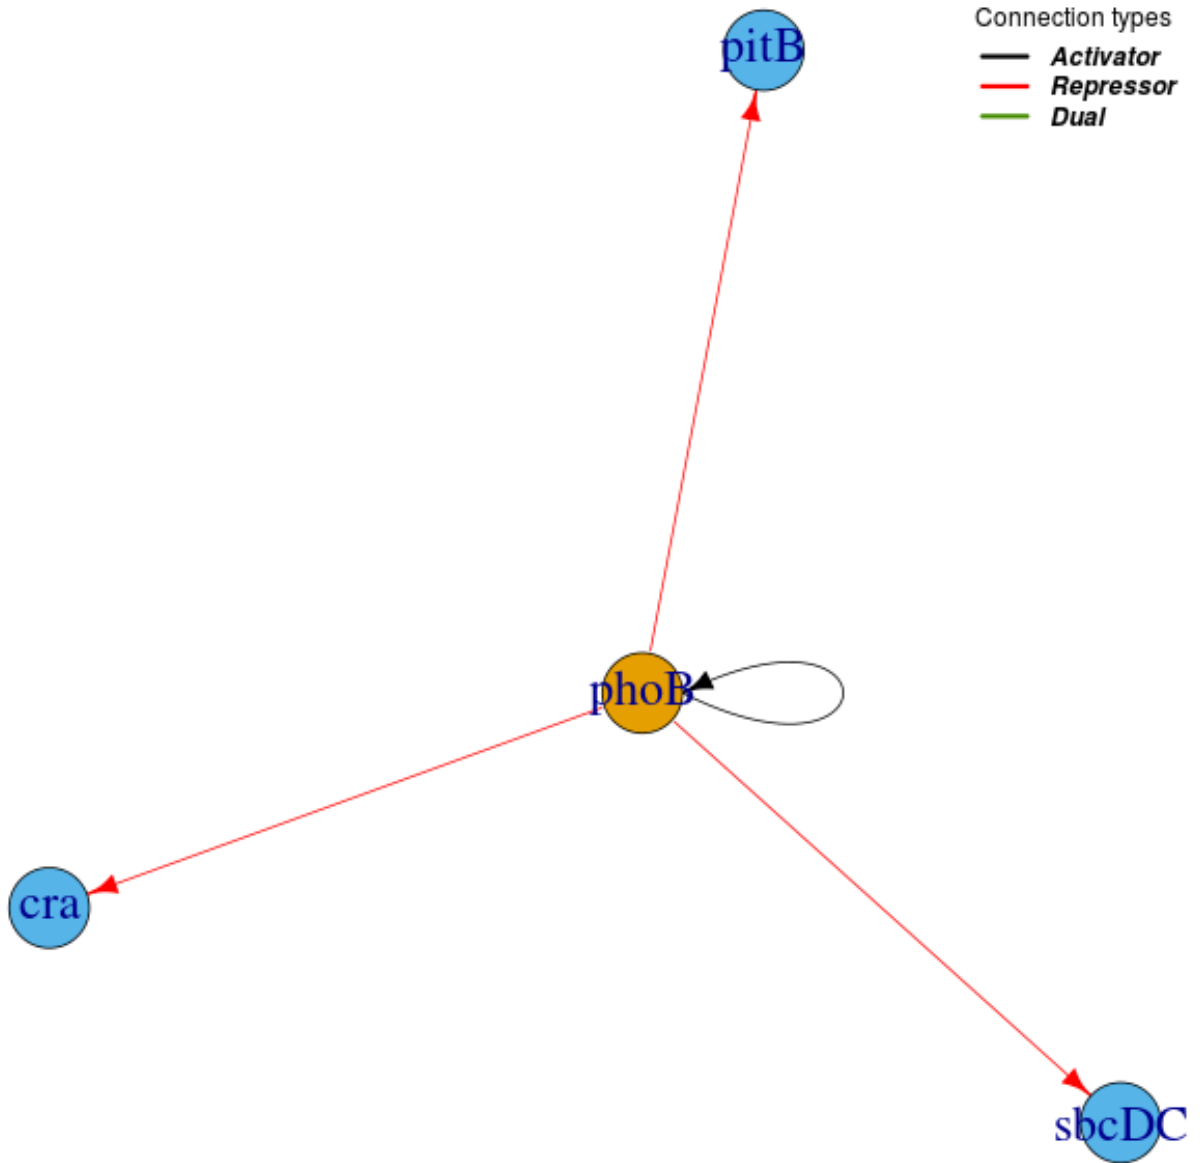



Id = 41

$|n = 0, \ell = 1\rangle$

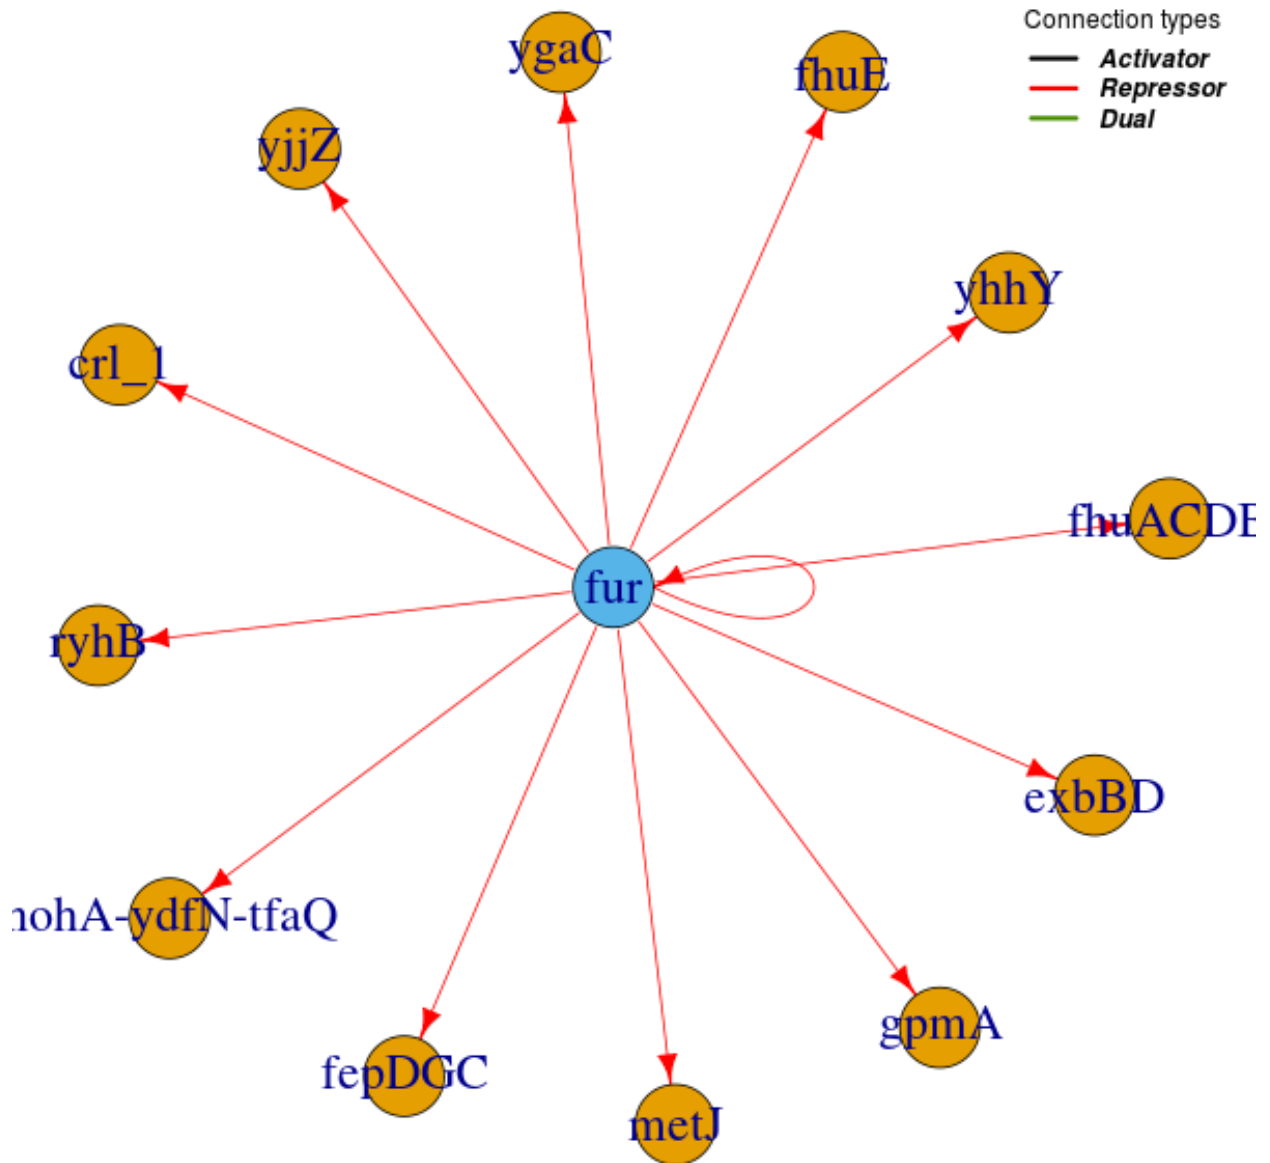

Id = 42

$|n = 1, \ell = 2\rangle$

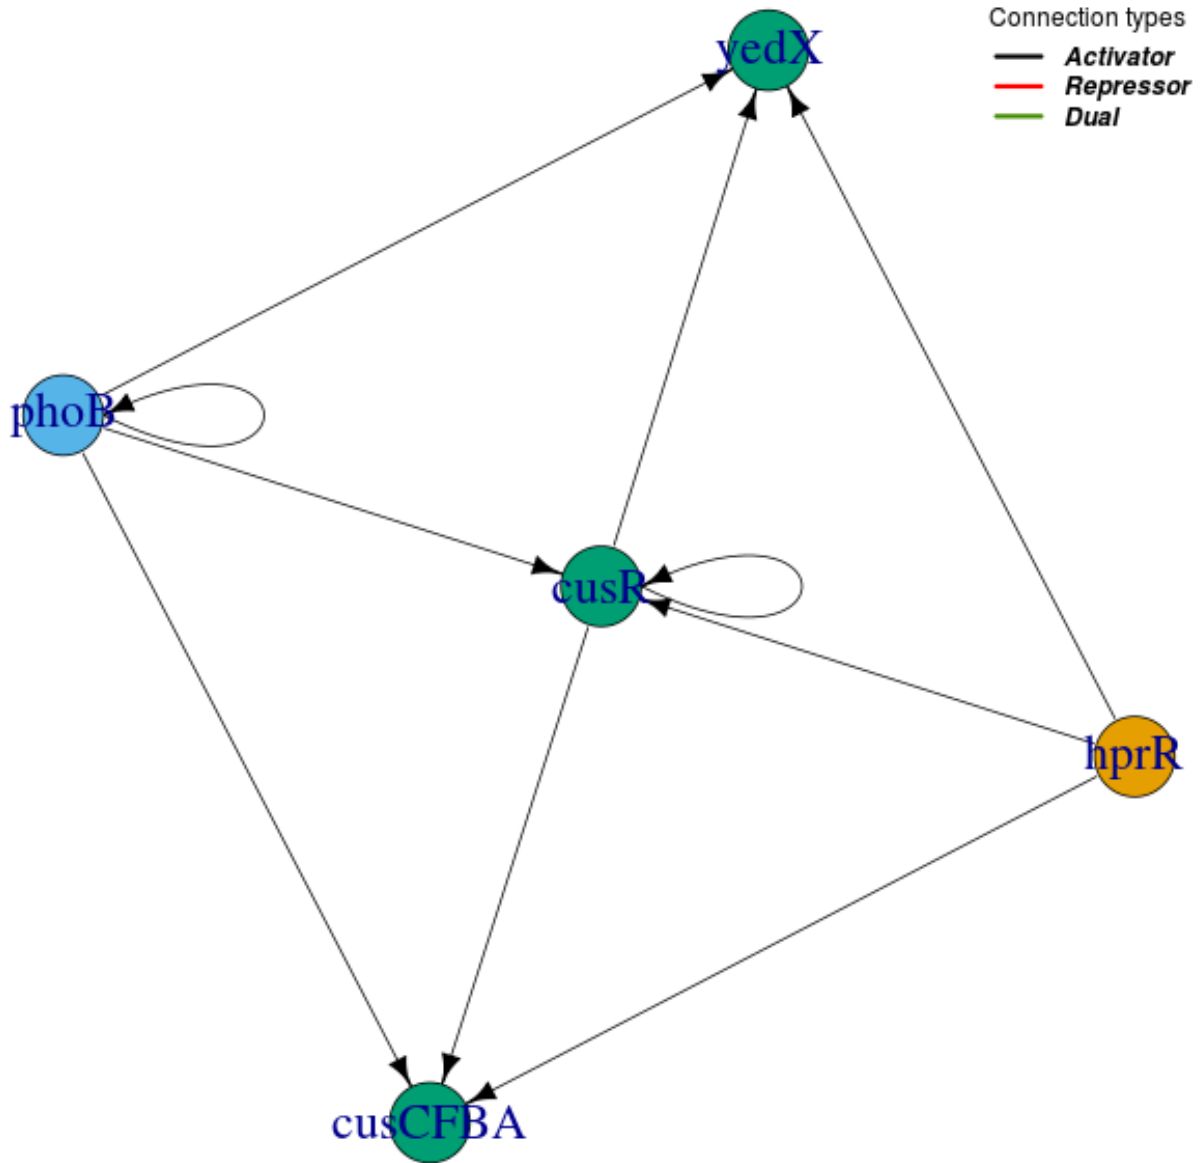

Id = 43

$|n = 0, \ell = 1\rangle$

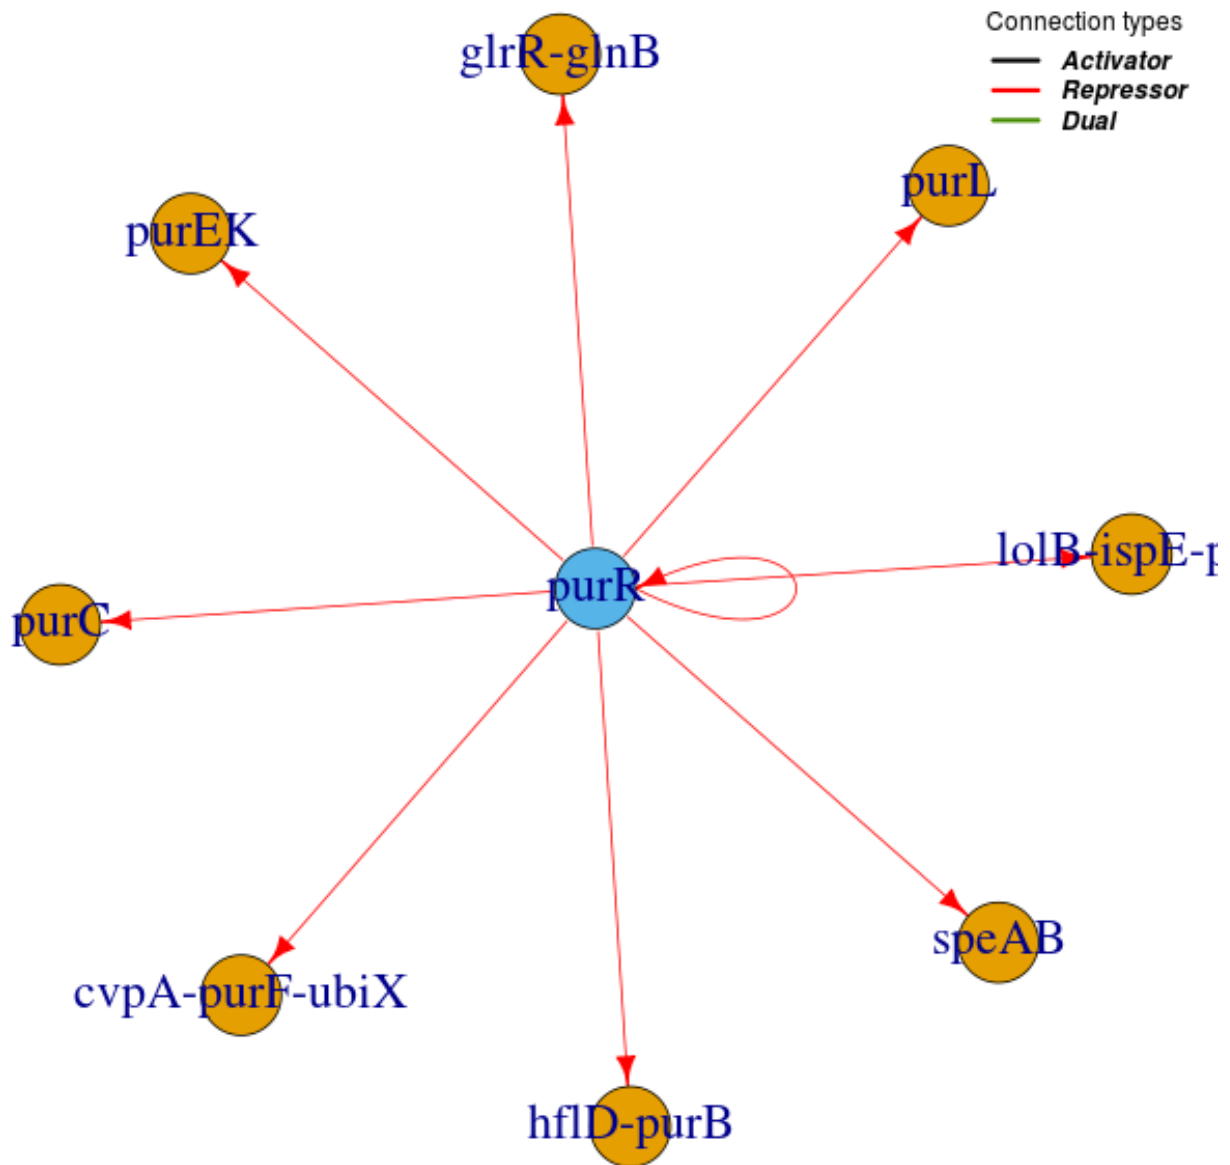

Id = 44

$|n = 0, \ell = 1\rangle$

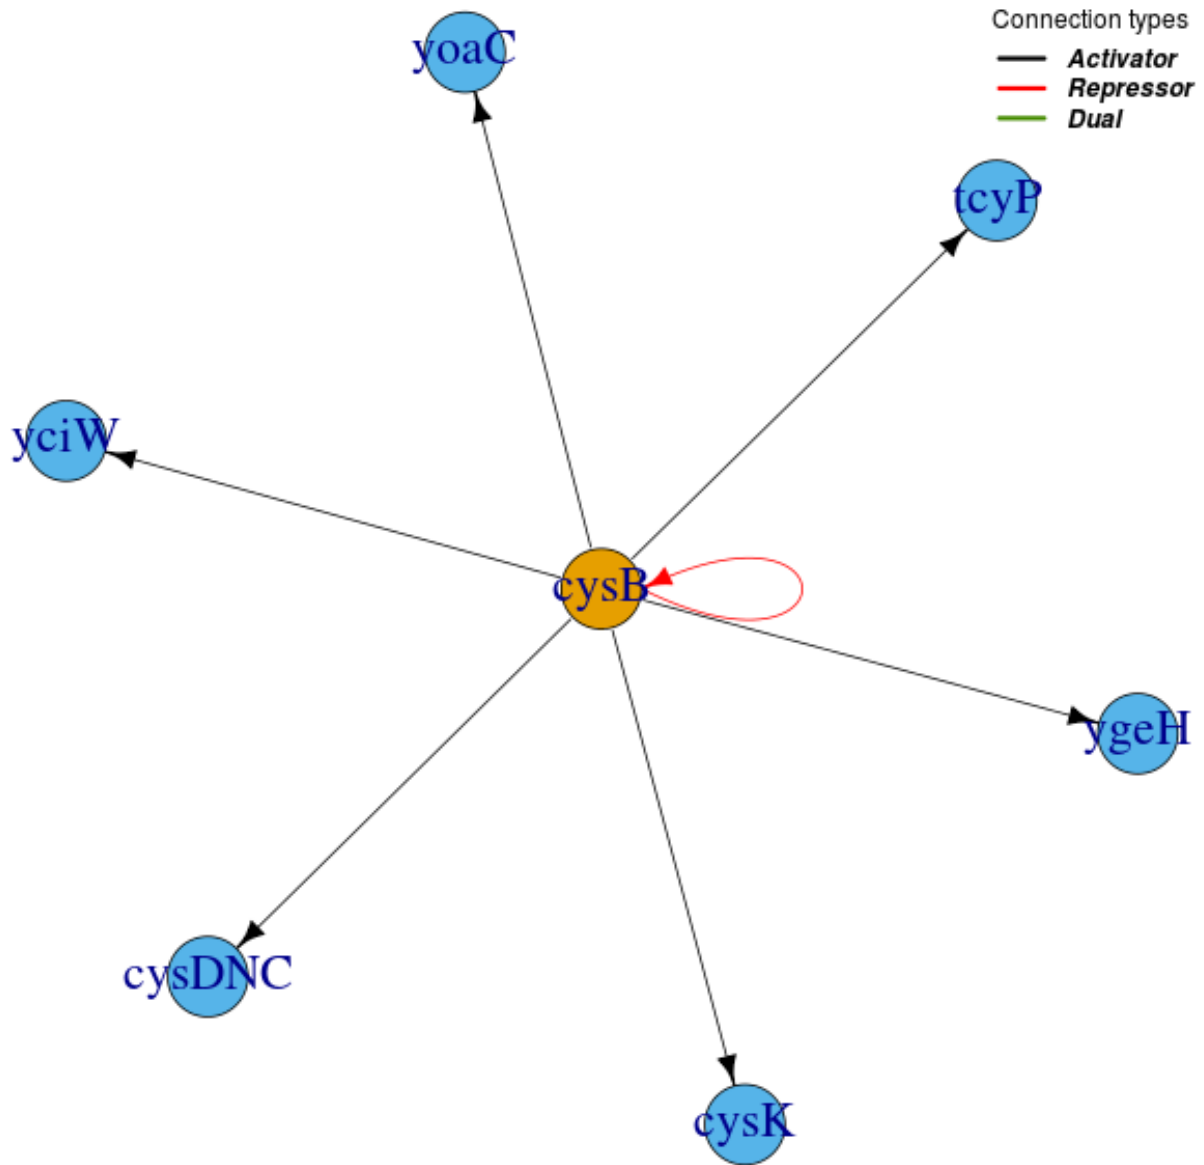

Id = 45

$|n = 1, \ell = 1\rangle$

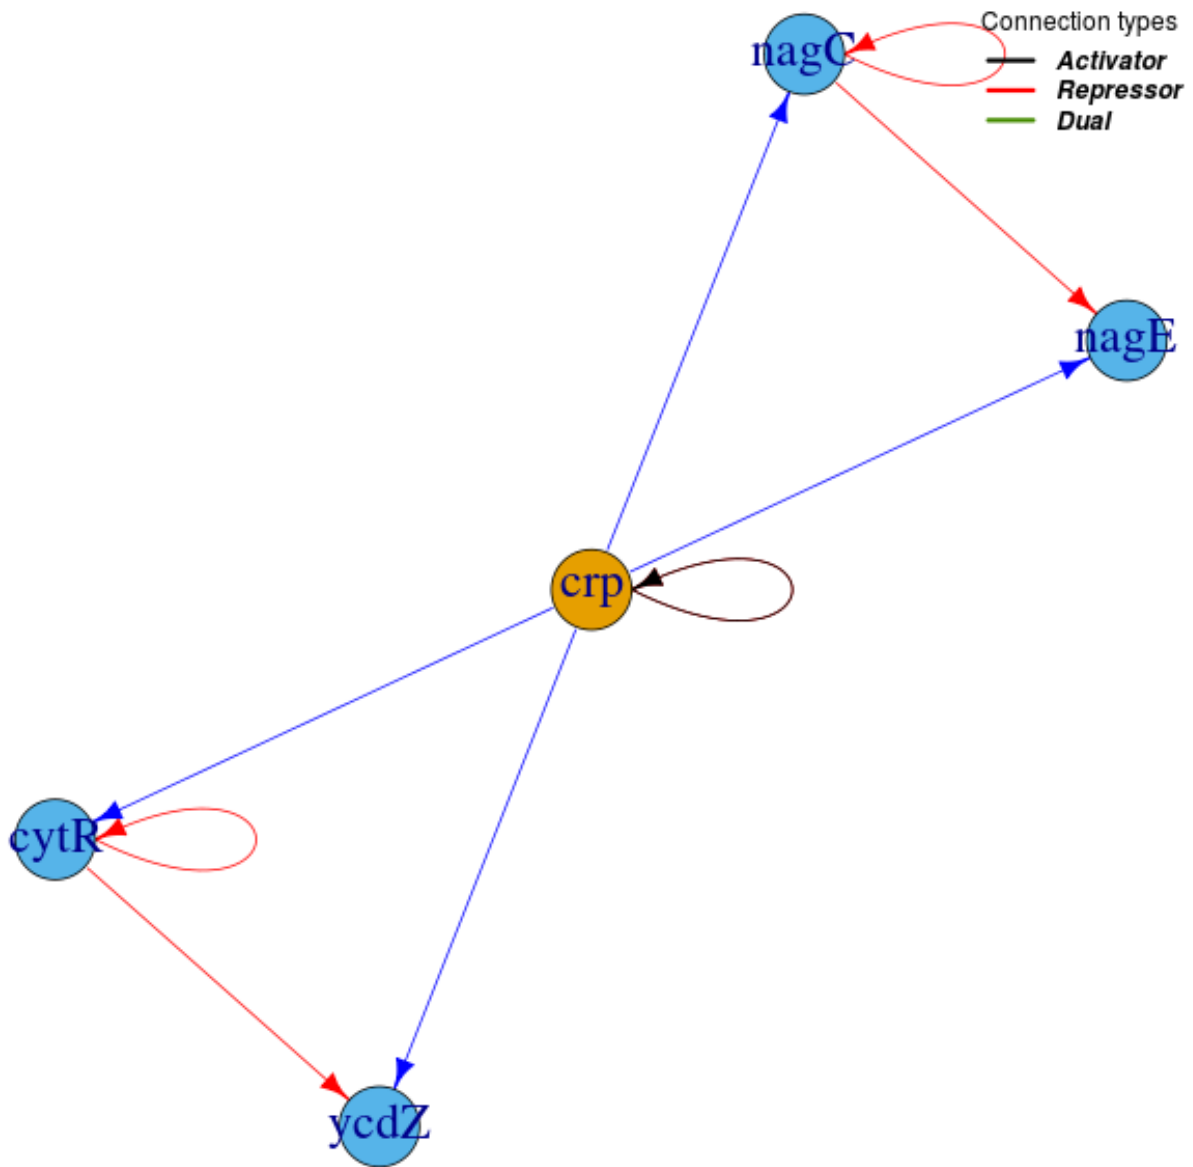

Id = 46

$|n = 0, \ell = 1\rangle$

IysC

Connection types

— *Activator*

— *Repressor*

— *Dual*

argP

dapB

Id = 47

$|n = 0, \ell = 1\rangle$

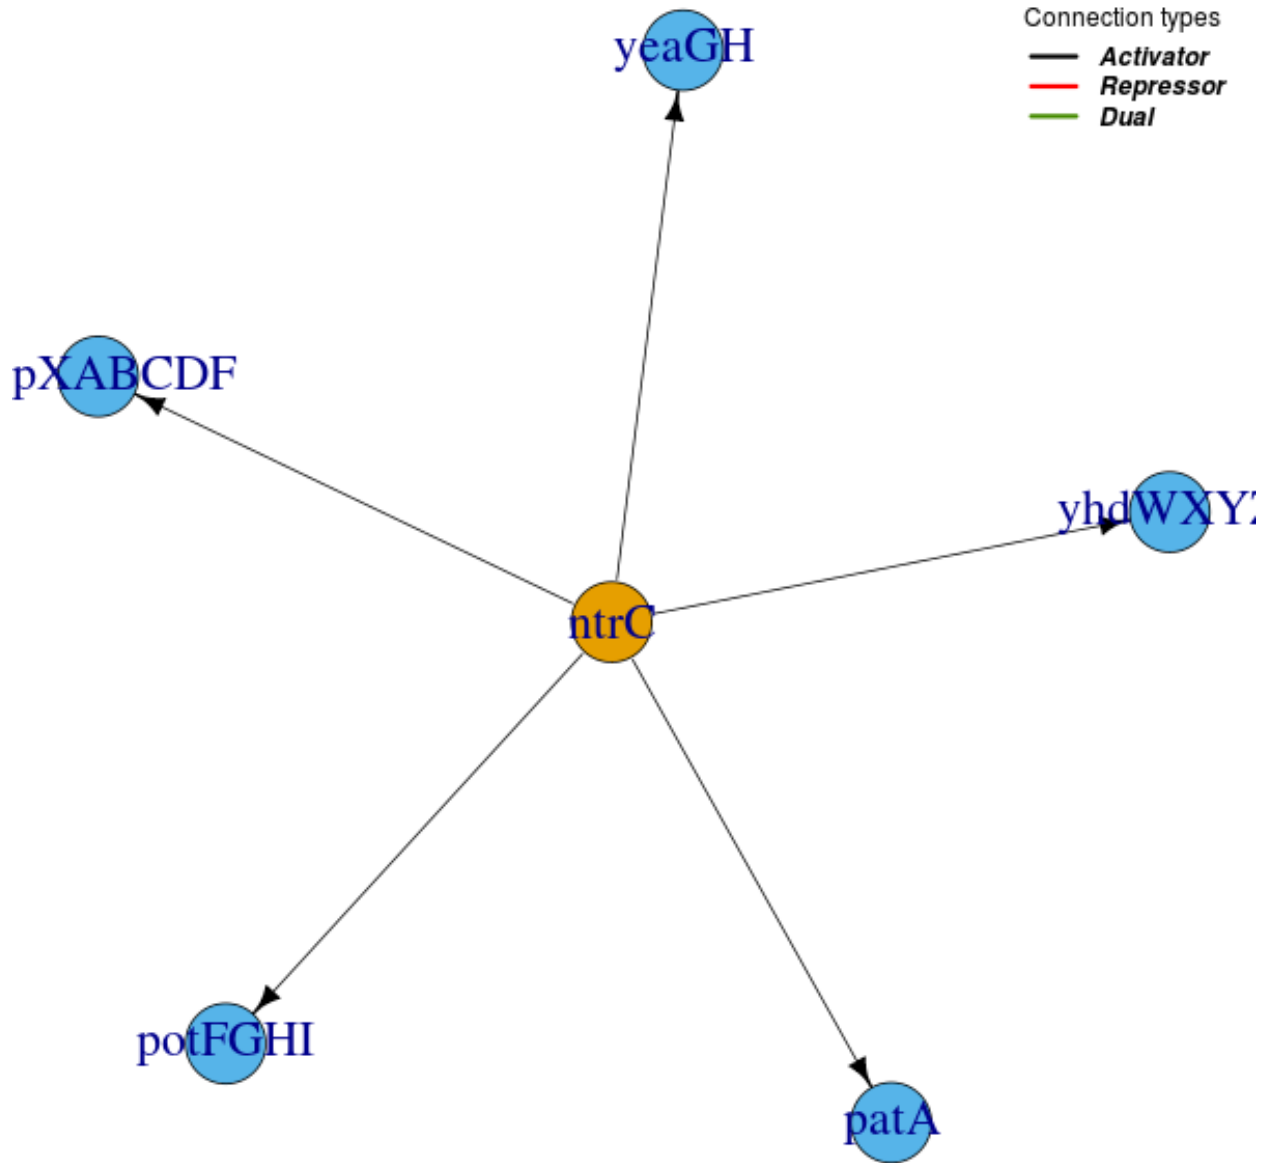

Id = 48

$|n = 0, \ell = 1\rangle$

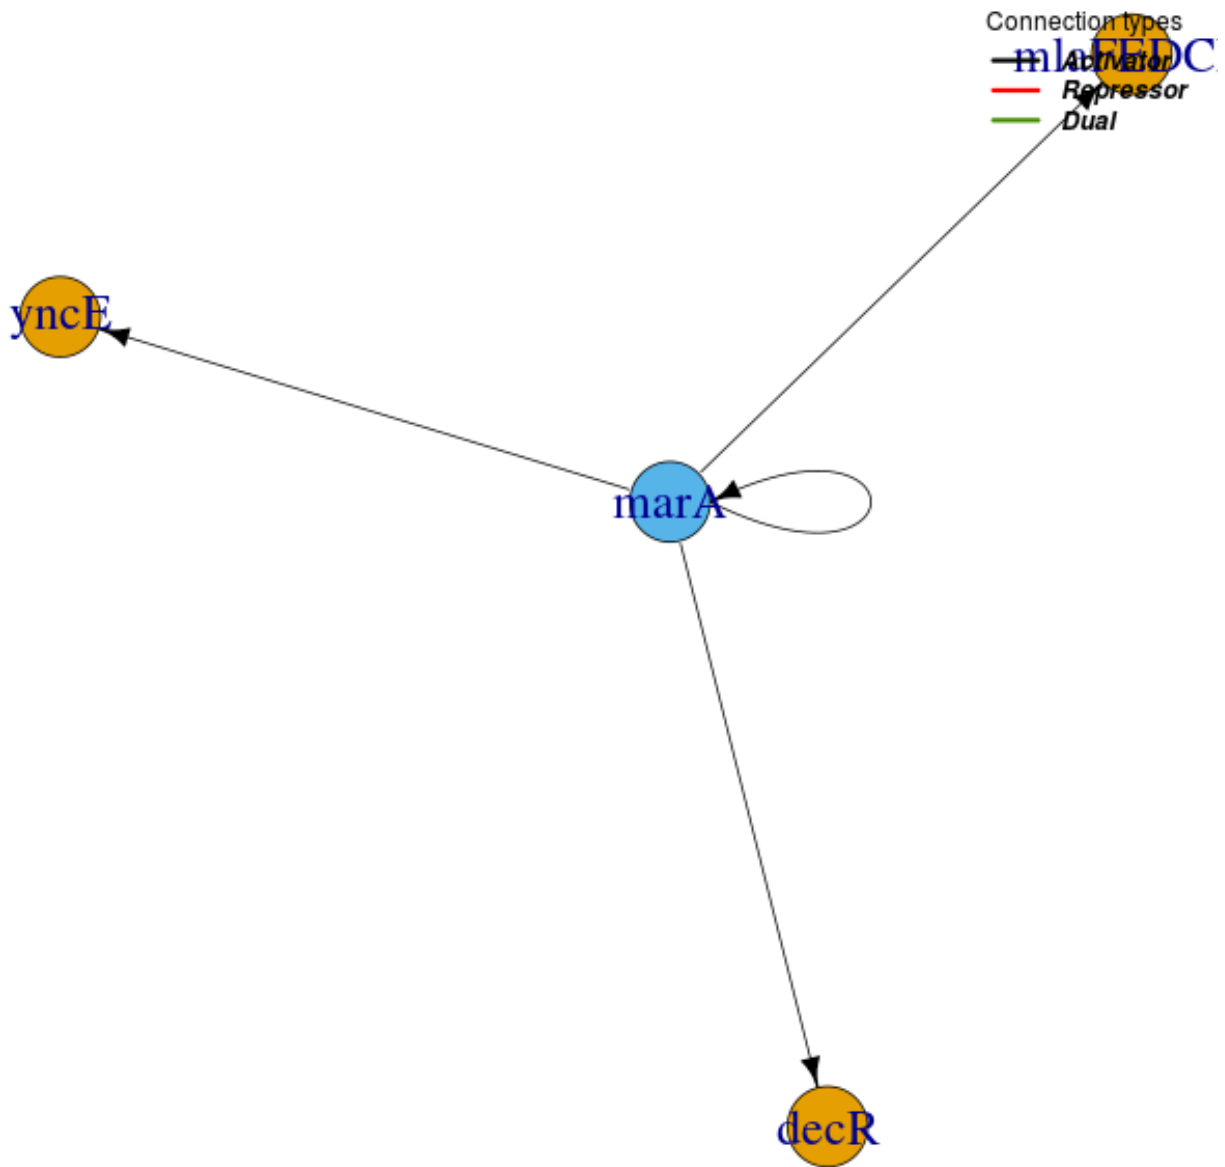



Id = 49

$|n = 0, \ell = 1\rangle$

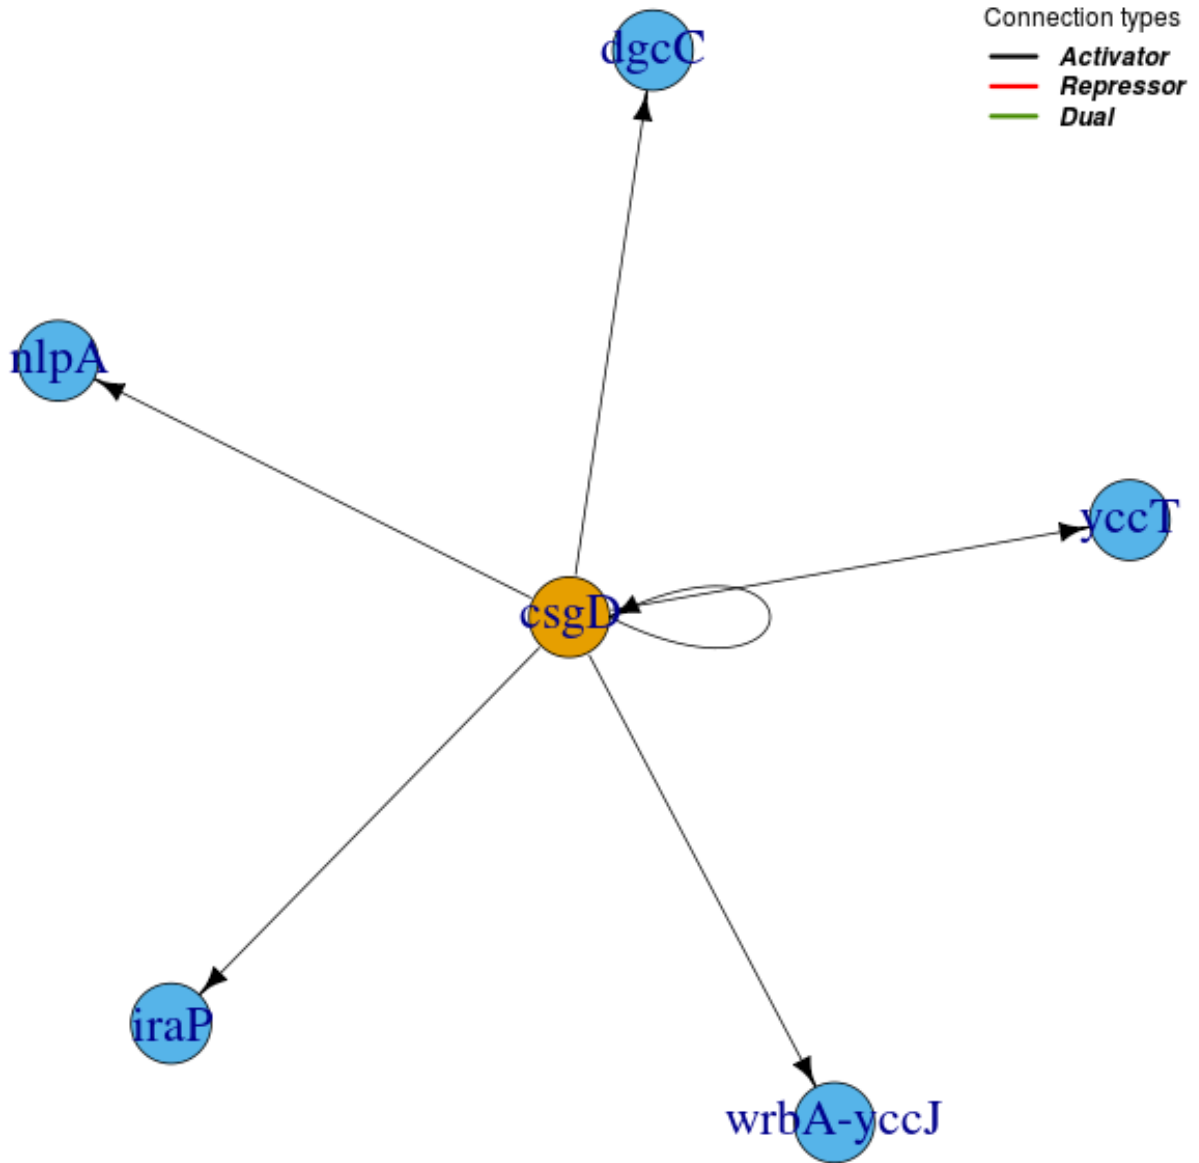

Id = 50

$|n = 0, \ell = 1\rangle$

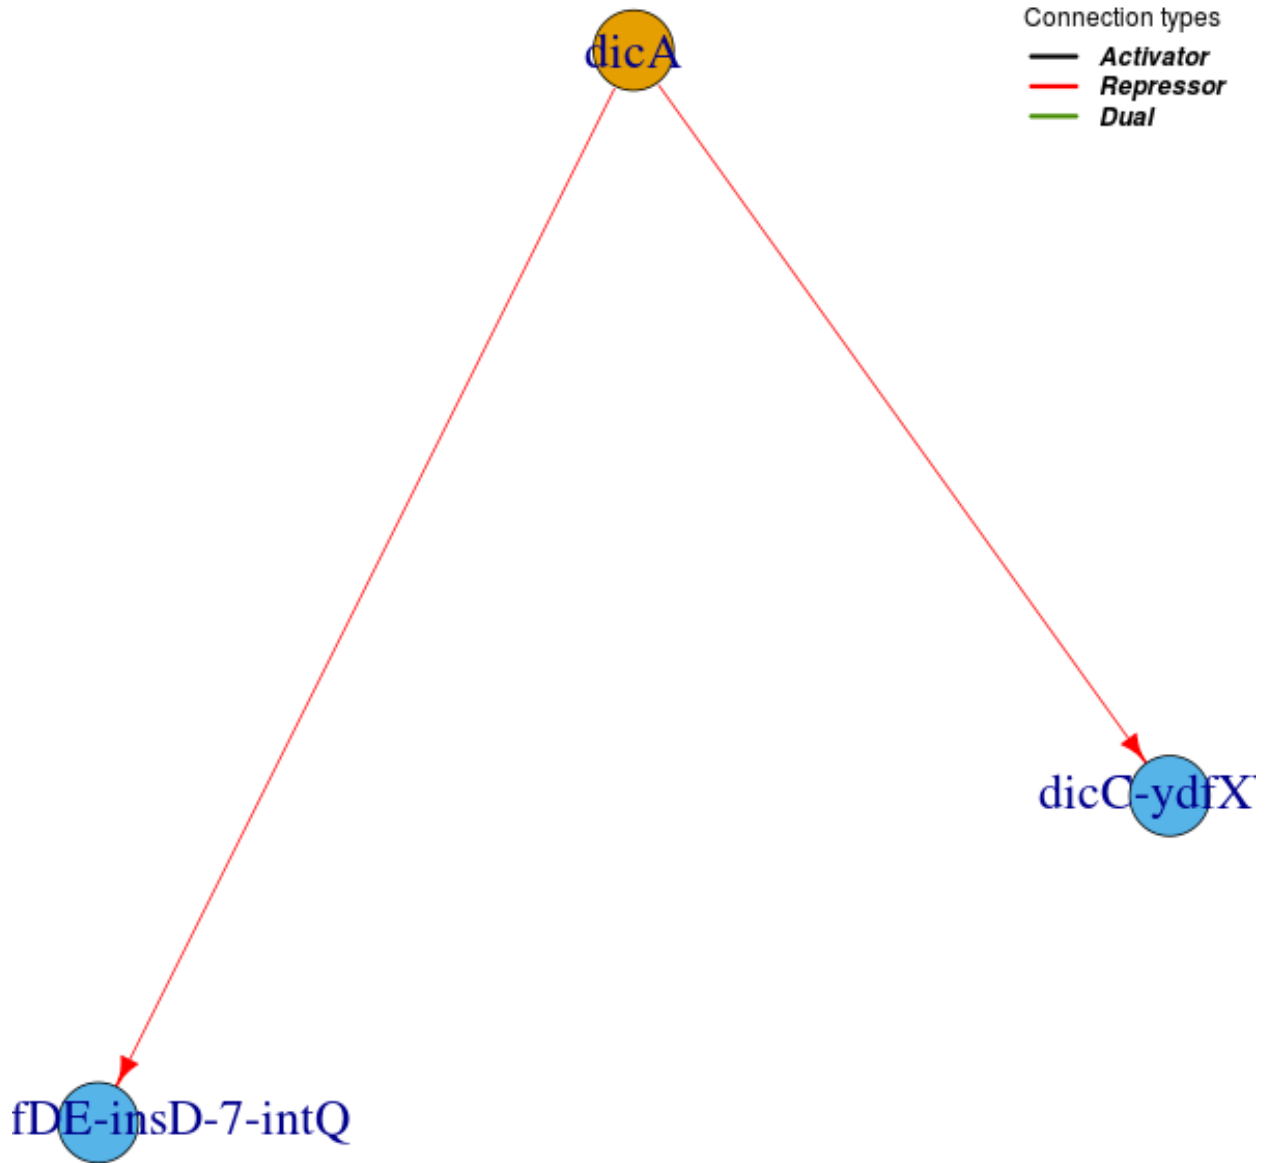

Id = 51

$|n = 1, \ell = 1\rangle$

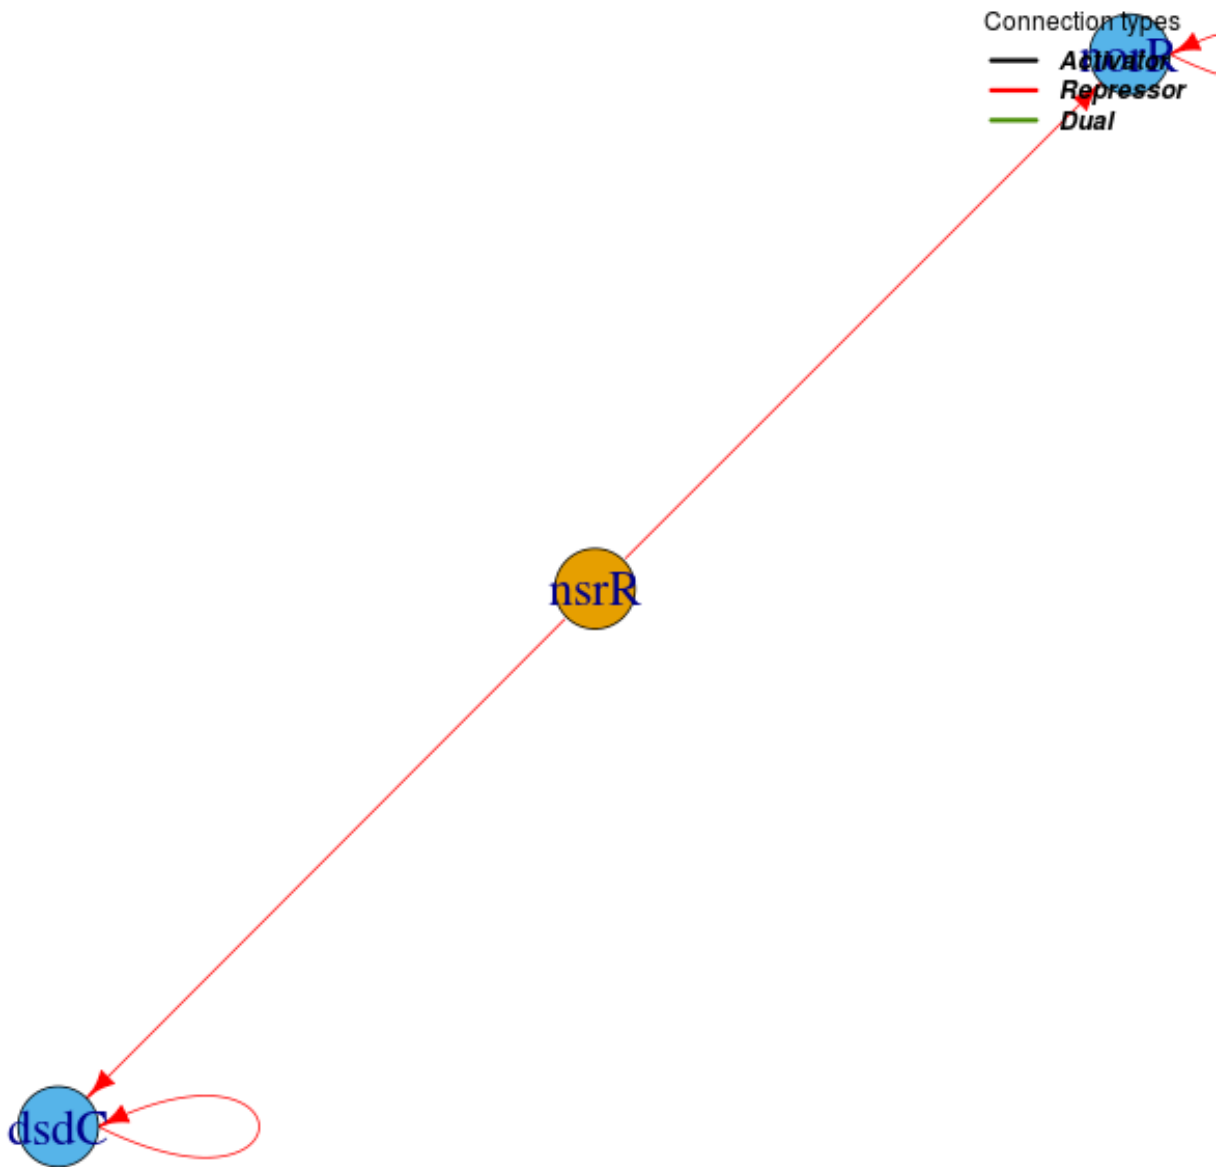

Id = 52

$|n = 0, \ell = 1\rangle$

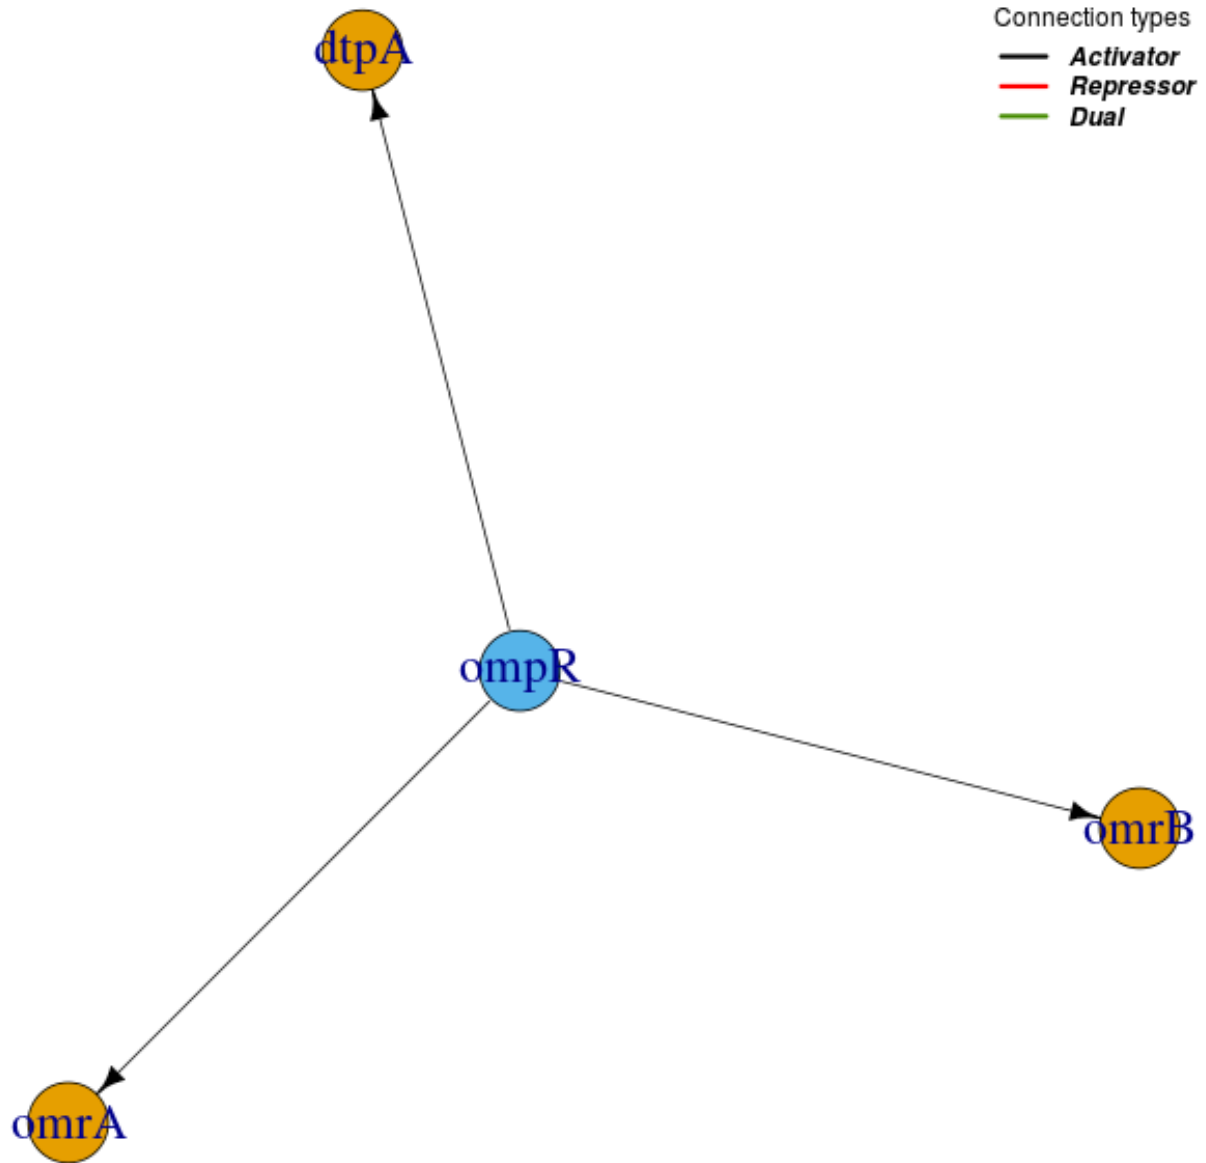

Id = 53

$|n = 0, \ell = 1\rangle$

**ecpR**

Connection types

— **Activator**

— **Repressor**

— **Dual**

**matA**

**ecpA**

Id = 54

$|n = 0, \ell = 1\rangle$

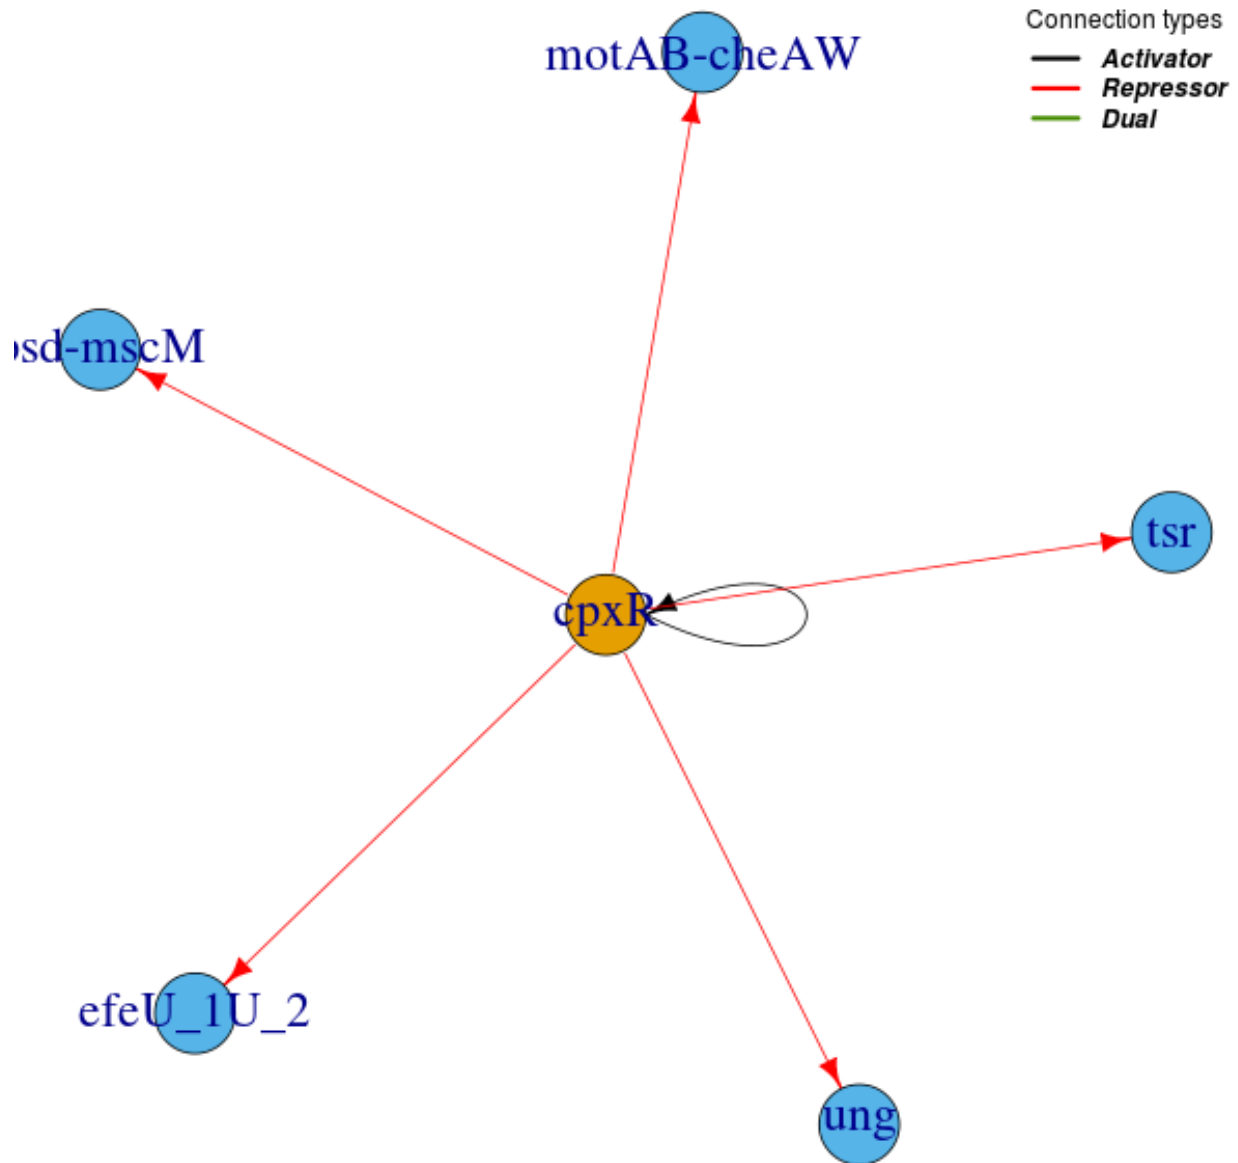

Id = 55

$|n = 0, \ell = 2\rangle$

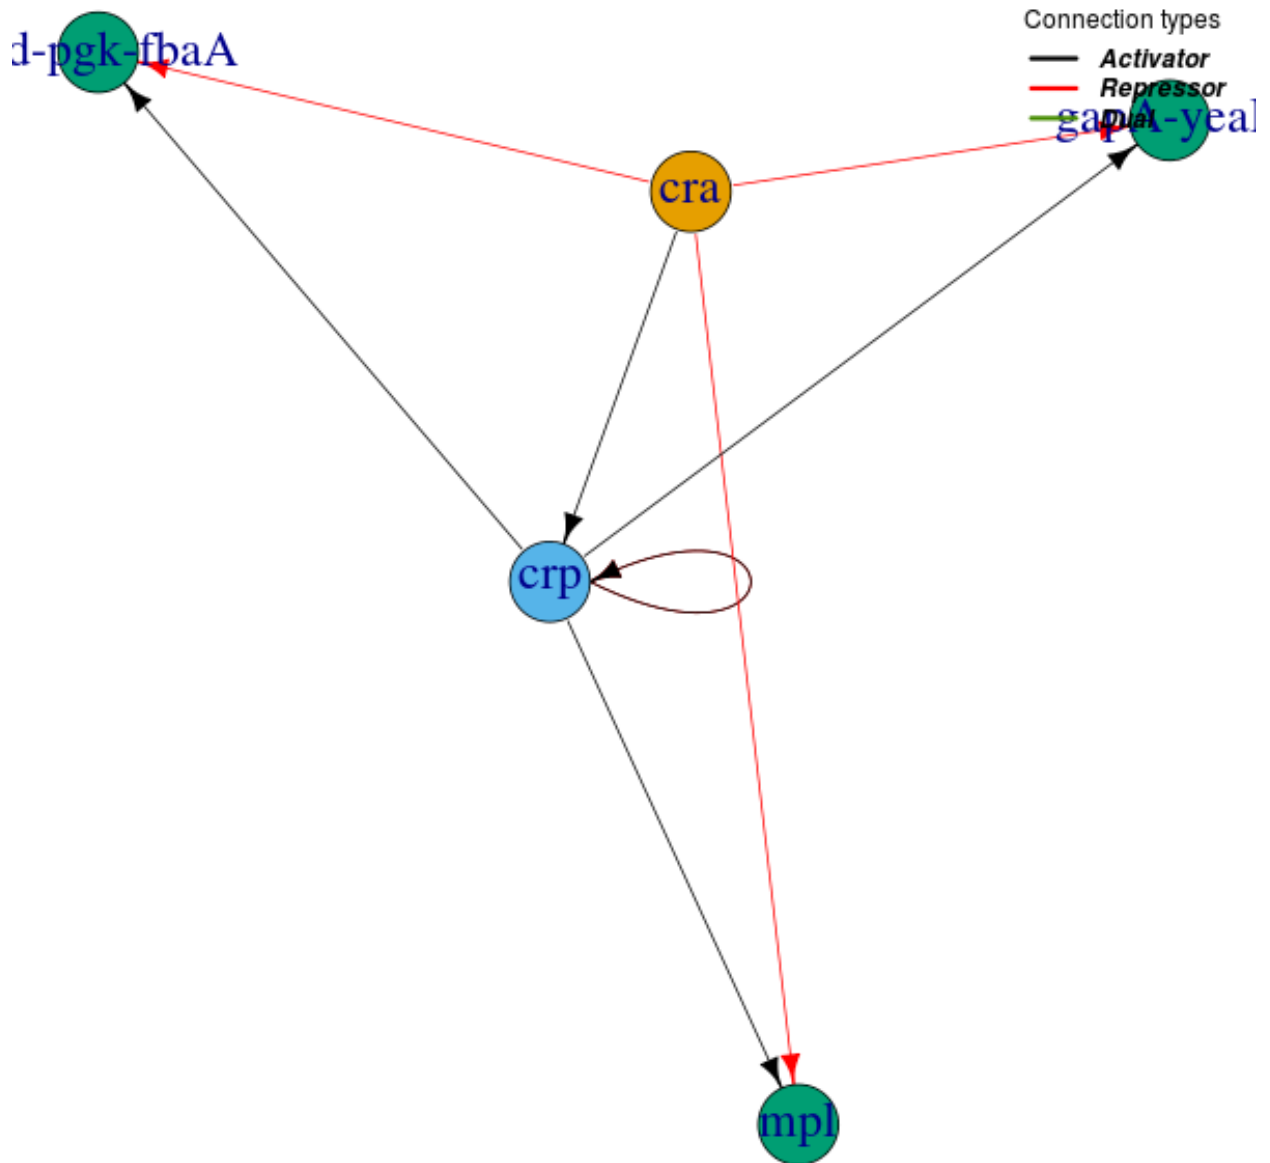

Id = 56

$|n = 1, \ell = 0\rangle$

rhlAB

Connection types

— *Activator*

— *Repressor*

— *Dual*

iscR

erpA



Id = 57

$|\varphi_d = 1.3802\dots, \ell = 1\rangle$

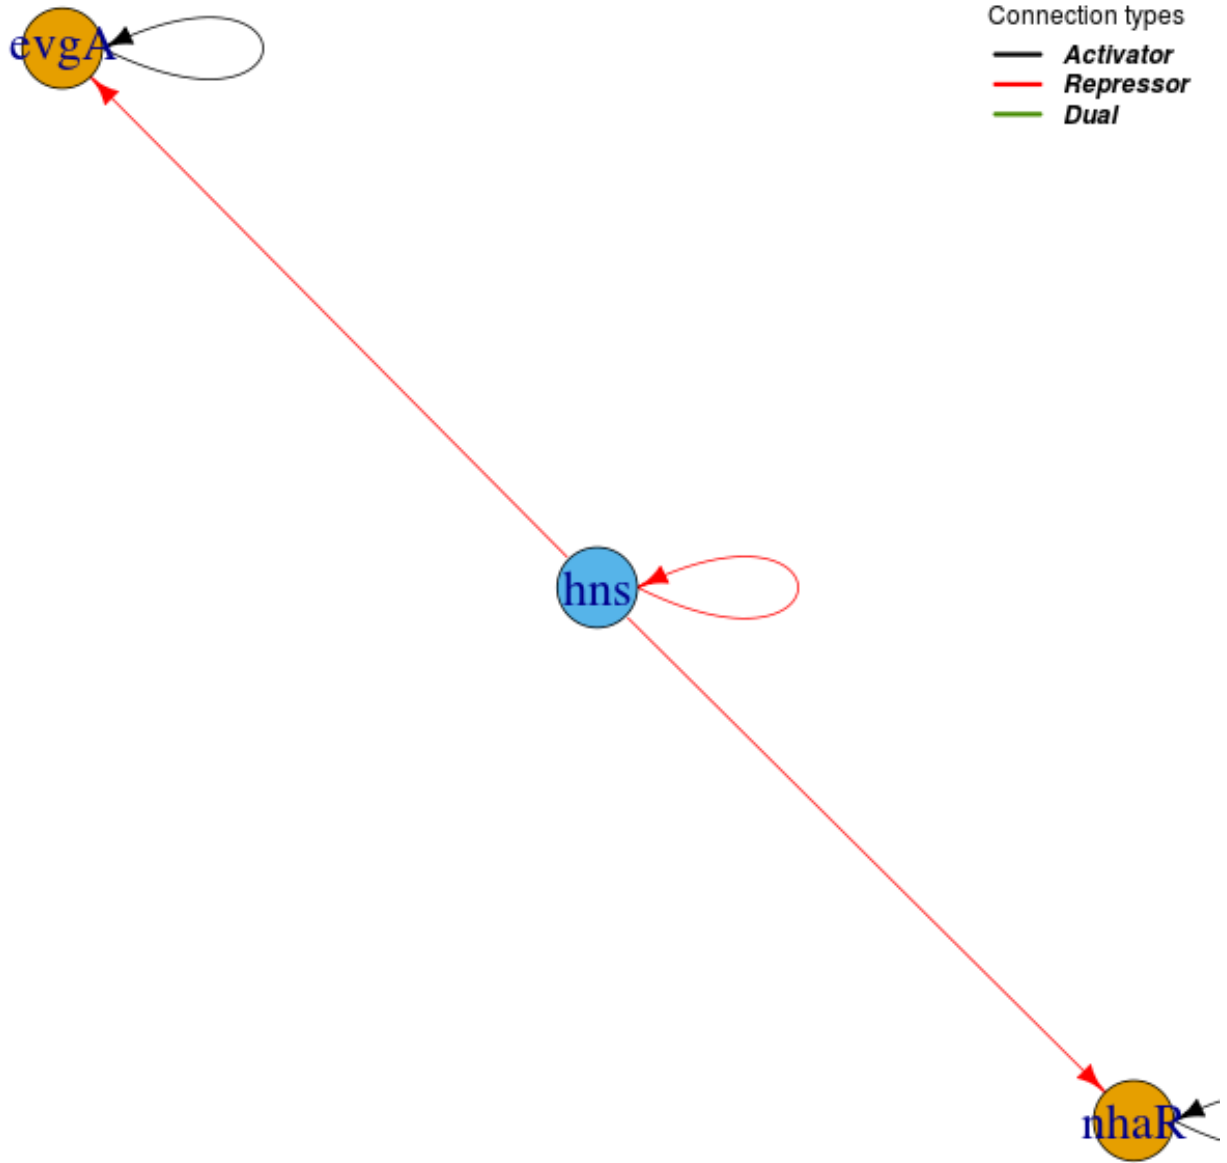

Id = 58

$|n = 0, \ell = 2\rangle$

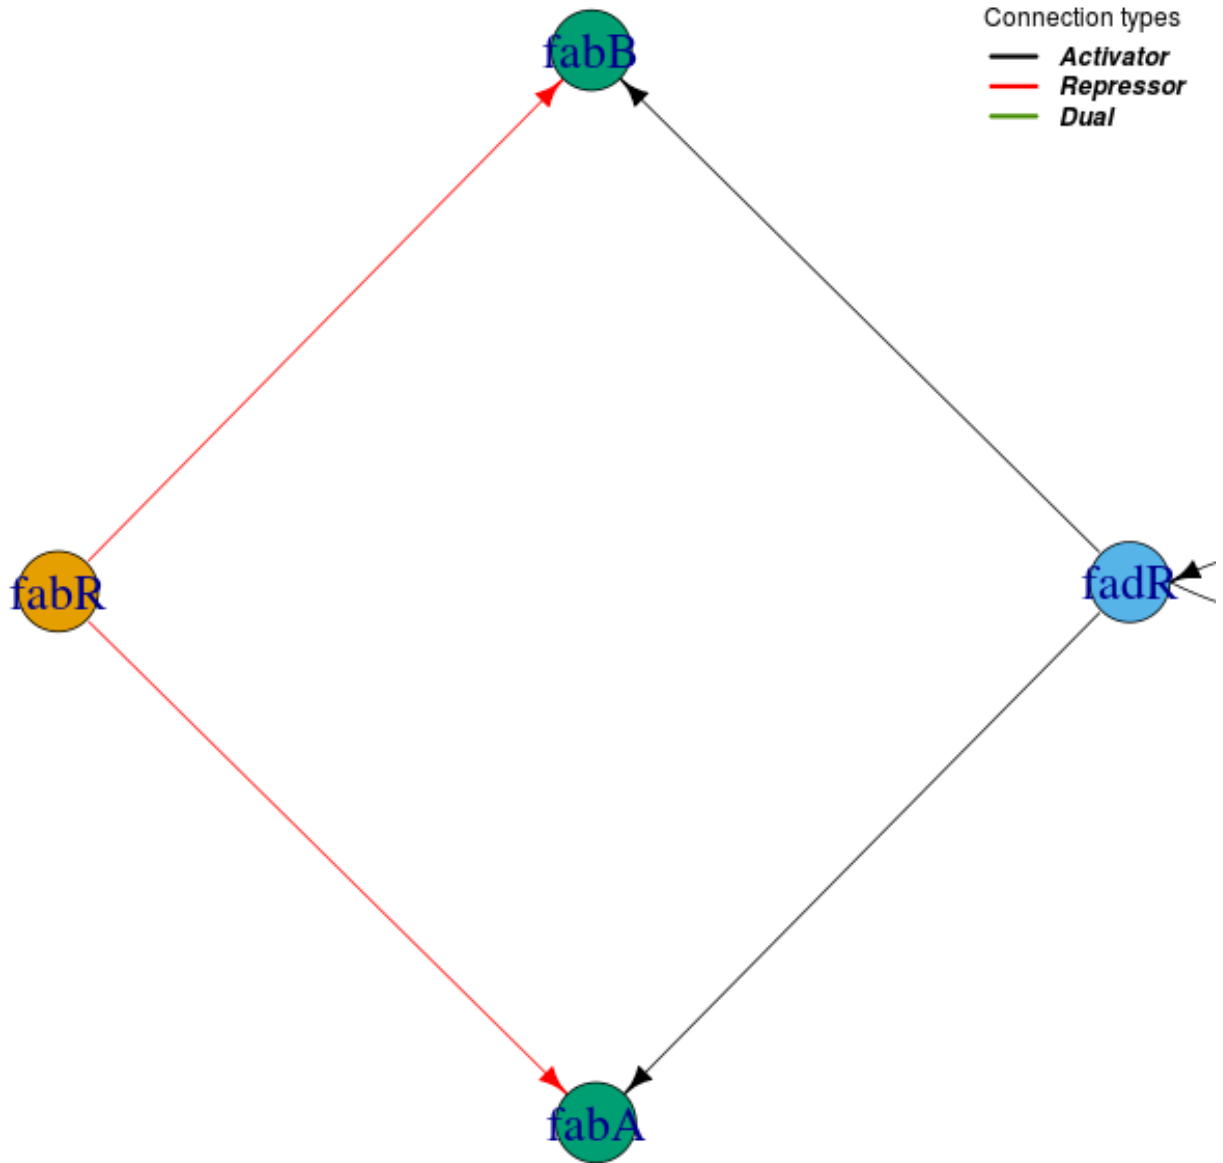

Id = 59

$|n = 0, \ell = 2\rangle$

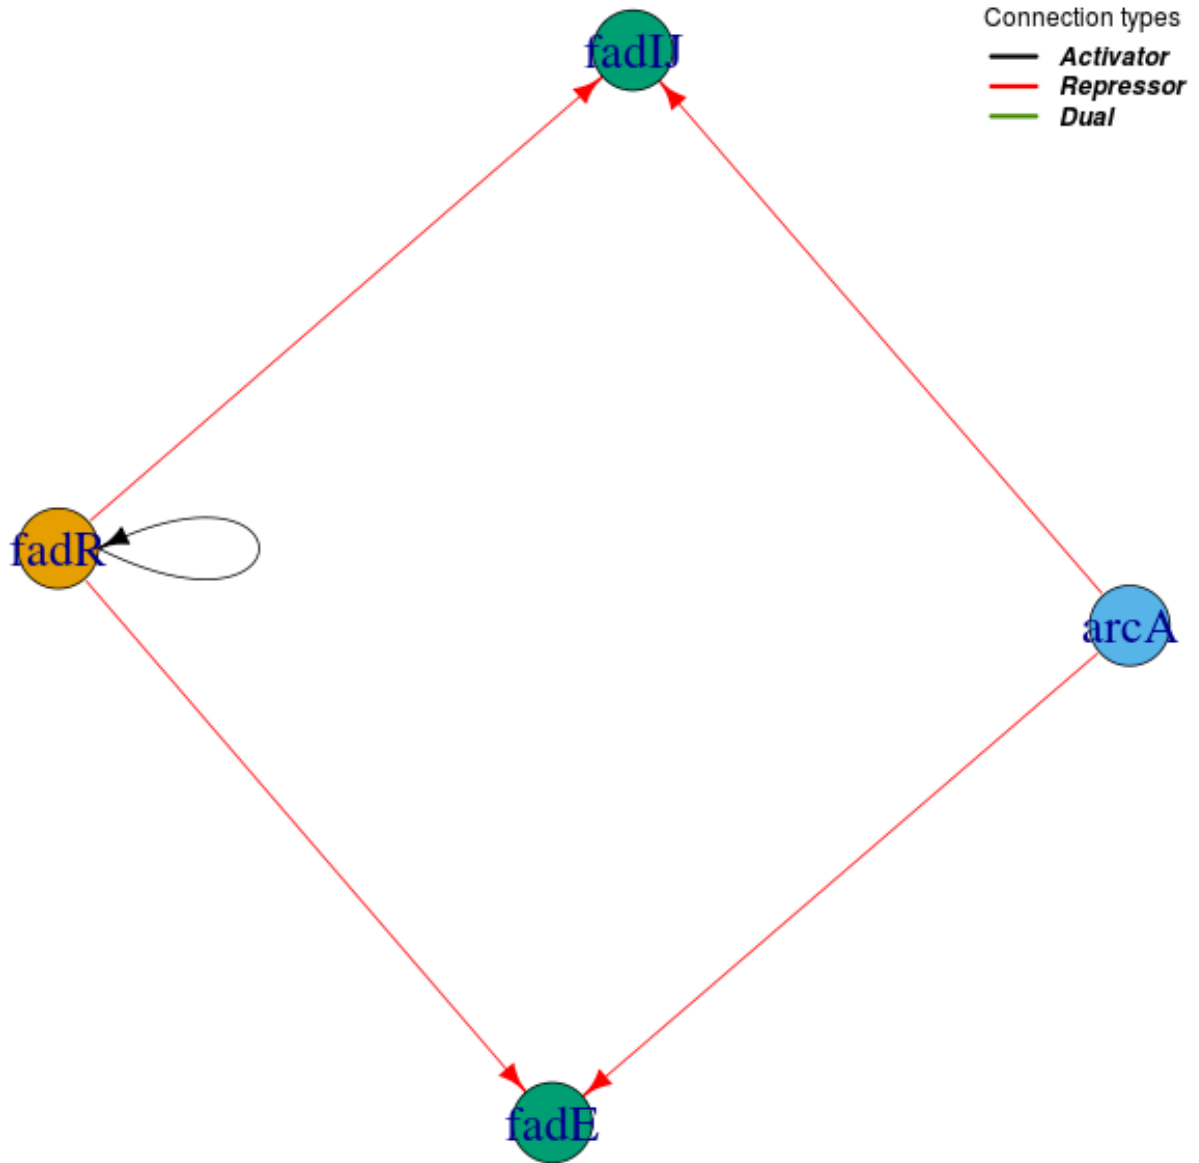

Id = 60

$|n = 0, \ell = 1\rangle$

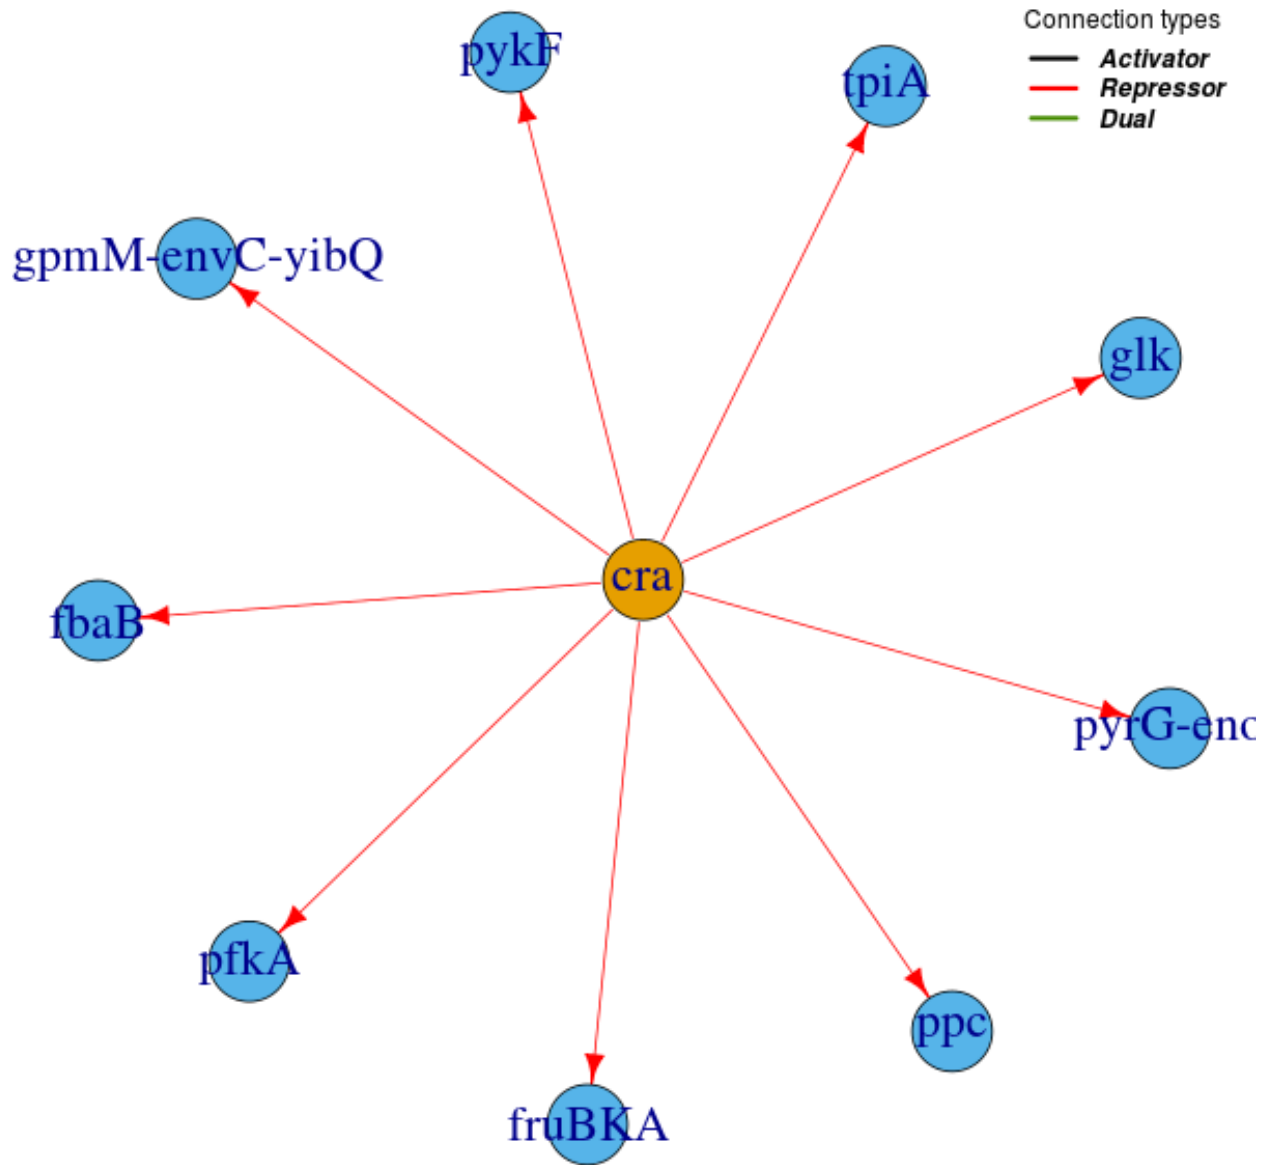

Id = 61

$|n = 0, \ell = 1\rangle$

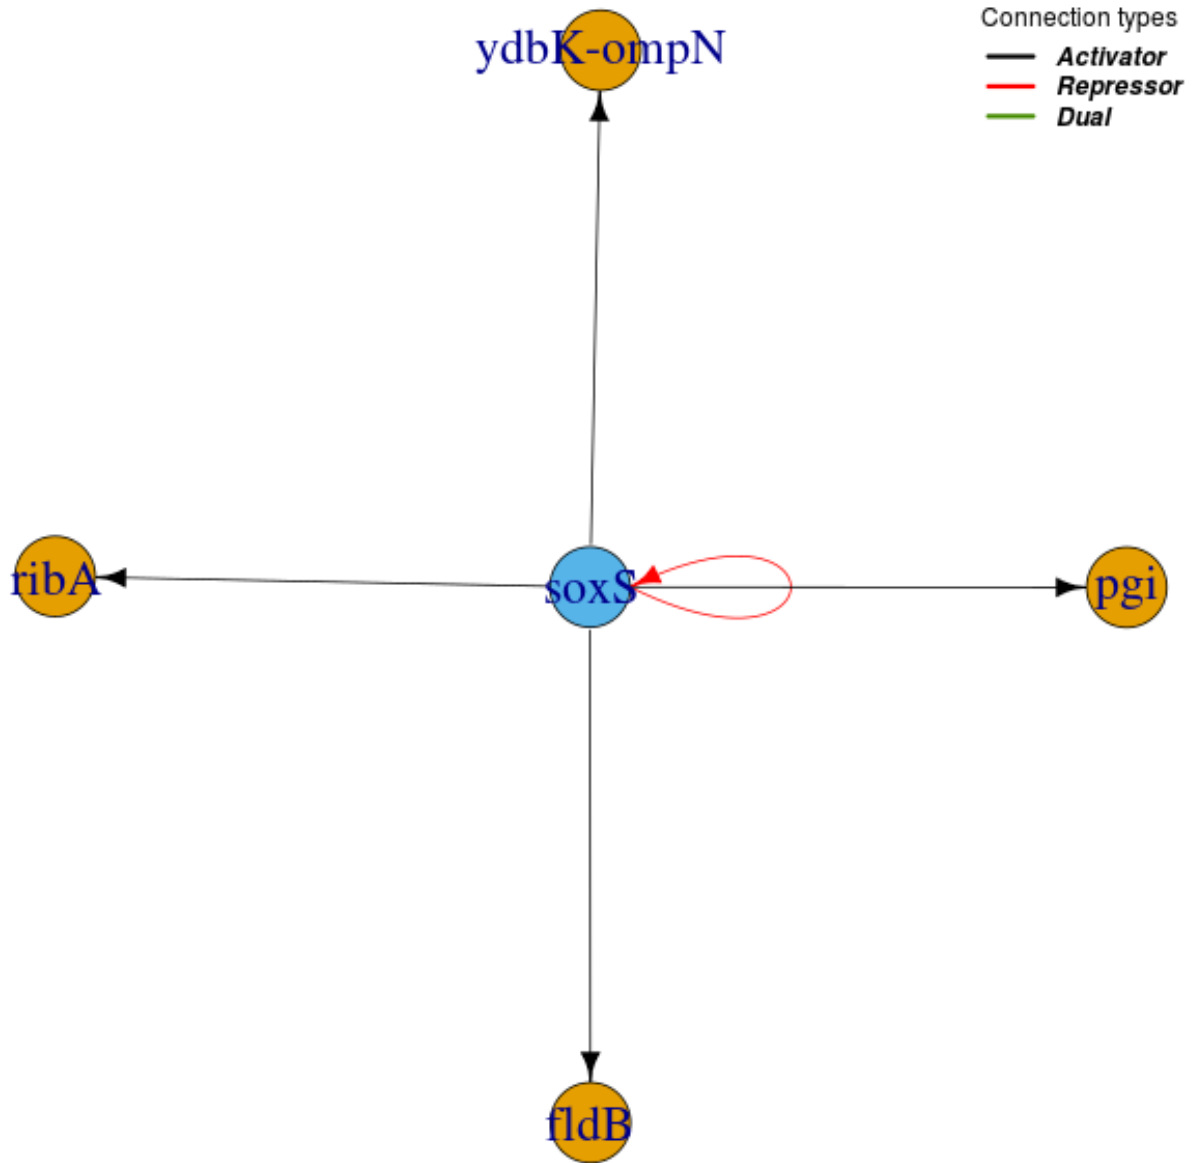

Id = 62

$|n = 0, \ell = 1\rangle$

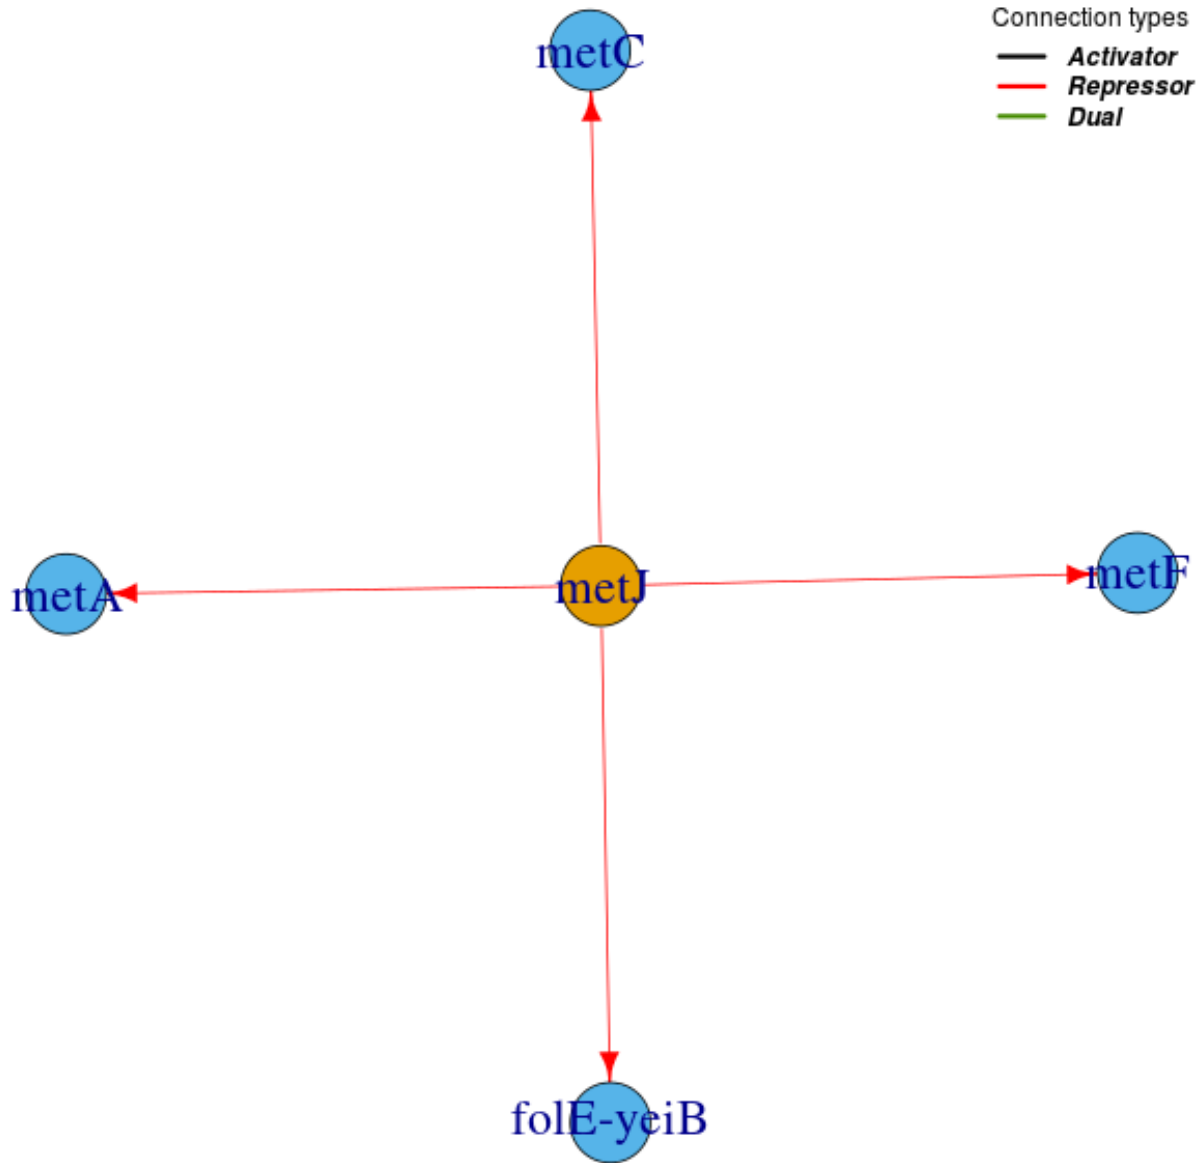

Id = 63

$|n = 0, \ell = 2\rangle$

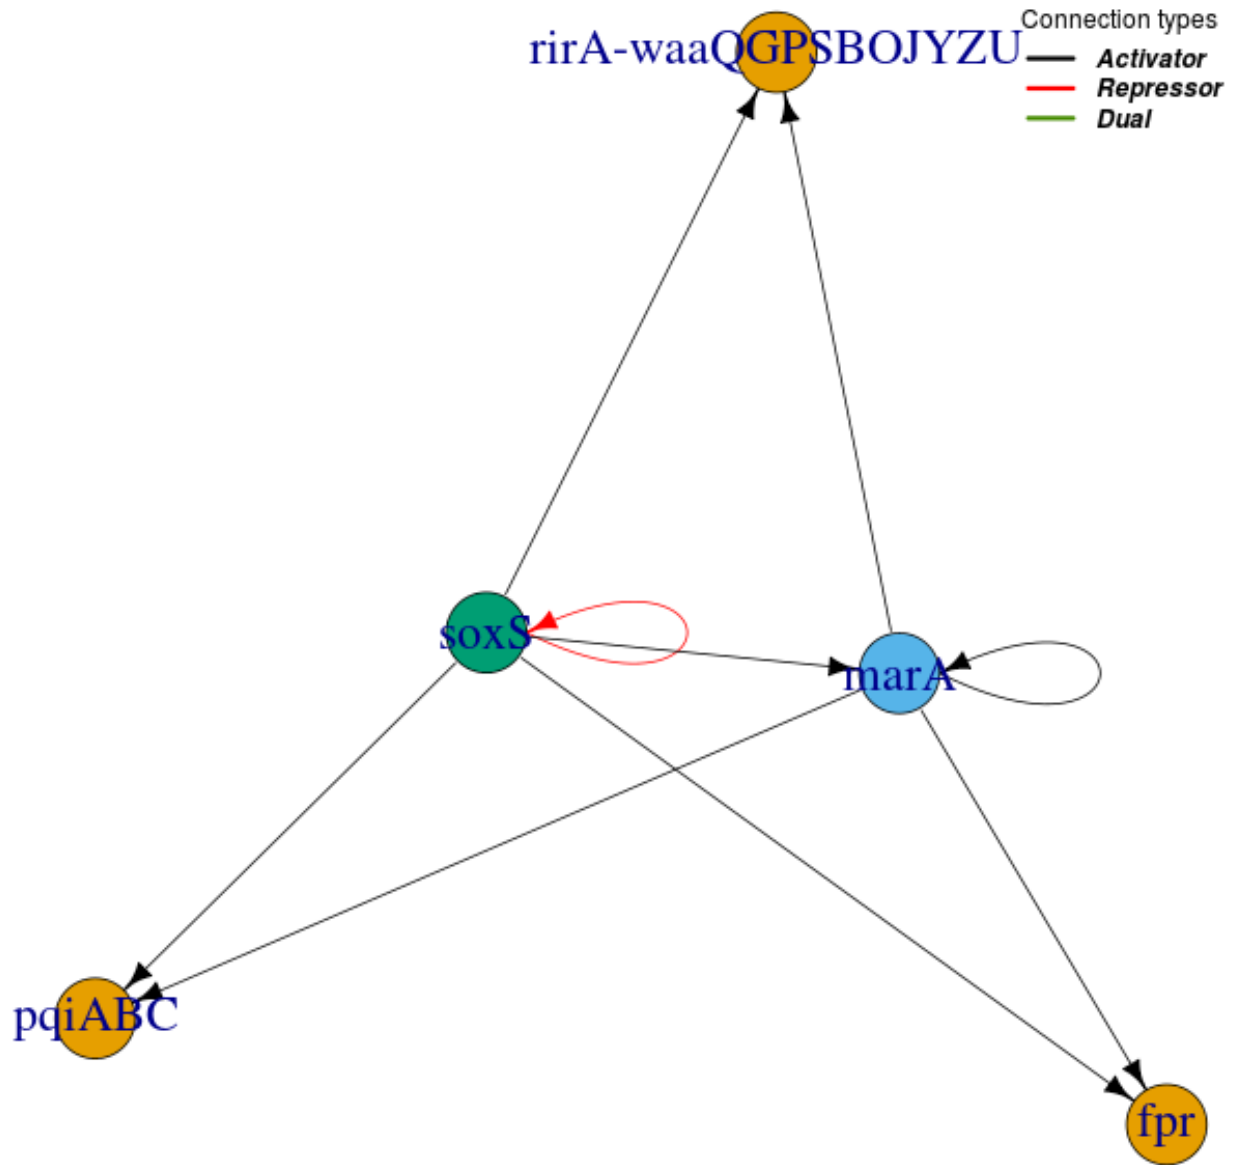

Id = 64

$|n = 1, \ell = 1\rangle$

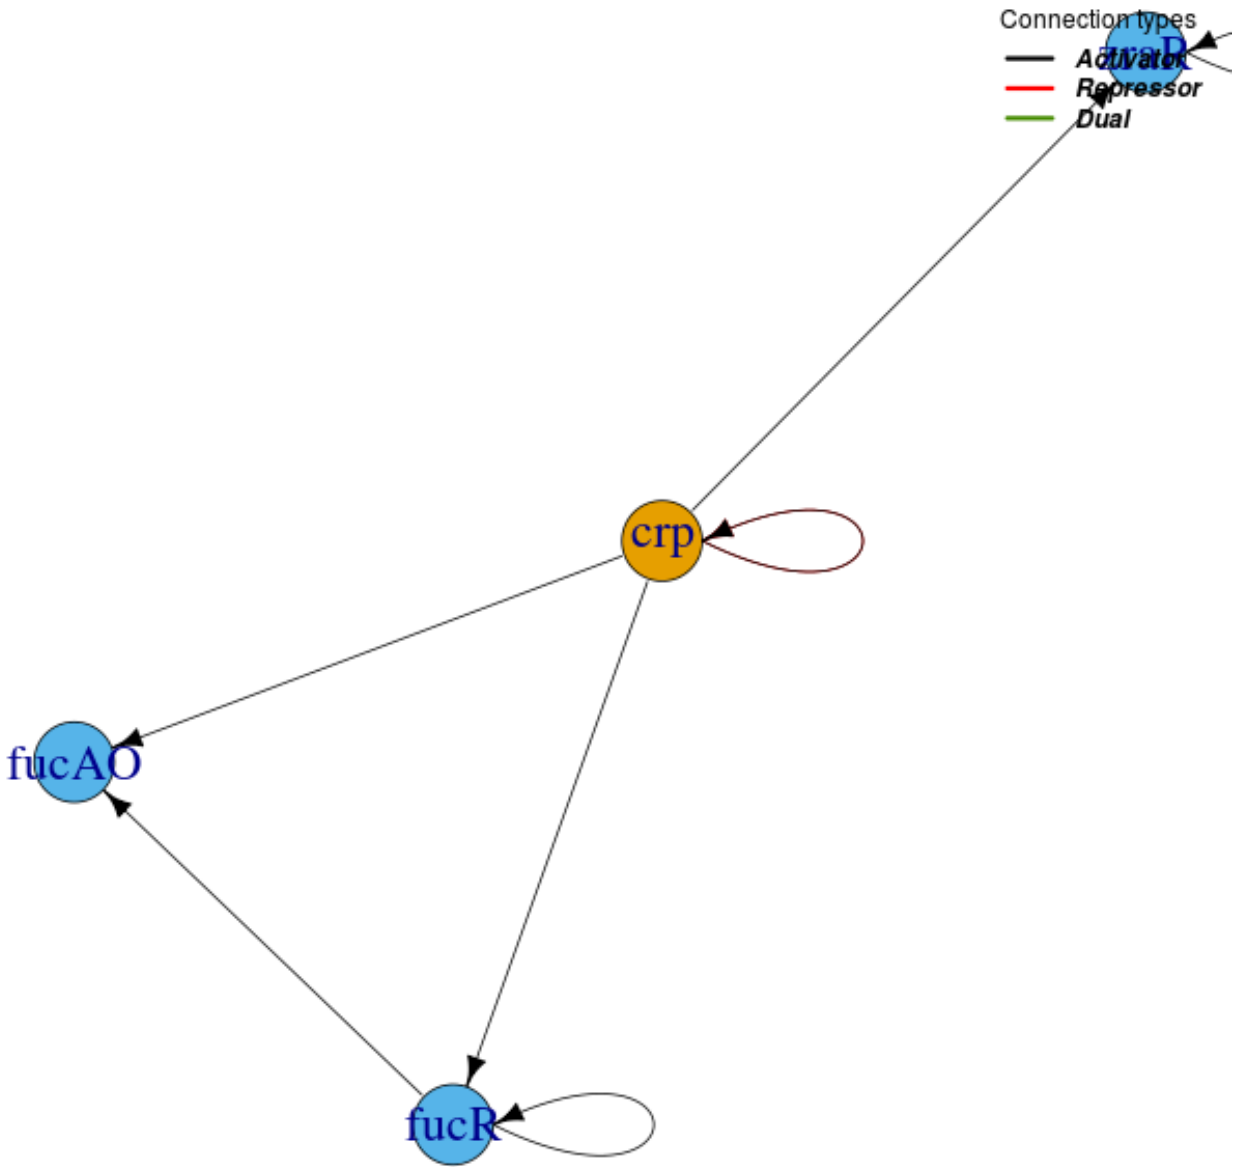



Id = 65

$|n = 0, \ell = 1\rangle$

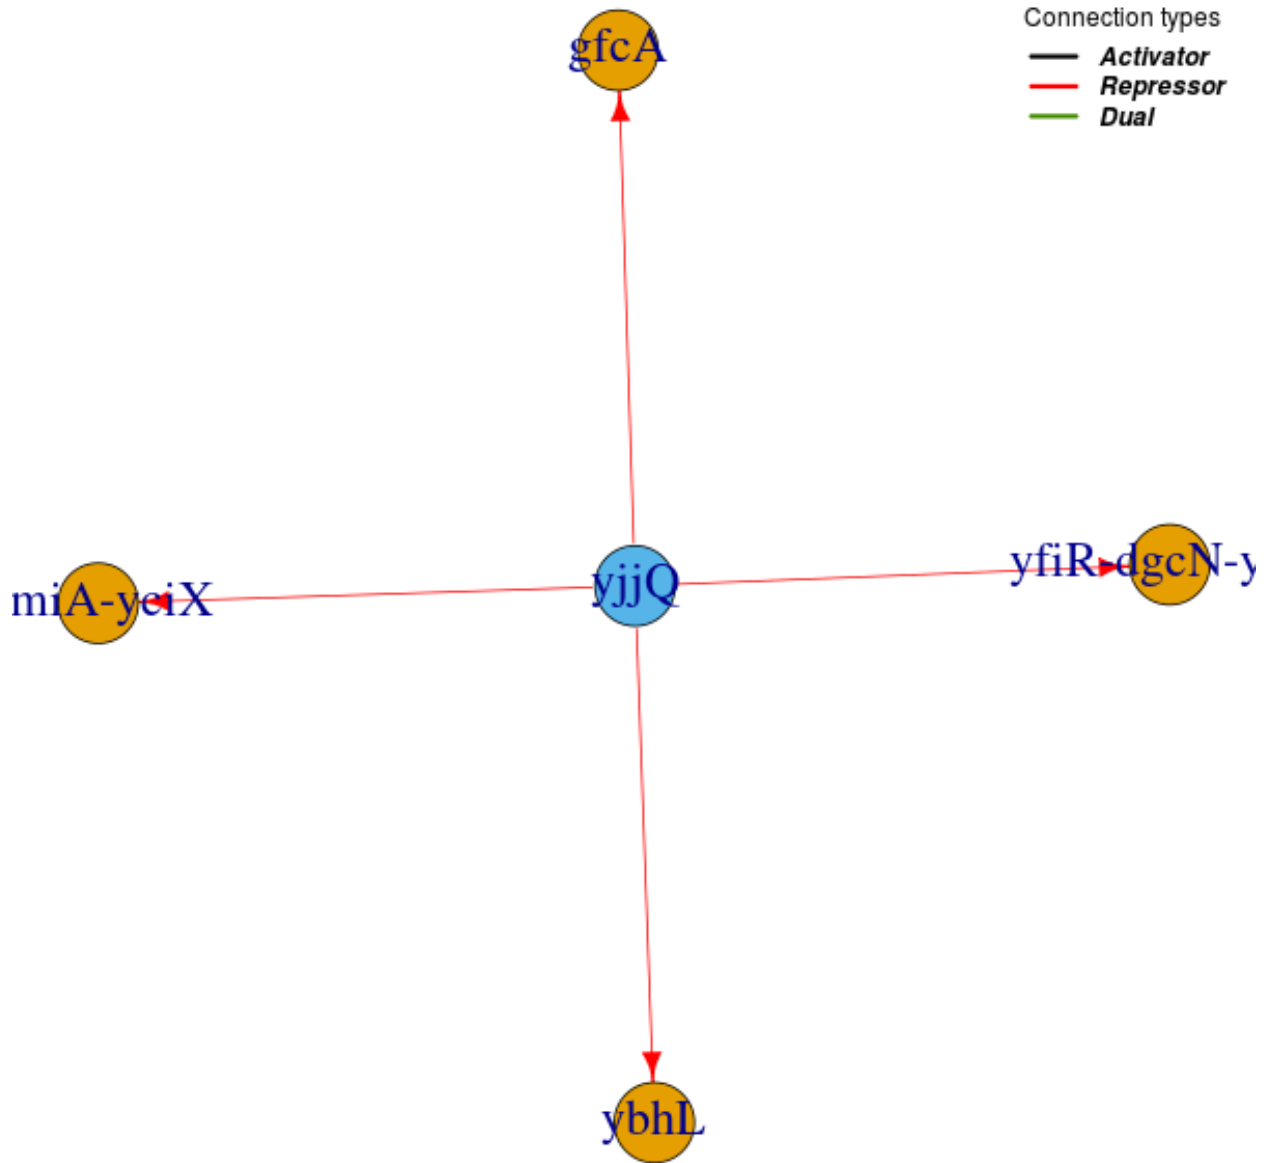

Id = 66

$|n = 0, \ell = 2\rangle$

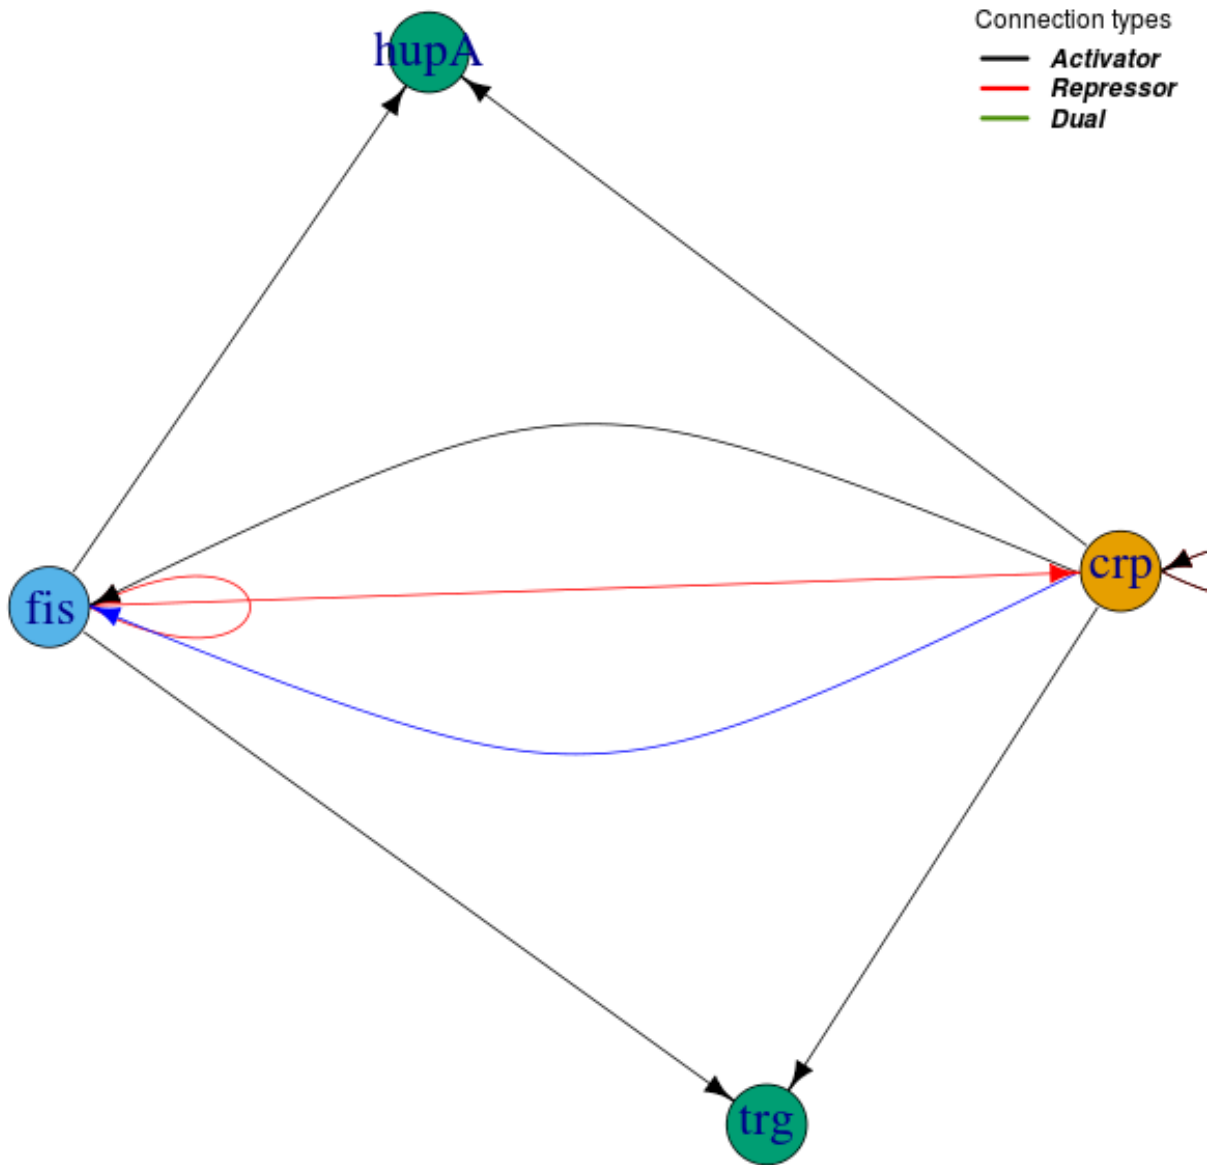

Id = 67

$|n = 0, \ell = 1\rangle$

**mA-yhbE-obgE**

Connection types

- **Activator**
- **Repressor**
- **Dual**

**mlrA**

**ibaG-mur.**

Id = 68

$|n = 0, \ell = 1\rangle$

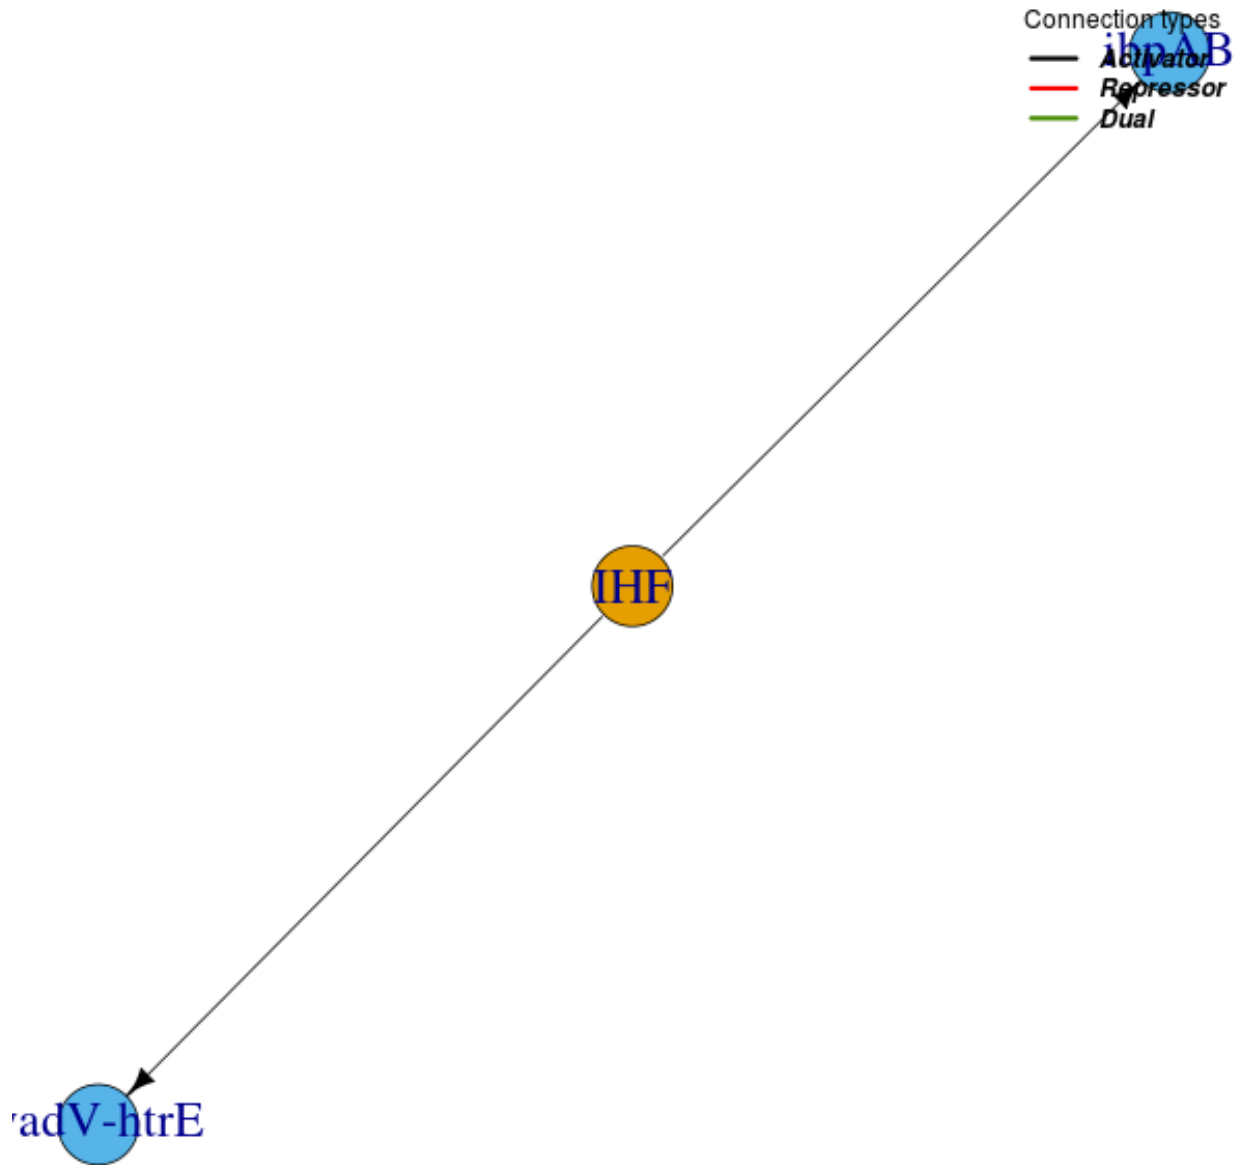

Id = 69

$|n = 1, \ell = 2\rangle$

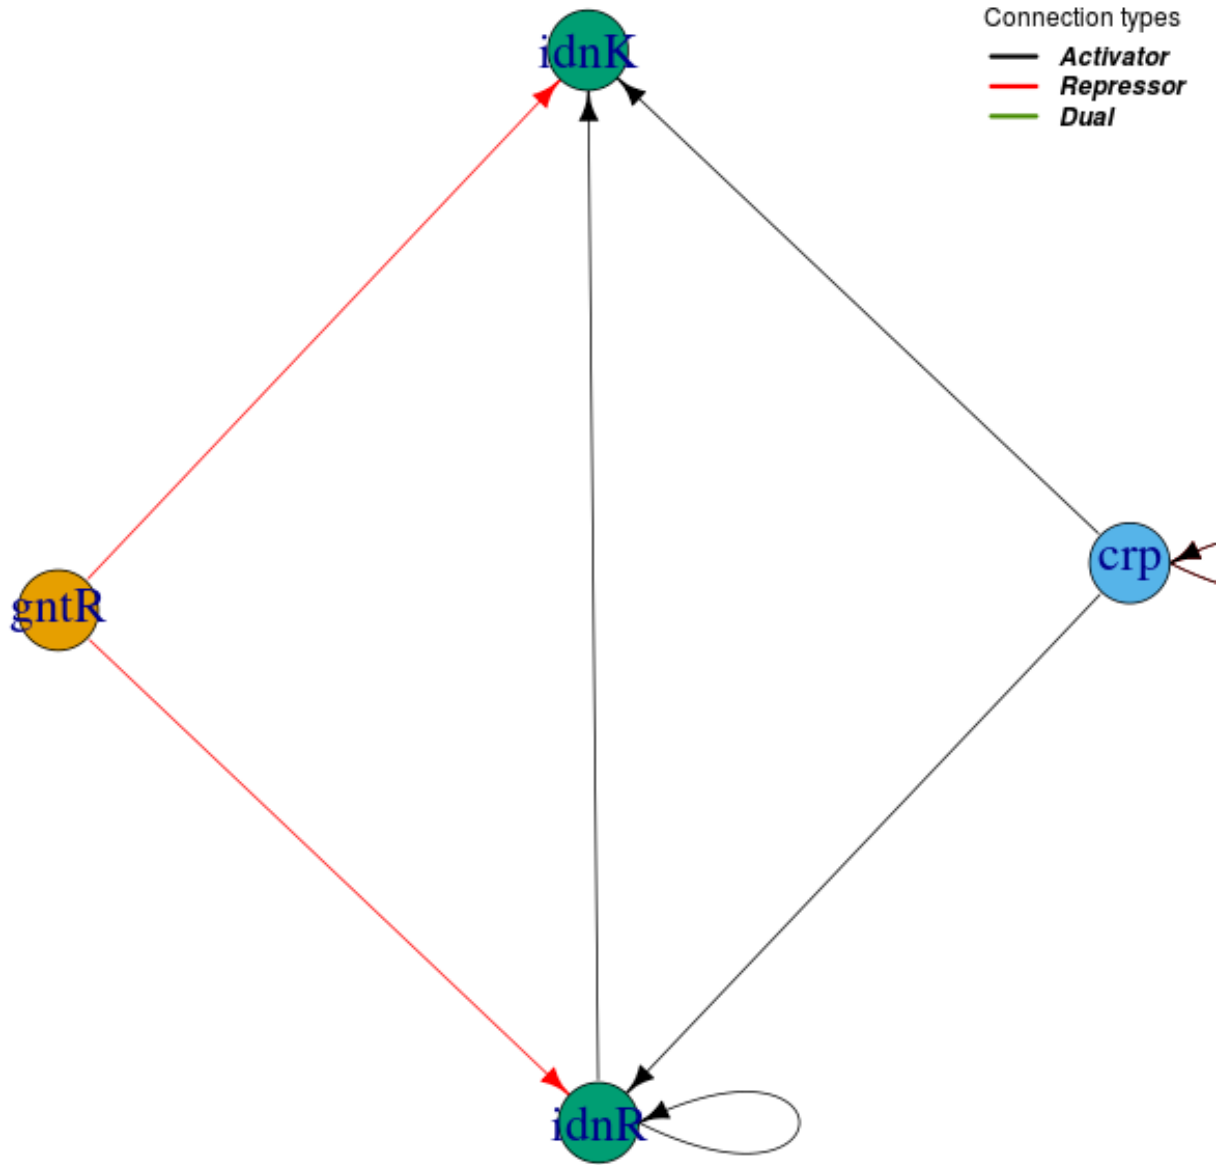

Id = 70

$|n = 0, \ell = 1\rangle$

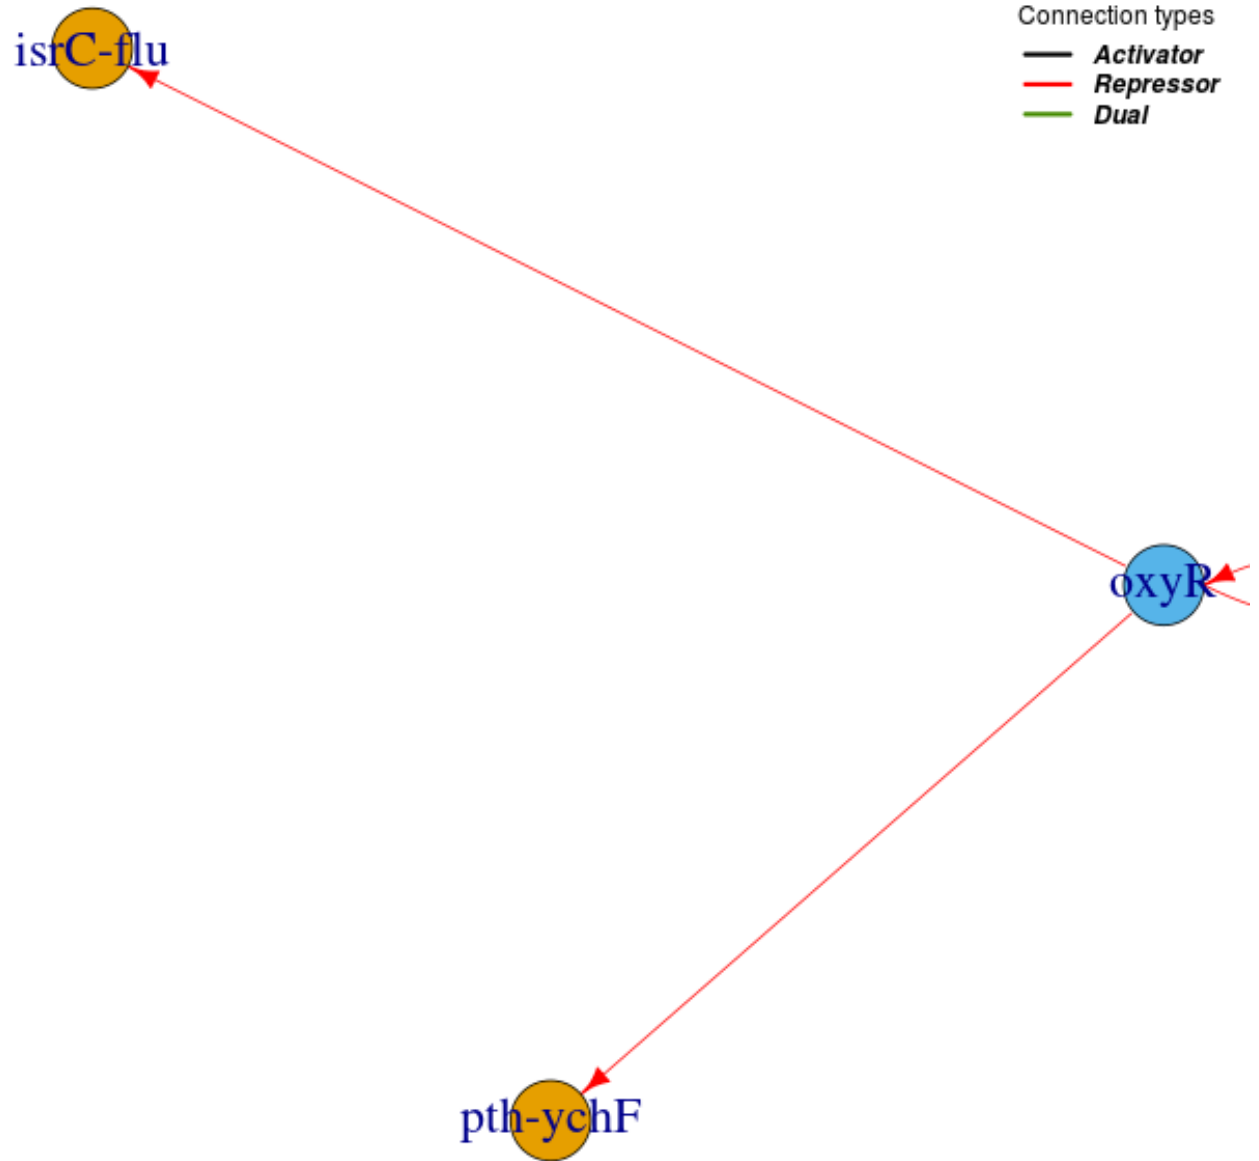

Id = 71

$|\varphi_d = 1.6180\dots, \ell = 2\rangle$

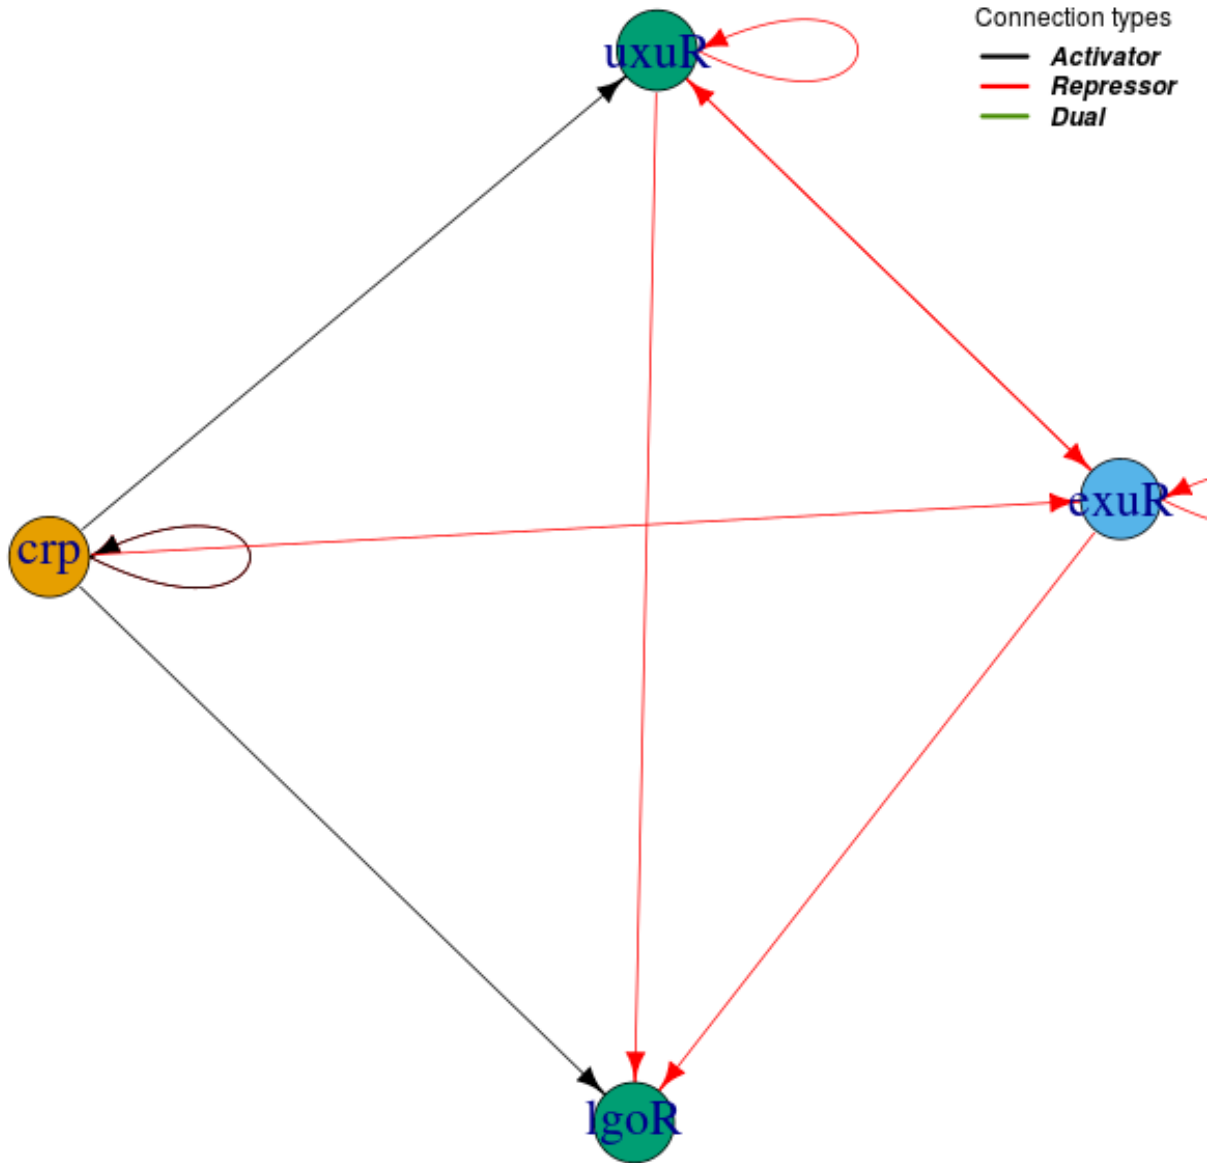

Id = 72

$|n = 0, \ell = 1\rangle$

osmB

Connection types

— *Activator*

— *Repressor*

— *Dual*

rcaB

lolA-rarA



Id = 73

$|n = 1, \ell = 1\rangle$

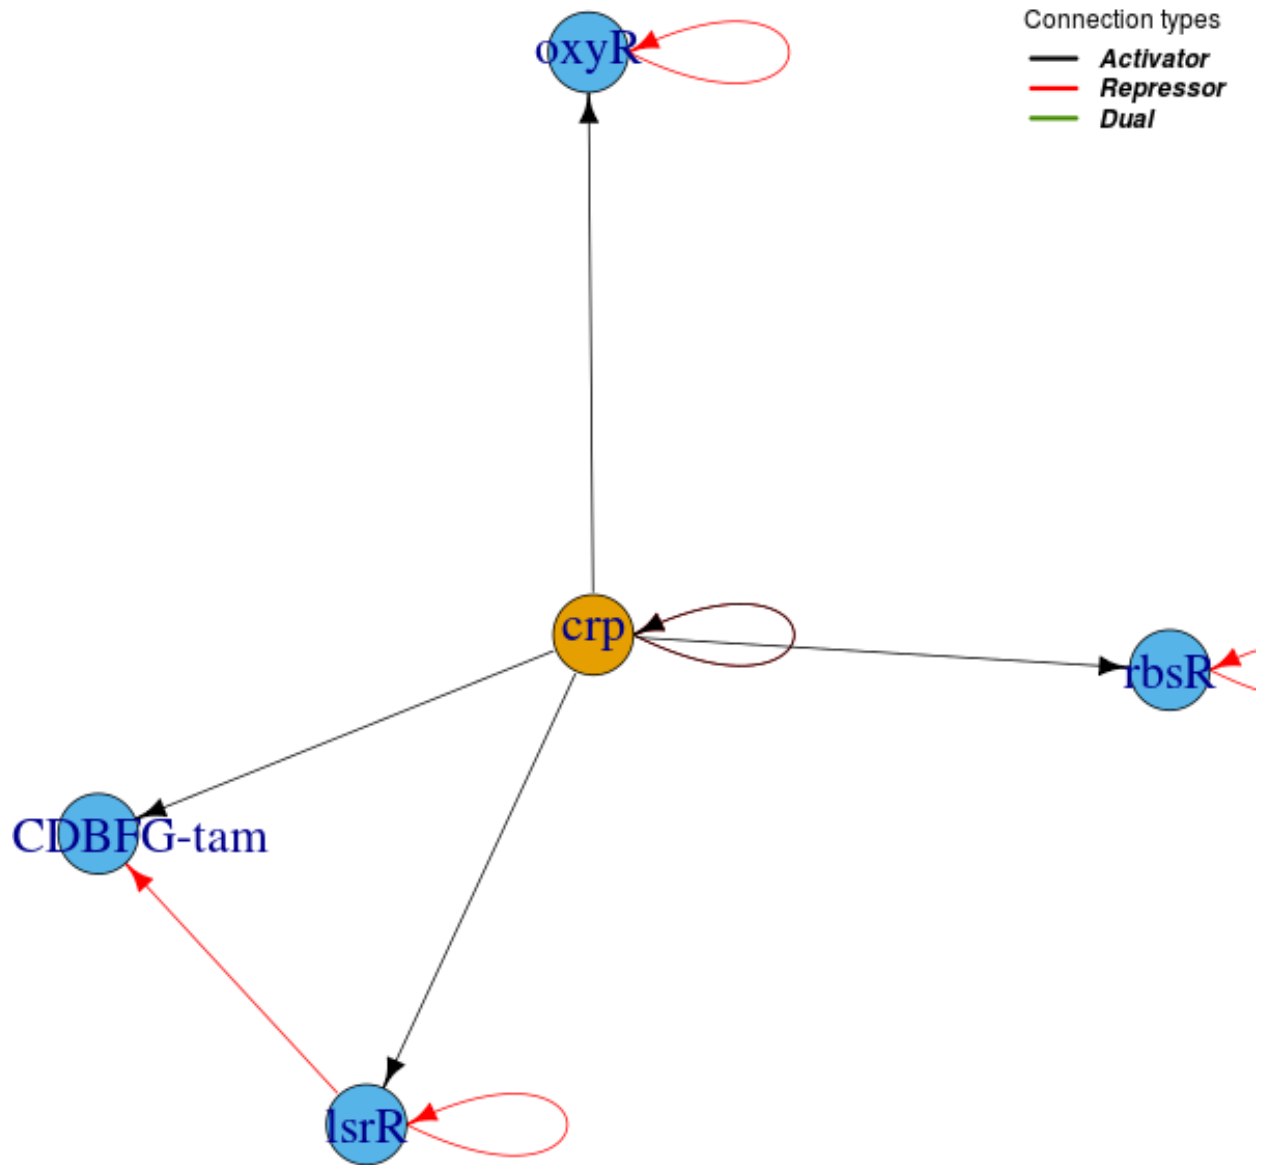

Id = 74

$|n = 1, \ell = 1\rangle$

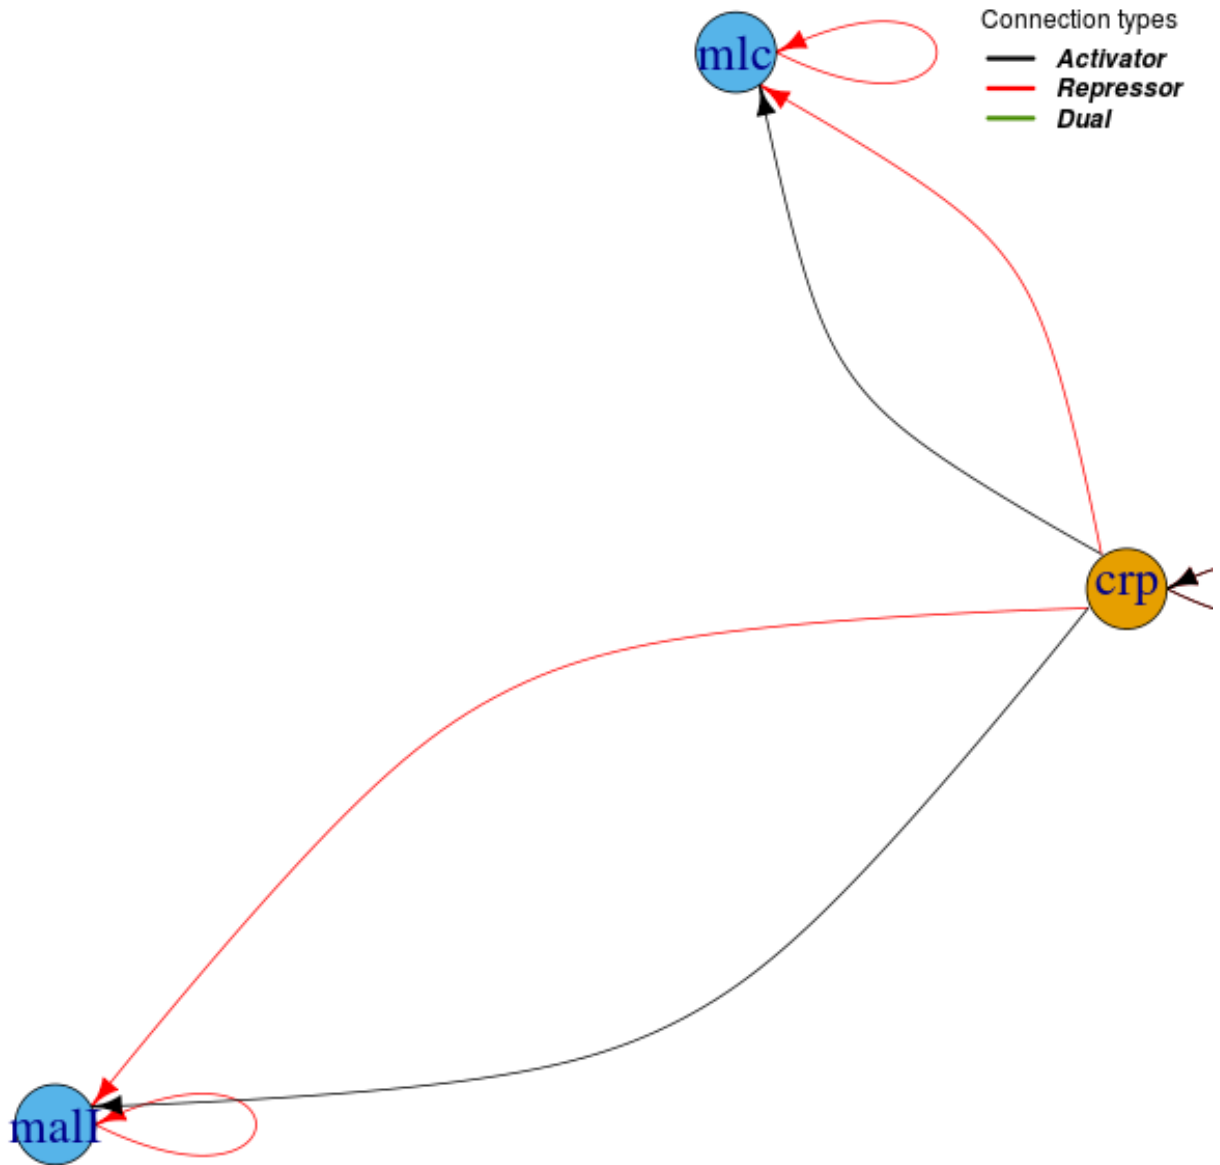

Id = 75

$|n = 0, \ell = 1\rangle$

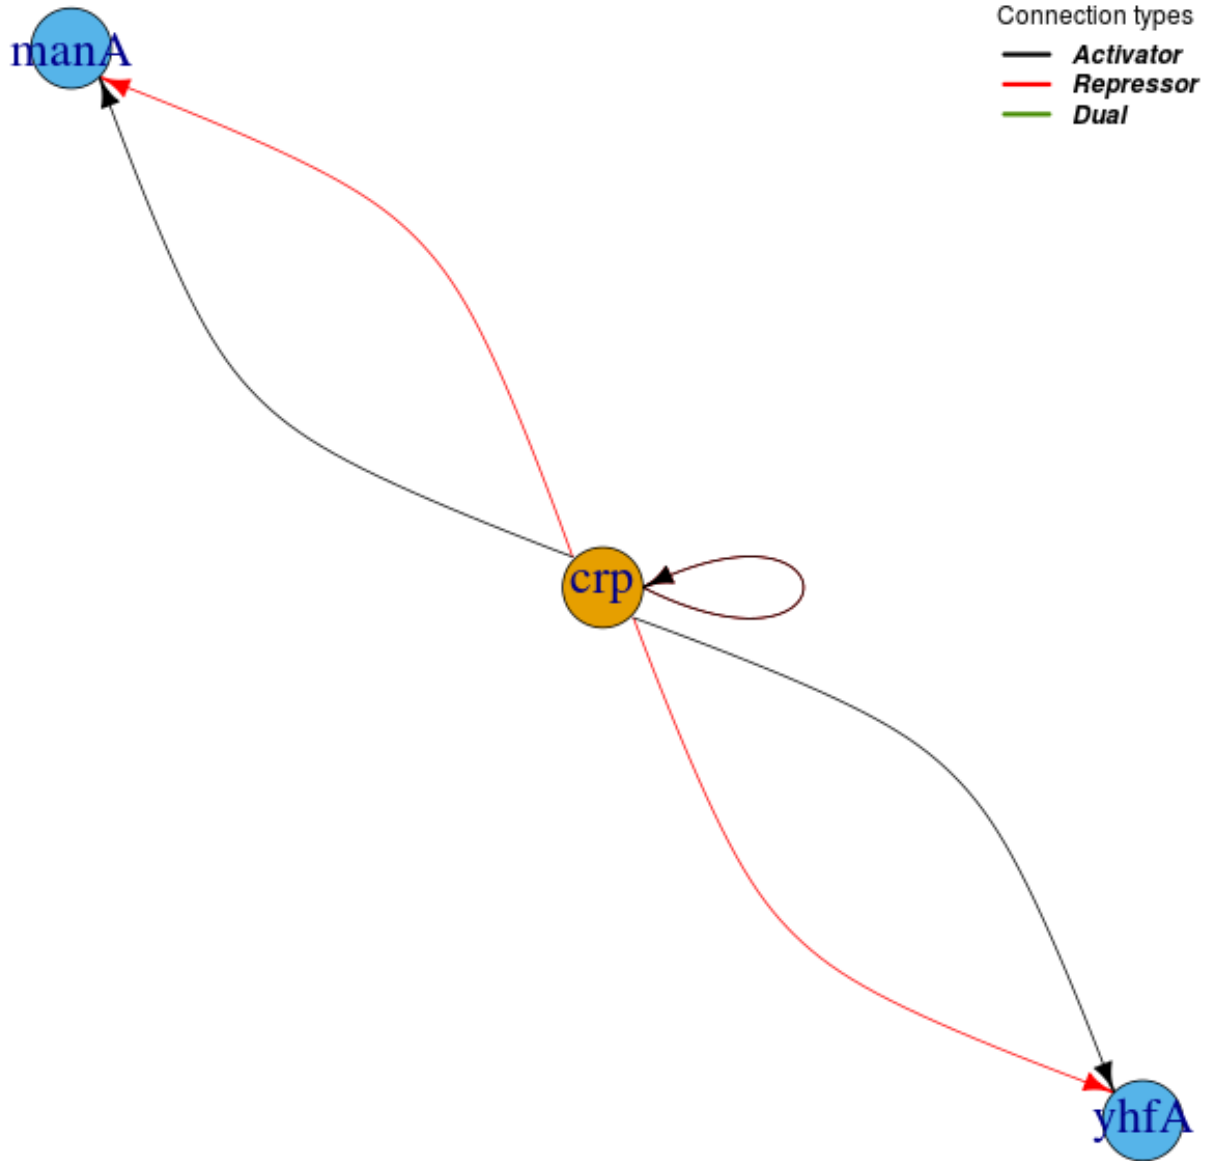

Id = 76

$|n = 1, \ell = 0\rangle$

mngAB

Connection types

- *Activator*
- *Repressor*
- *Dual*

mngR

Id = 77

$|n = 0, \ell = 1\rangle$

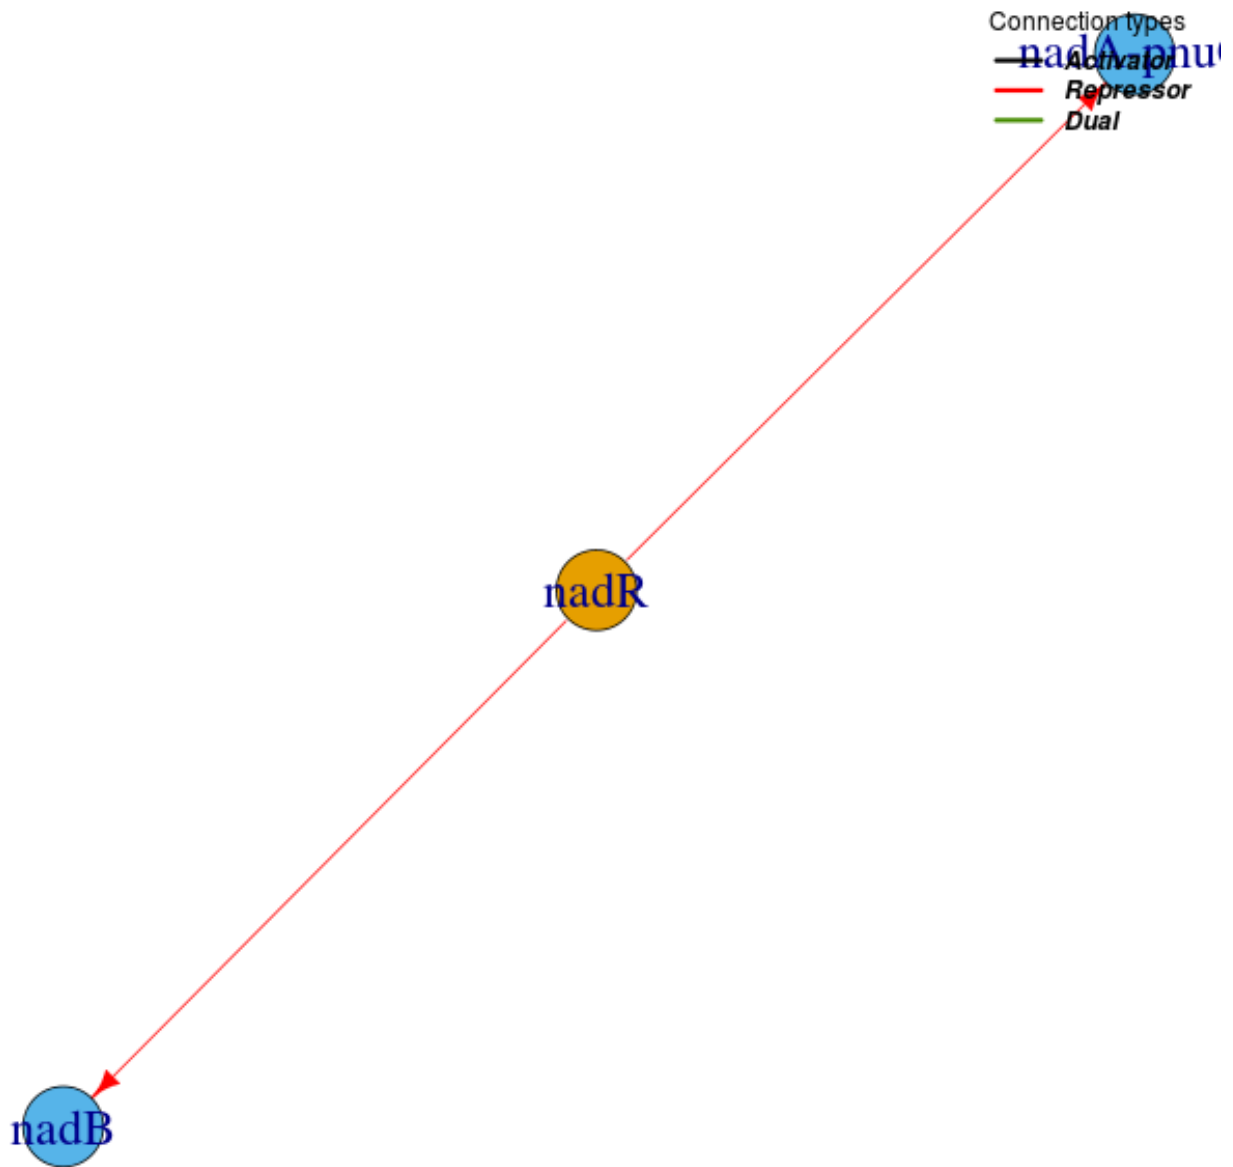

Id = 78

$|n = 1, \ell = 0\rangle$

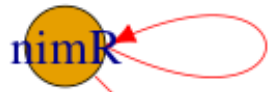

Connection types

-  **Activator**
-  **Repressor**
-  **Dual**

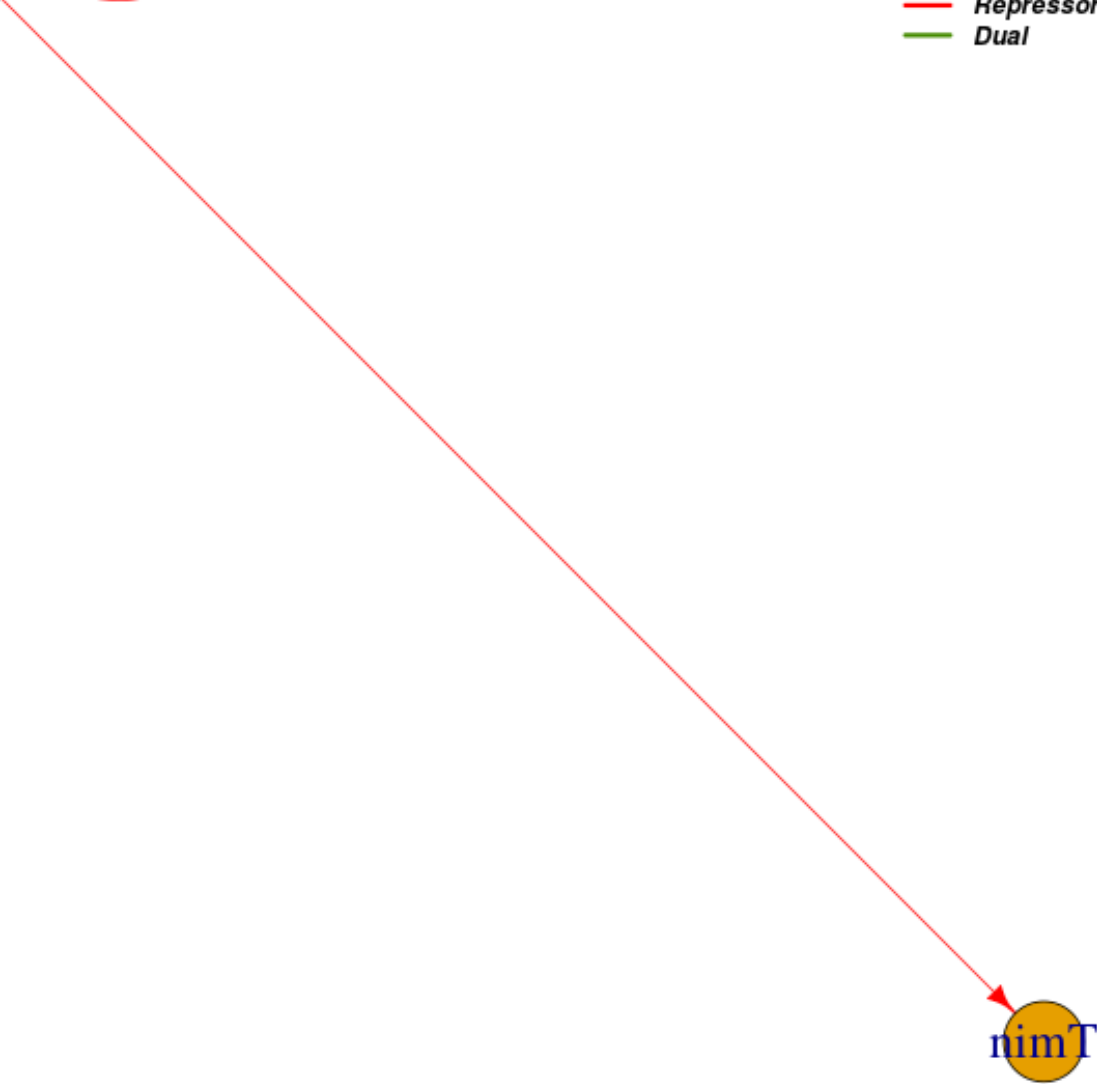

Id = 79

$|n = 0, \ell = 1\rangle$

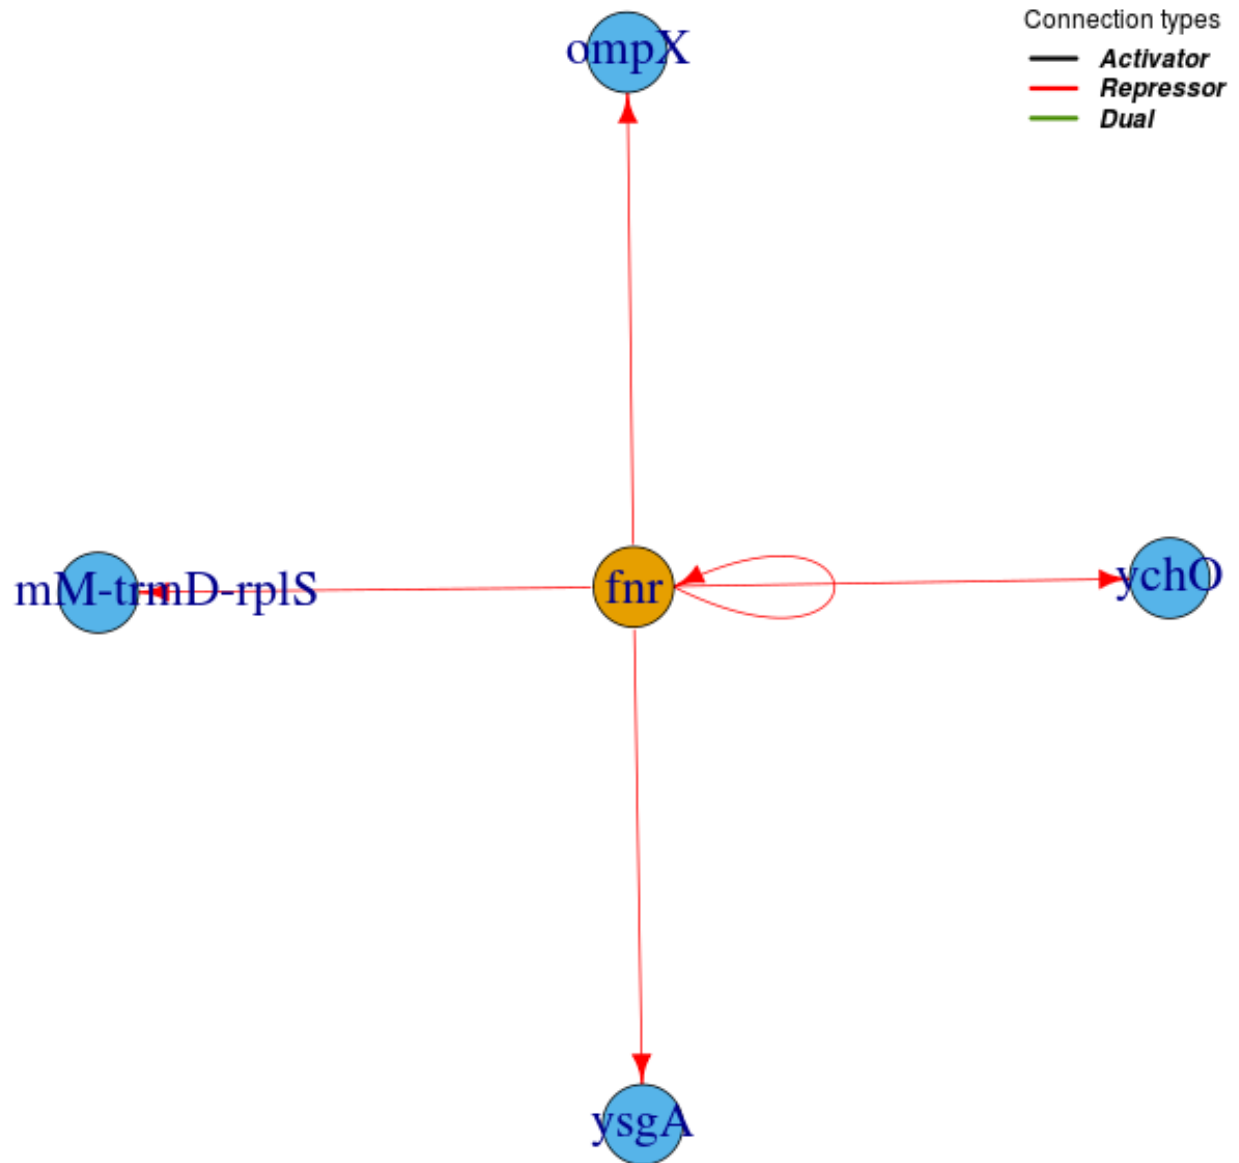

Id = 80

$|n = 0, \ell = 1\rangle$

pepD

Connection types

— *Activator*

— *Repressor*

— *Dual*

csgD

yhbTS

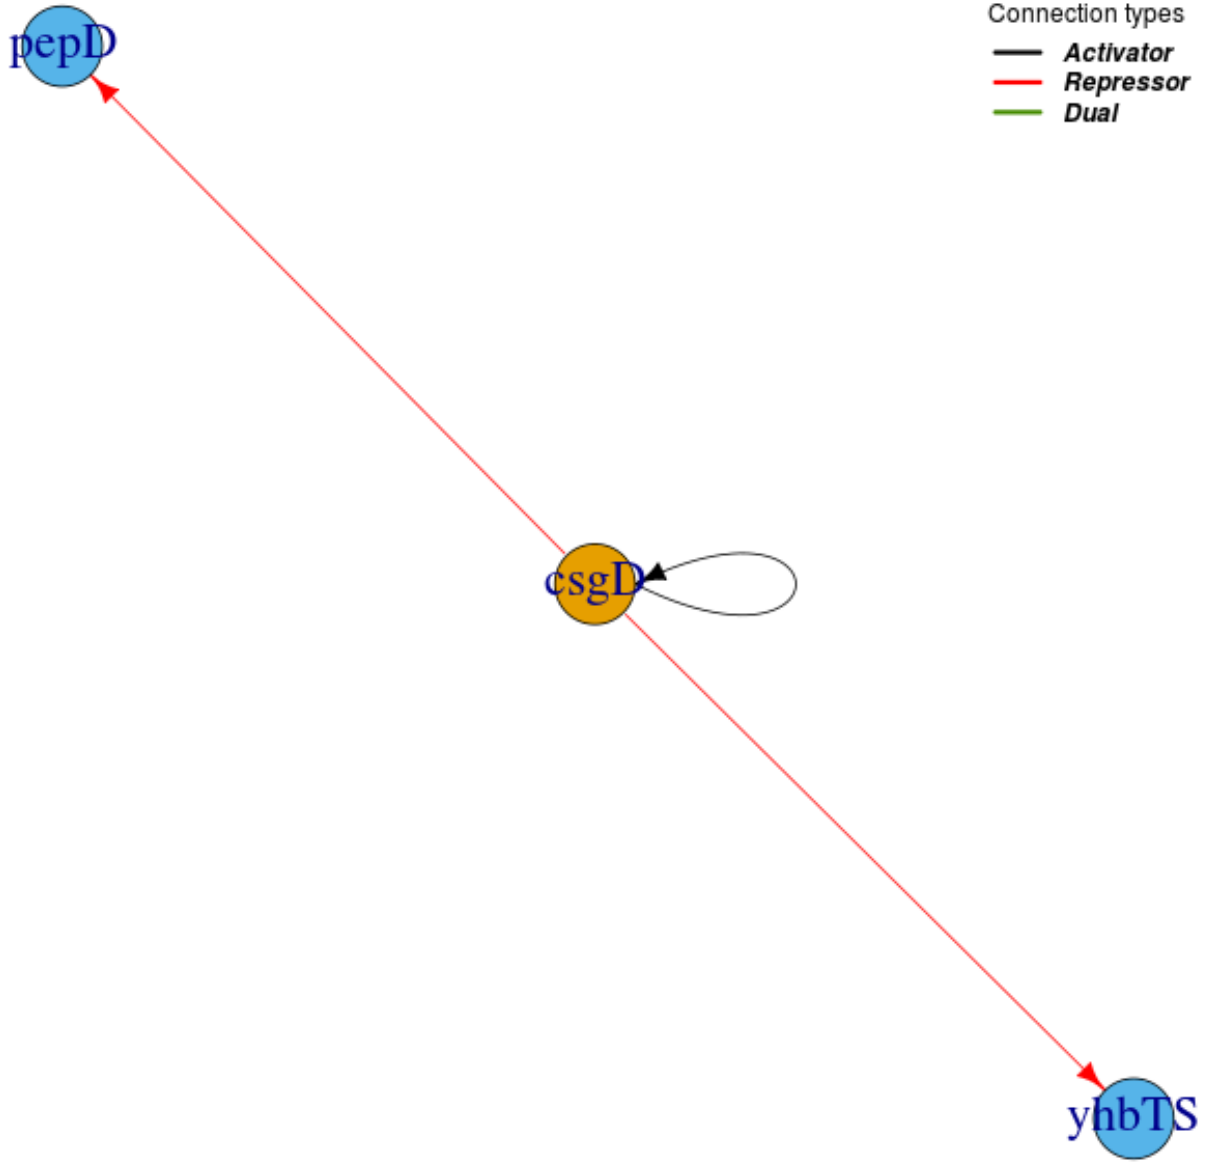



Id = 81

$|n = 2, \ell = 0\rangle$

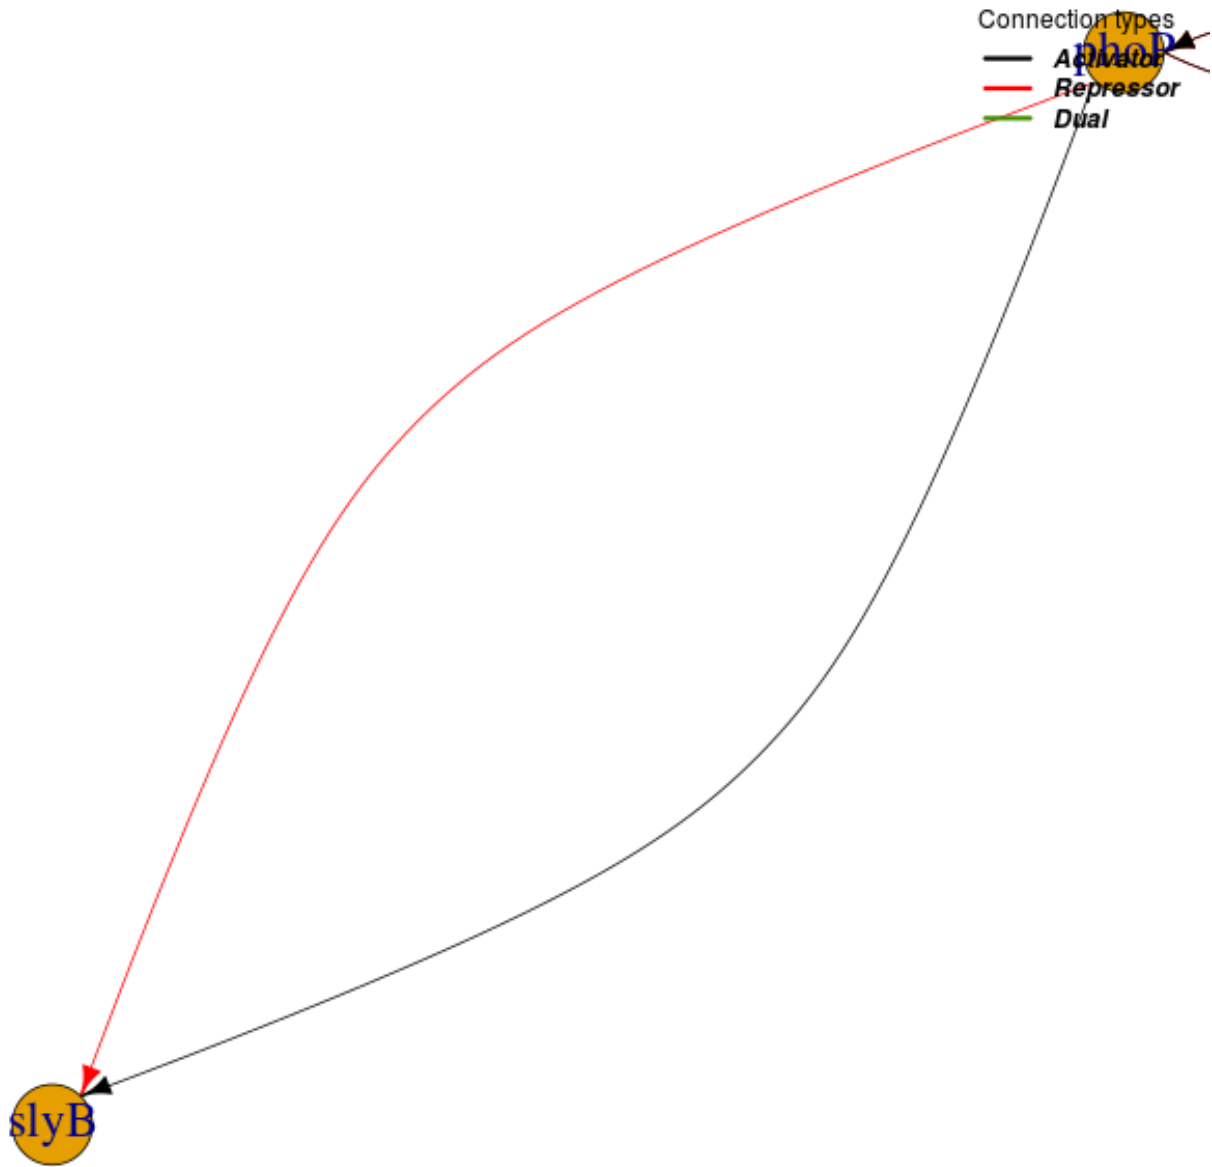

Id = 82

$|n = 0, \ell = 2\rangle$

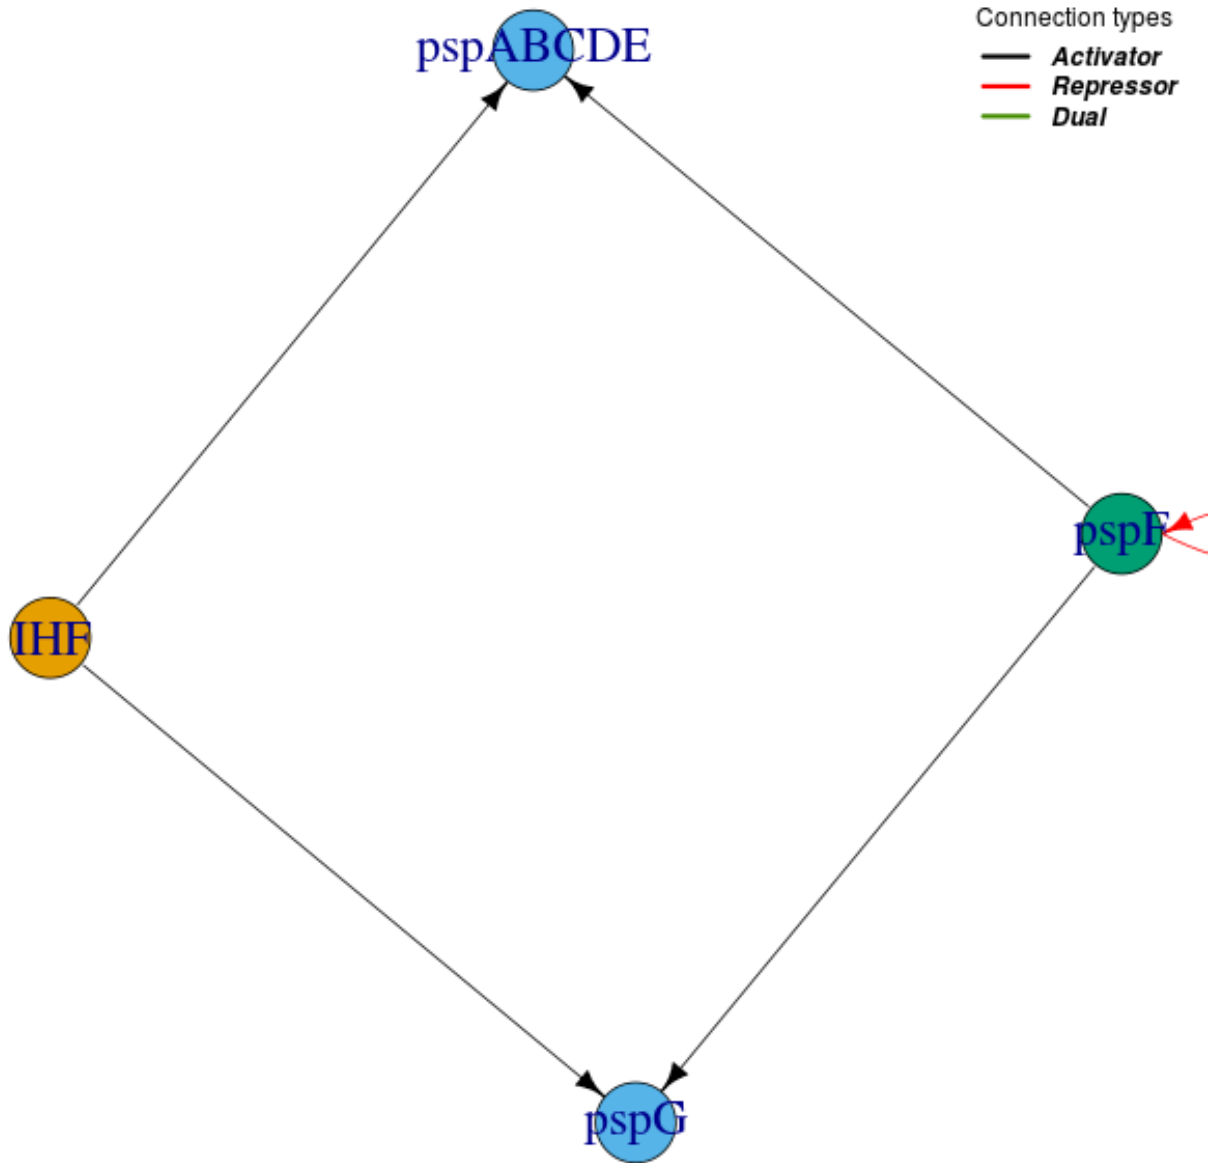

Id = 83

$|n = 1, \ell = 1\rangle$

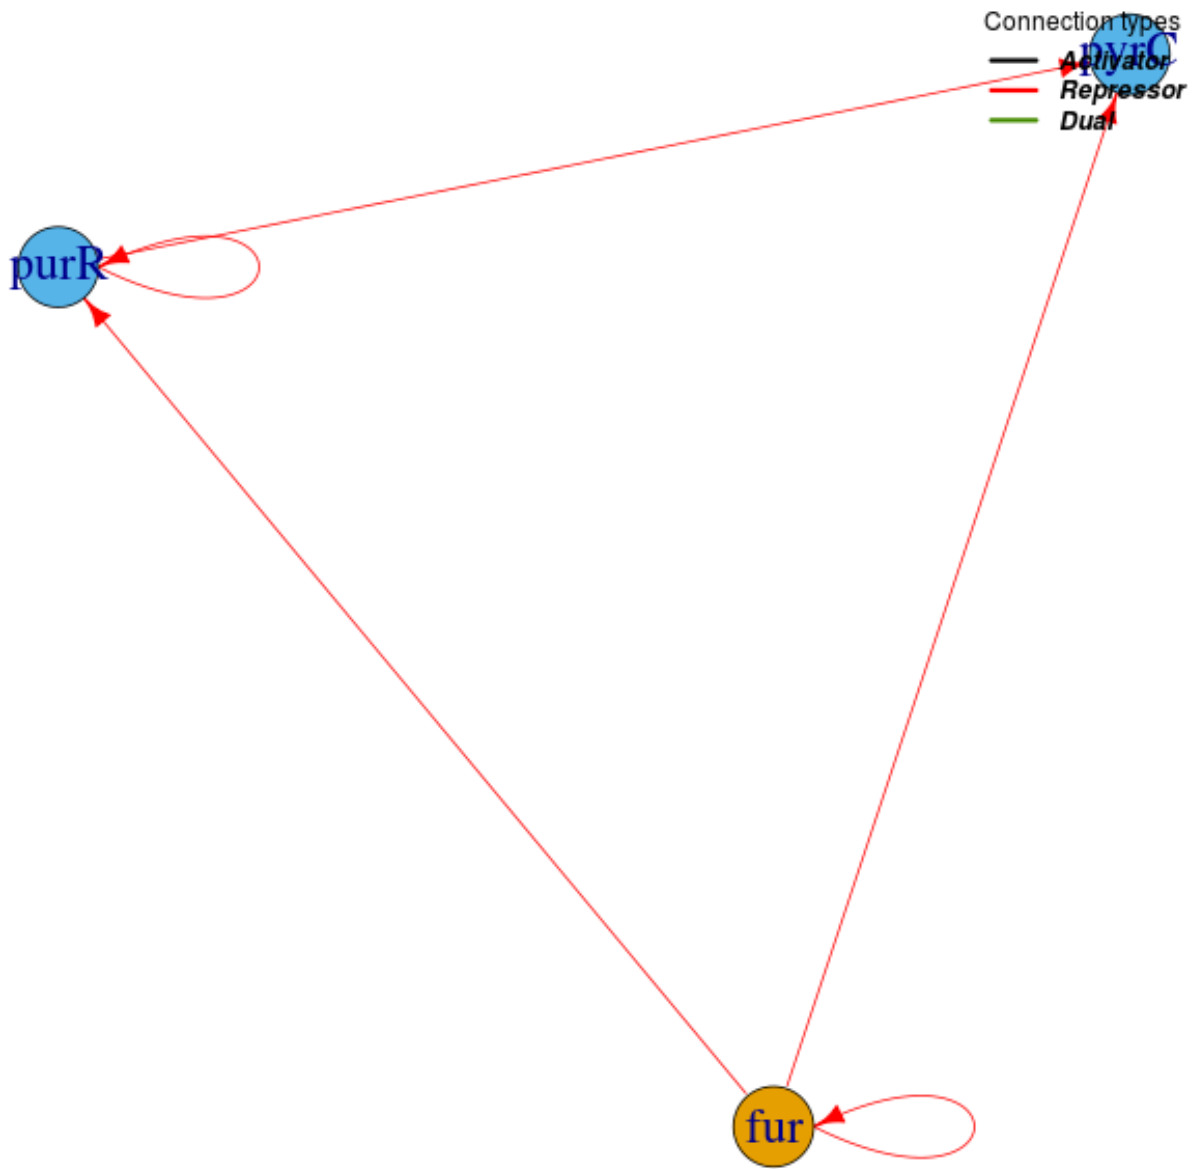

Id = 84

$|n = 2, \ell = 1\rangle$

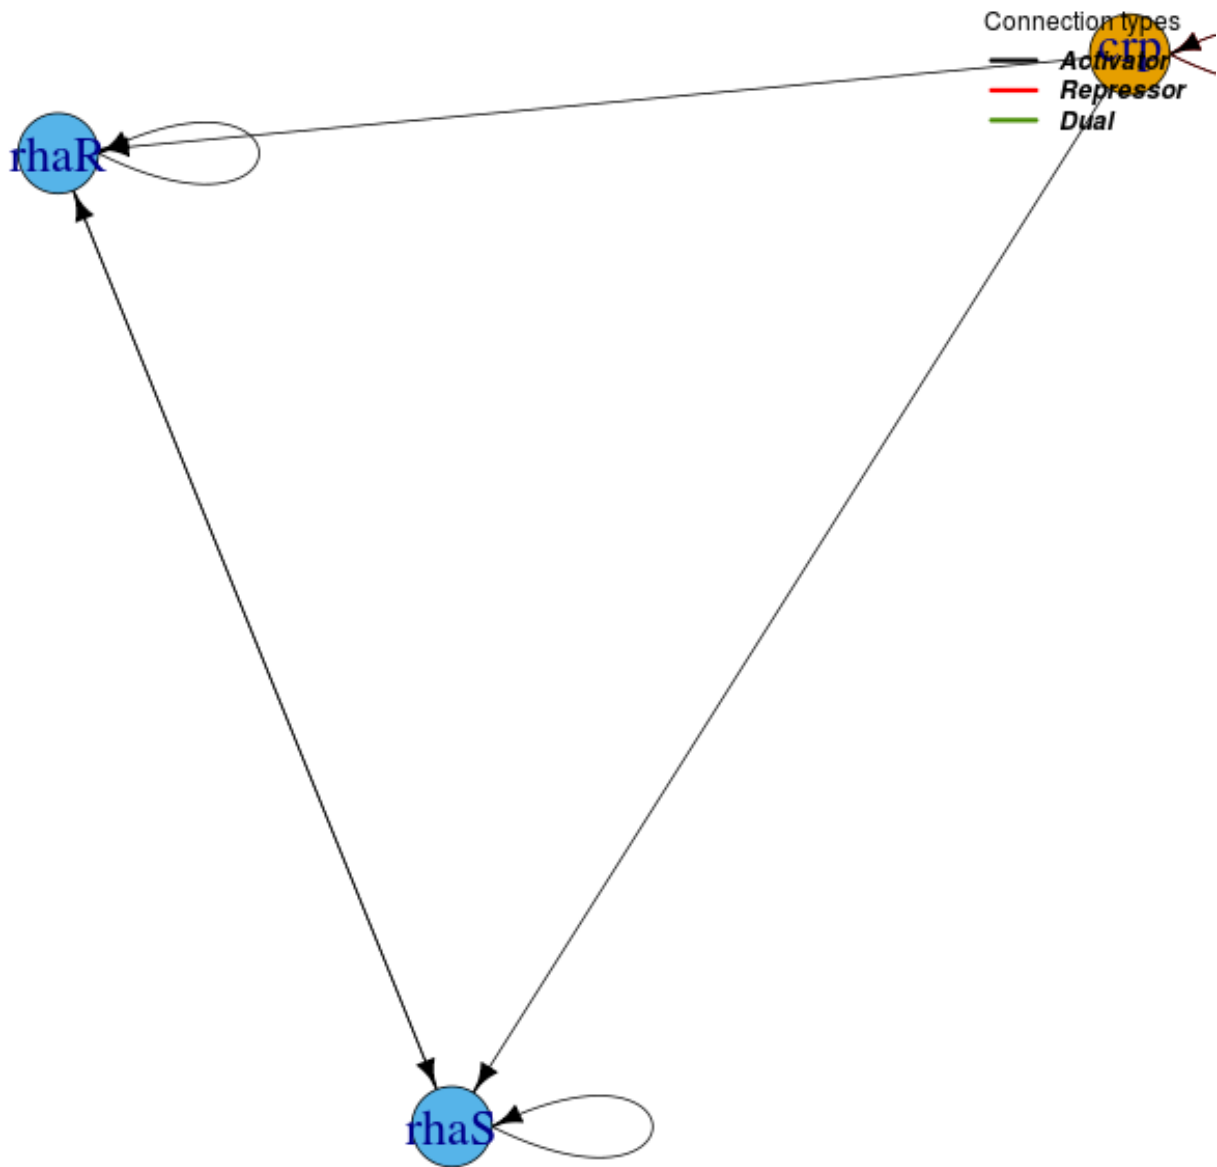

Id = 85

$|n = 0, \ell = 2\rangle$

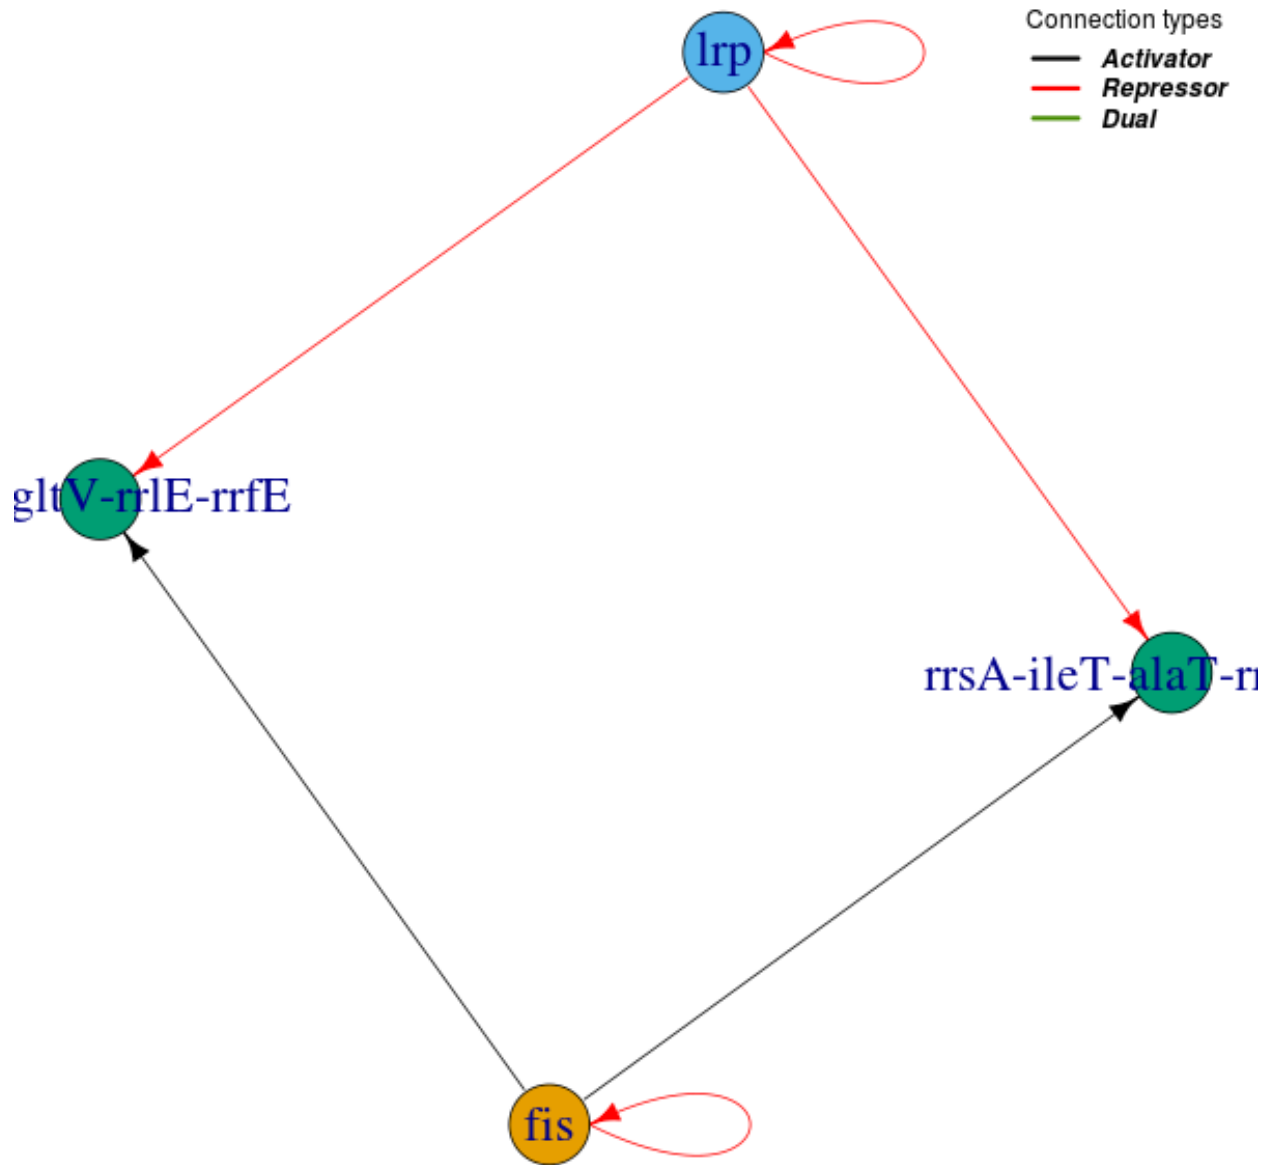

Id = 86

$|n = 0, \ell = 3\rangle$

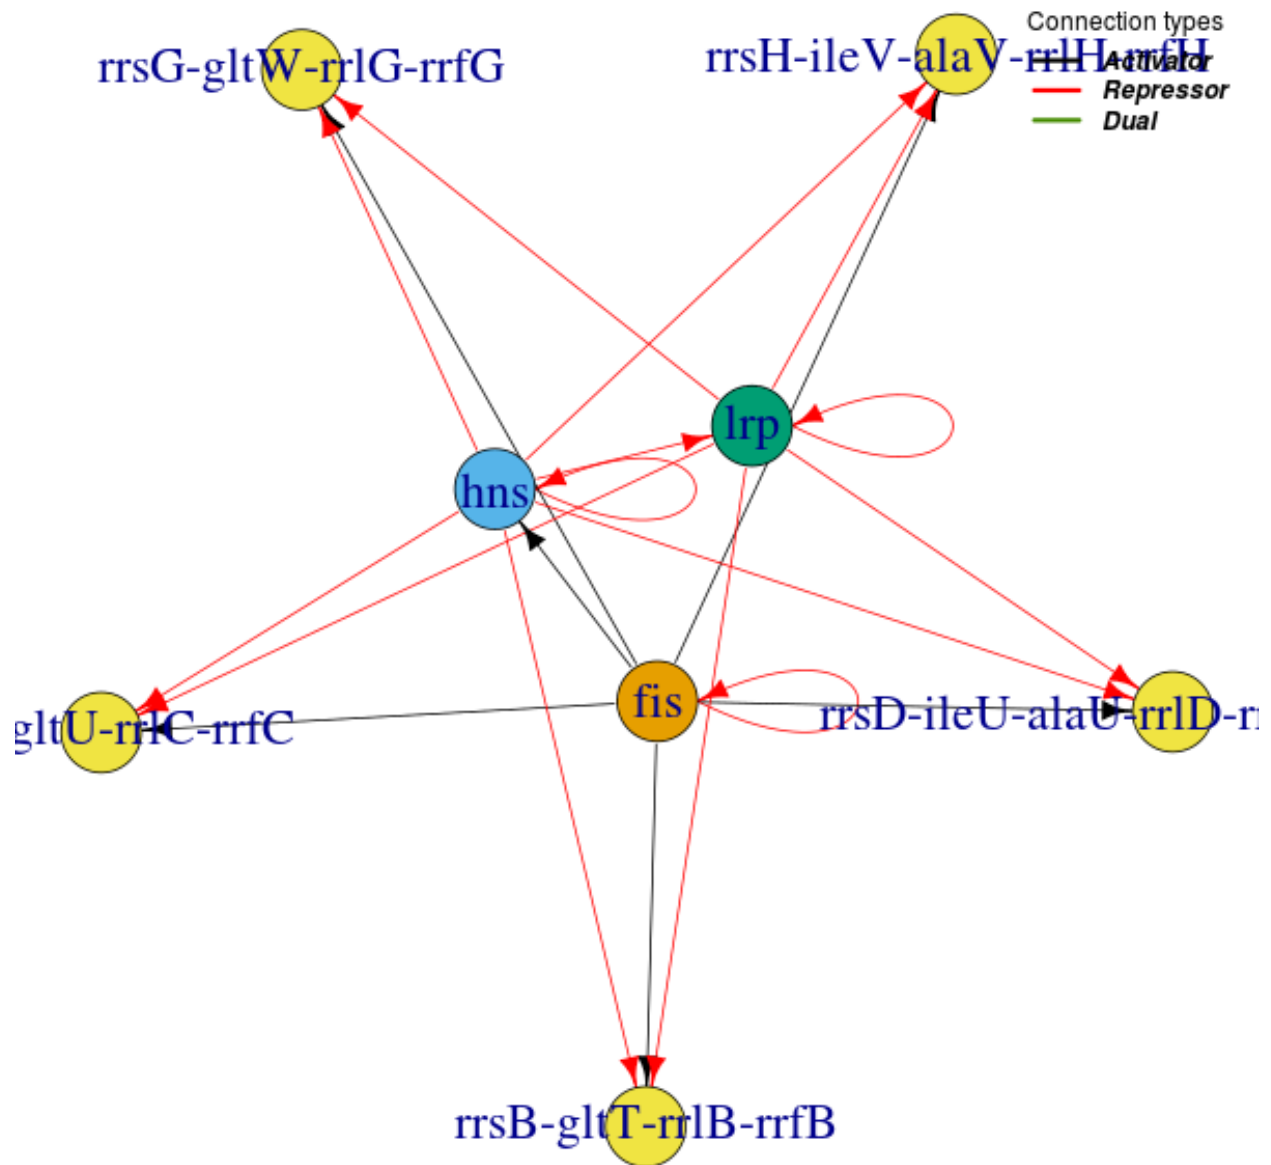

Id = 87

$|n = 0, \ell = 2\rangle$

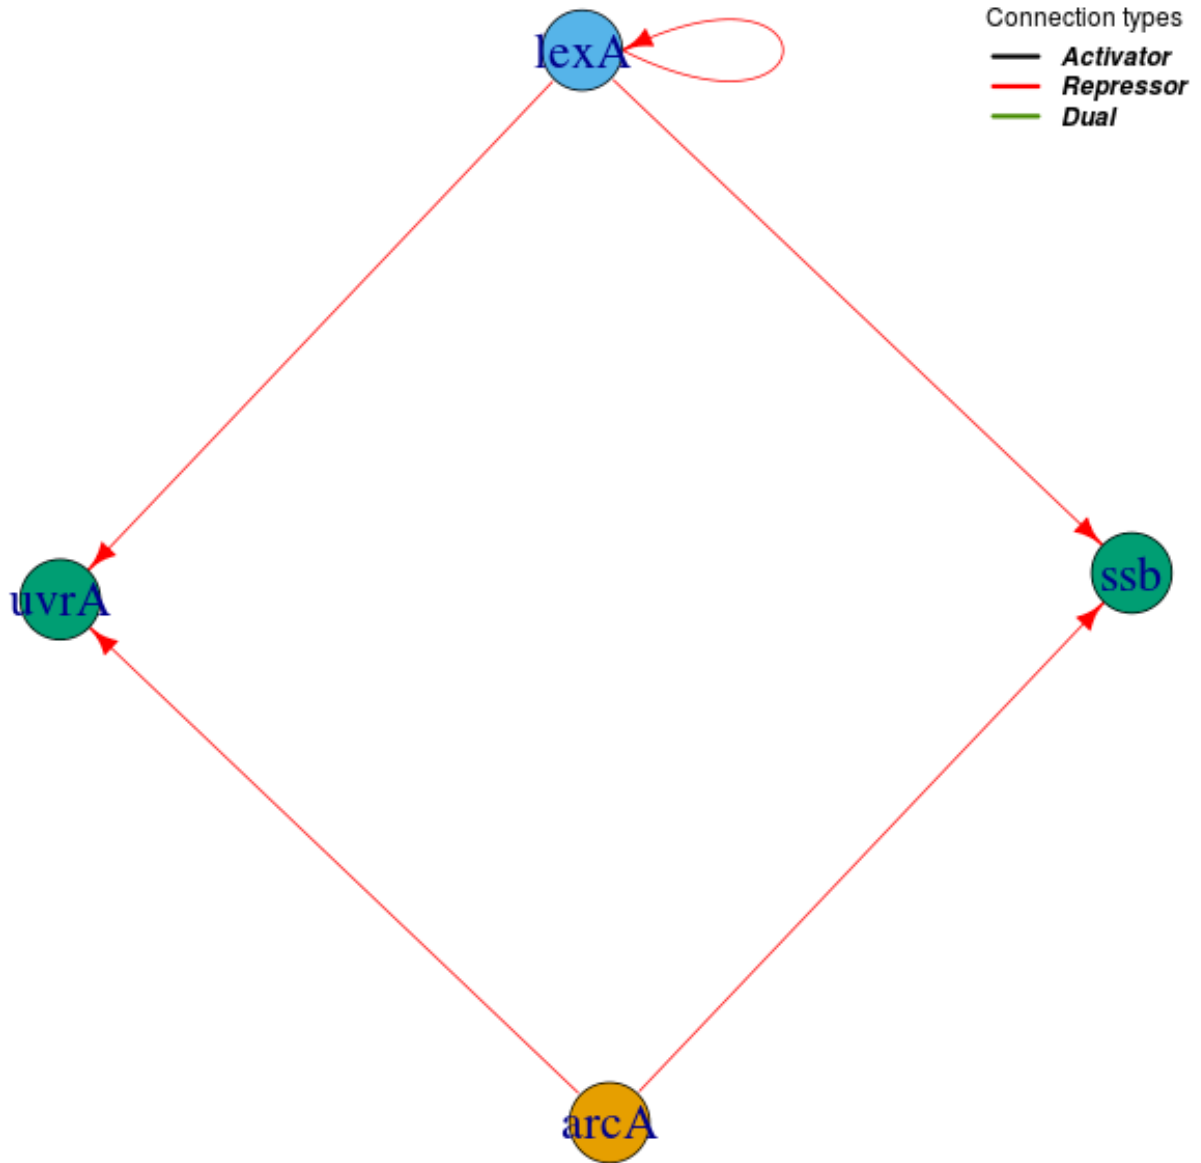

Id = 88

$|n = 1, \ell = 0\rangle$

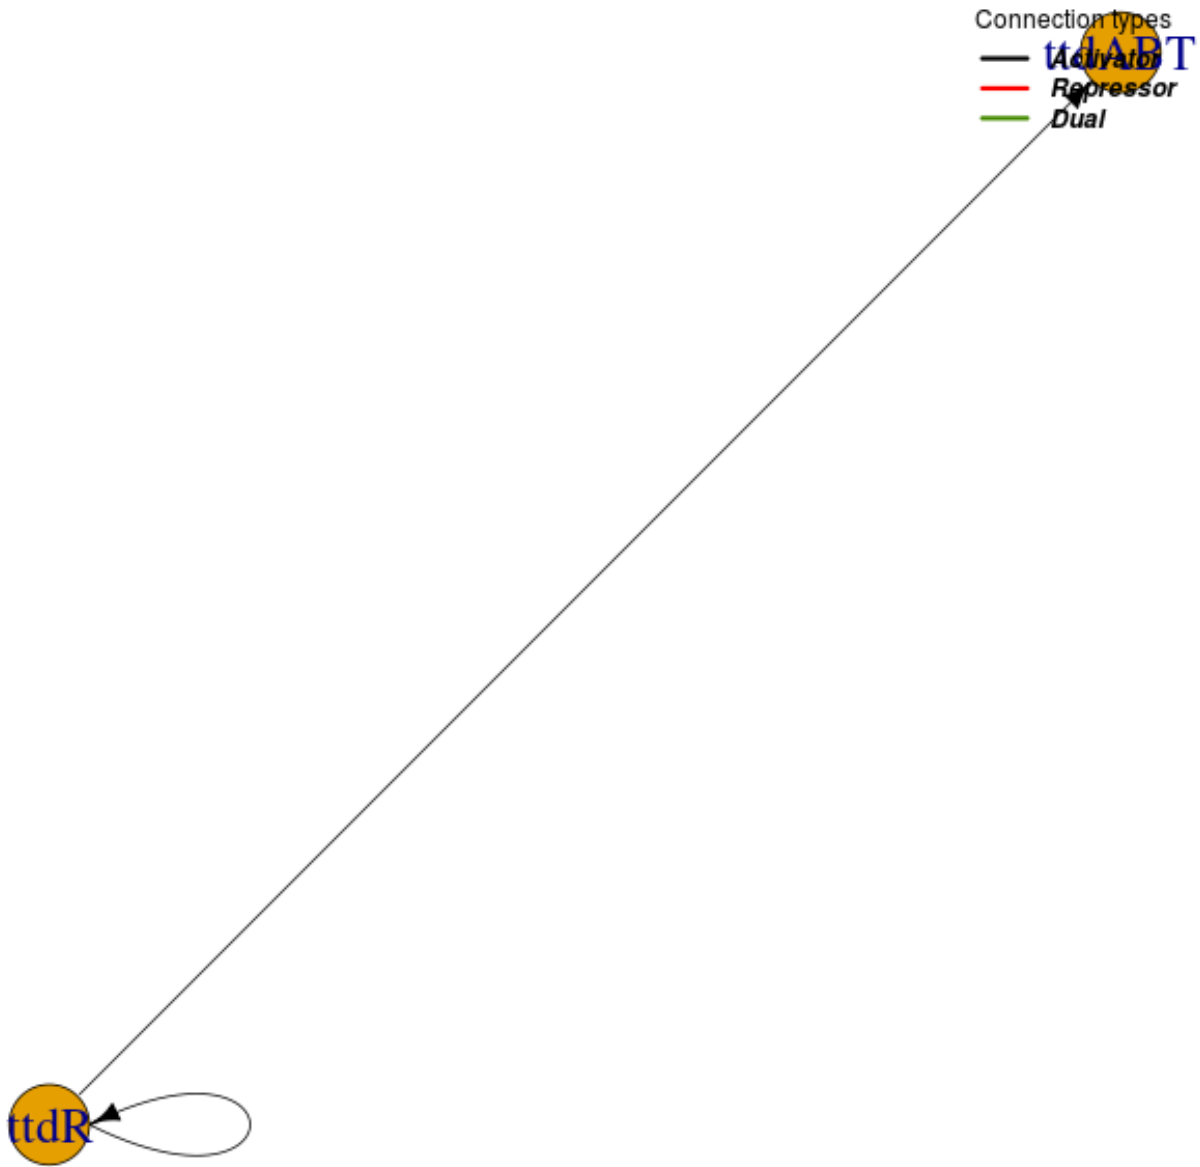



Id = 89

$|n = 0, \ell = 1\rangle$

ymjDC-mpaA

Connection types  
— *Activator*  
— *Repressor*  
— *Dual*

pgrR

ycjG

Id = 90

$|n = 0, \ell = 1\rangle$

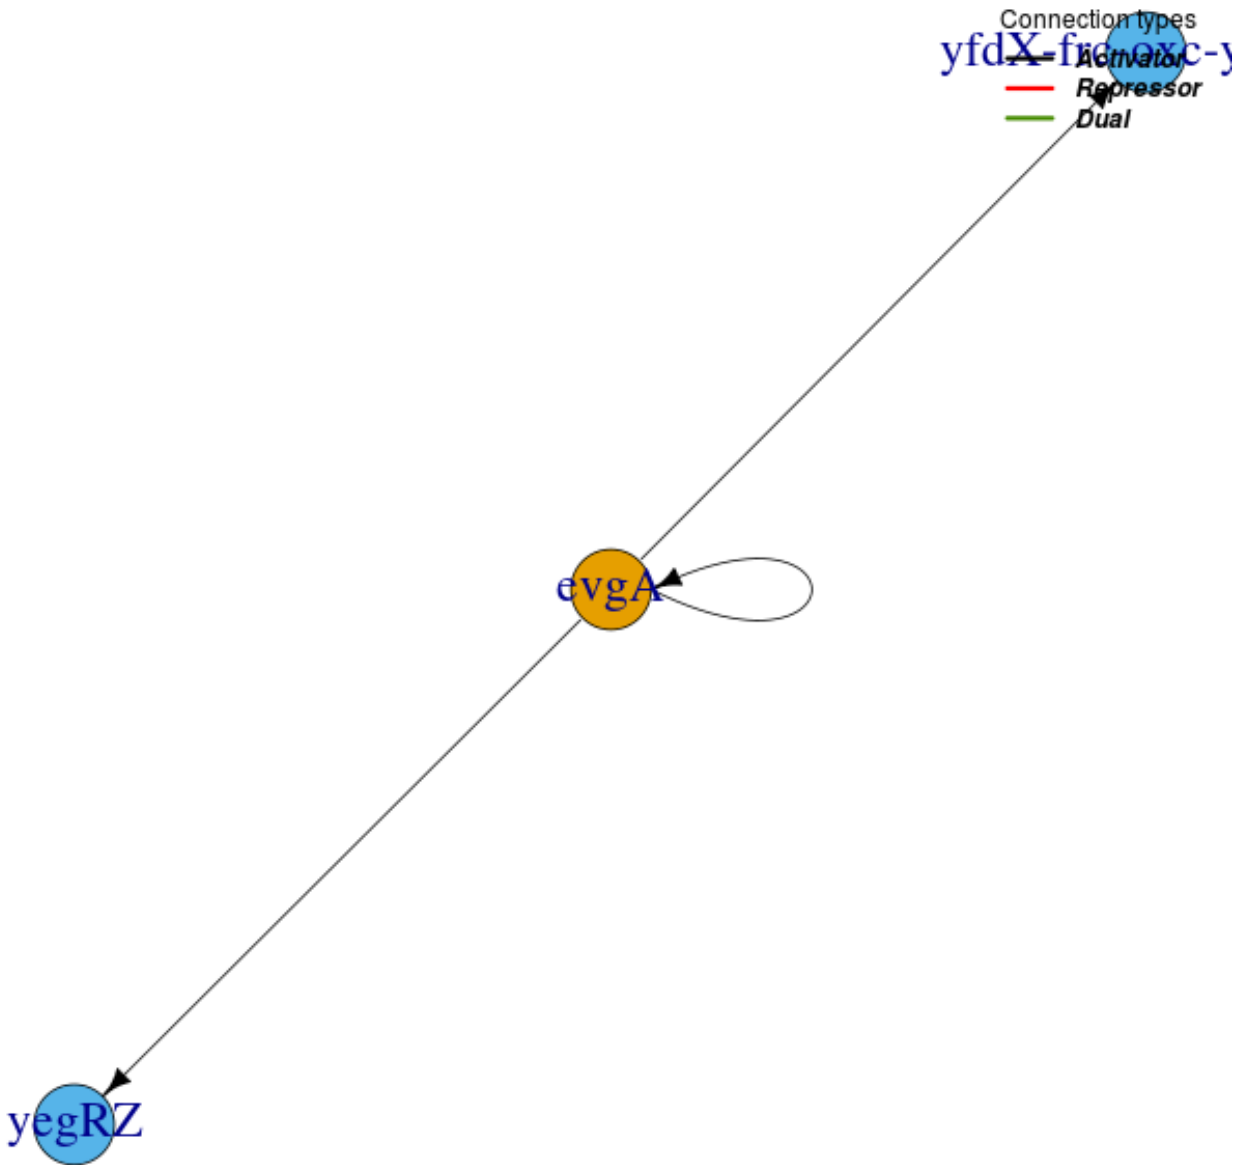

Id = 91

$|n = 0, \ell = 1\rangle$

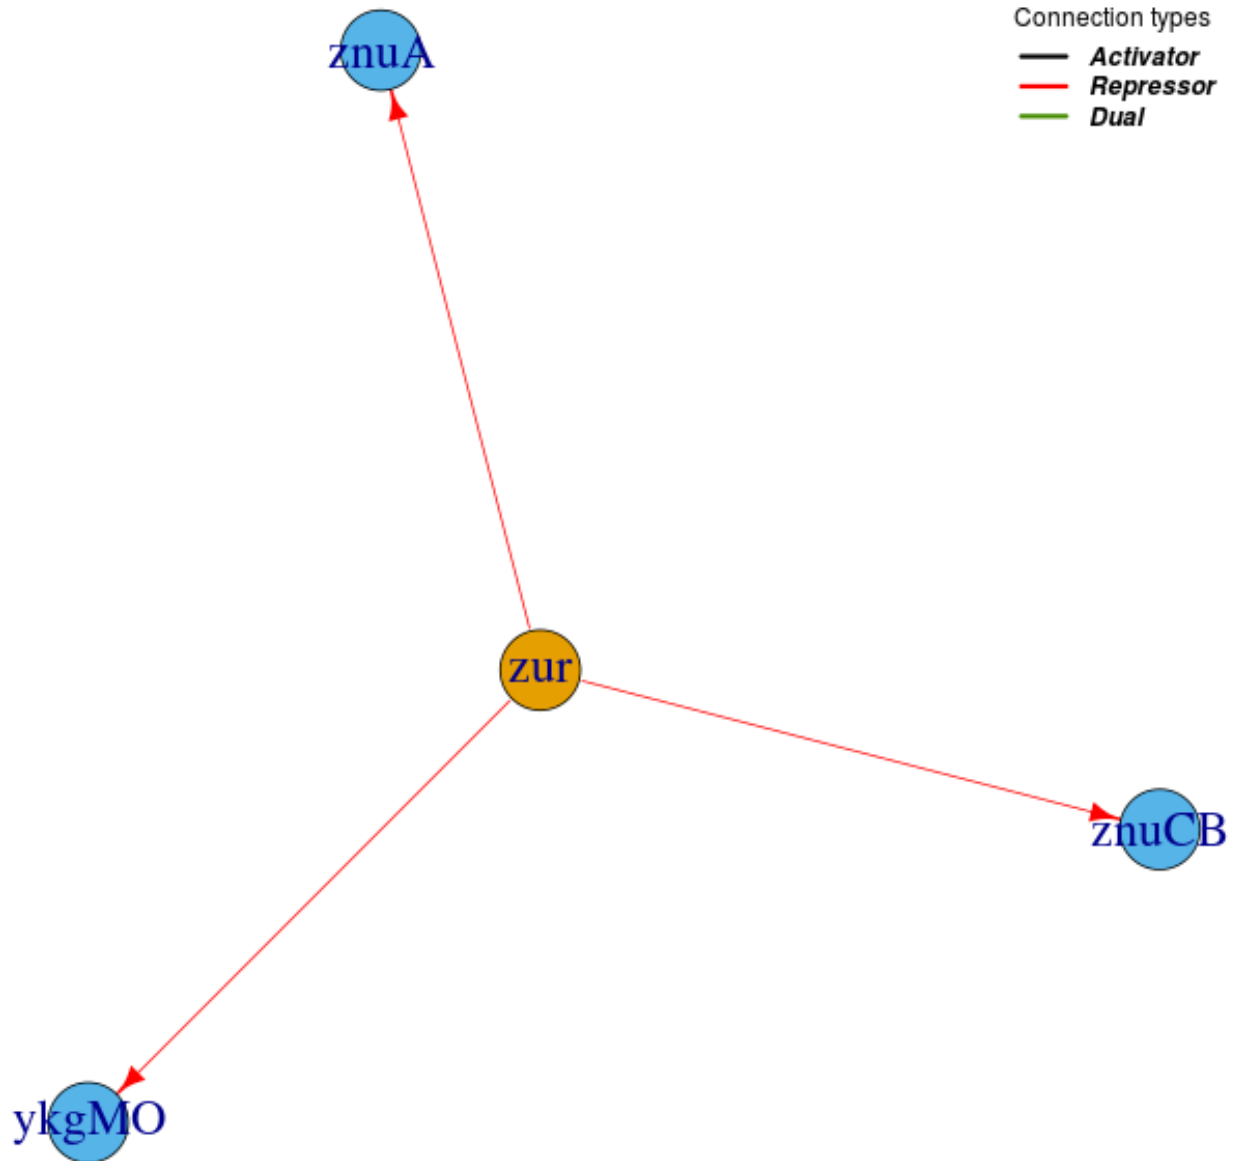

Supplement: pnas.1914628117.sd01.pdf [file pnas.1914628117.sd01.pdf]
